# Supplementary material for: Dissociations of copper(ii)-containing complexes of aromatic amino acids: radical cations of tryptophan, tyrosine, and phenylalanine
Source: Royal Society of Chemistry journal article supplement (doi:10.1039/b807692h), 2008-01-01
Supplement: b807692h.pdf [file b807692h.pdf]

# **Dissociations of Copper(II)-Containing Complexes of Aromatic Amino Acids: Radical Cations of Tryptophan, Tyrosine, and Phenylalanine**

Chi-Kit Siu, Yuyong Ke, Yuzhu Guo, Alan C. Hopkinson, and K. W. Michael Siu\*

Department of Chemistry and Centre for Research in Mass Spectrometry, York University, 4700  
Keele Street, Toronto, Ontario, Canada M3J 1P3

## **Supporting Information Section**

\* Tel: (416) 650-8021; FAX: (416) 736-5936; E-mail: kwmsiu@yorku.ca

**Content:**

Page

- P.3 **Figure S1.** CID spectra of  $[\text{Cu}^{\text{II}}(4\text{Cl-tpy})(\text{Phe})]^{\bullet 2+}$  and  $[\text{Cu}^{\text{II}}(4\text{Cl-tpy})(^{15}\text{N-Phe})]^{\bullet 2+}$ .
- P.4 **Figure S2.** Potential-energy scan for (a)  $[\text{Cu}^{\text{II}}(\text{tpy})(\text{Trp})]^{\bullet 2+}$  and (b)  $[\text{Cu}^{\text{II}}(\text{tpy})(\text{Phe})]^{\bullet 2+}$  at the UB3LYP/6-31++G(d,p) level.
- P.5 **Figure S3.** Possible reactions of the tyrosine radical cation. The relative energy  $\Delta H^{\circ}_0$  are evaluated at the UB3LYP/6-31++G(d,p) level and are in kcal mol<sup>-1</sup>.
- P.6 **Figure S4.** Possible reactions of the phenylalanine radical cation. The relative energy  $\Delta H^{\circ}_0$  are evaluated at the UB3LYP/6-31++G(d,p) level and are in kcal mol<sup>-1</sup>.
- P.7 **Table S1.** Cartesian coordinates for the geometries optimized at the UB3LYP/6-31++G(d,p) level.

**Figure S1.** CID spectra of  $[\text{Cu}^{\text{II}}(4\text{Cl-tpy})(\text{Phe})]^{2+}$  and  $[\text{Cu}^{\text{II}}(4\text{Cl-tpy})(^{15}\text{N-Phe})]^{2+}$

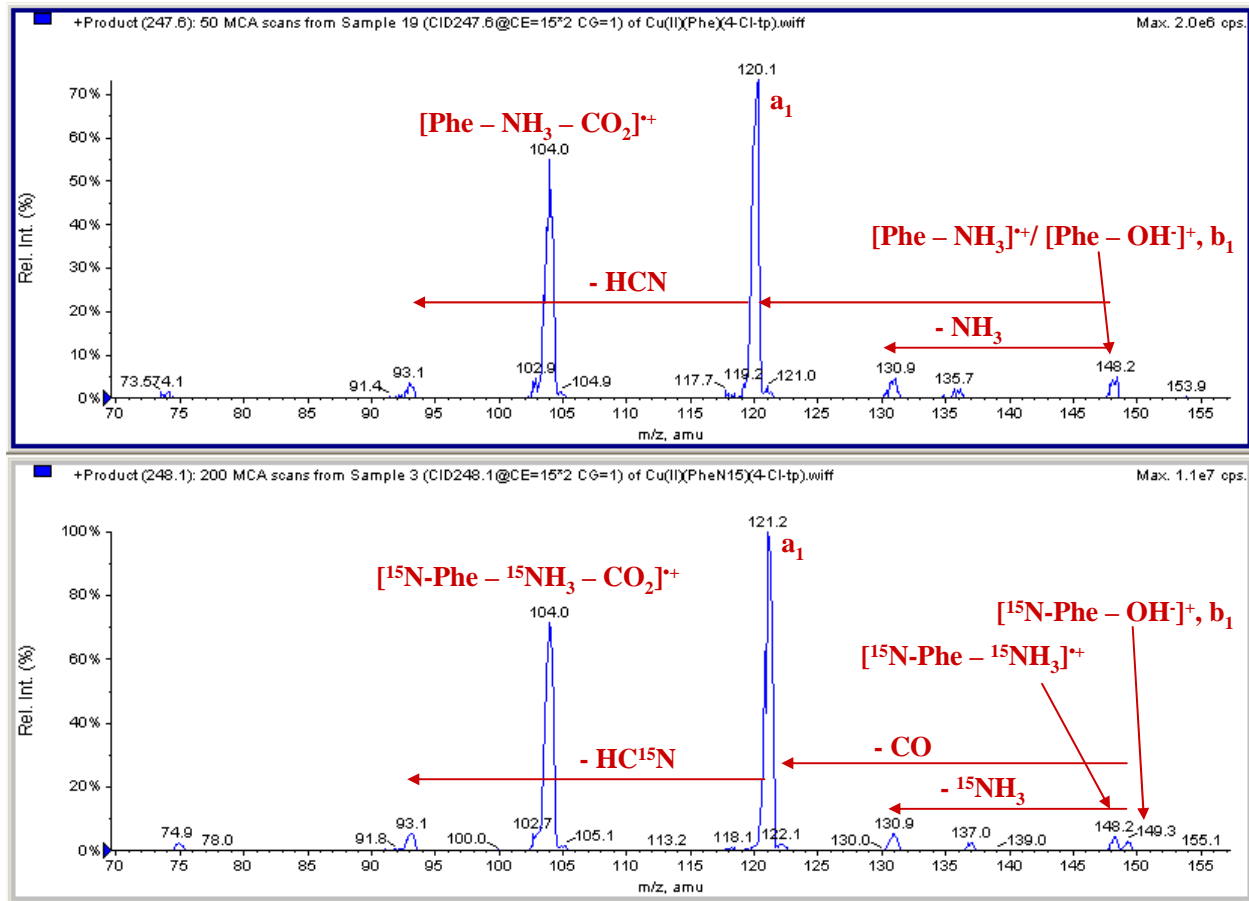

**Figure S2.** Potential-energy scan for (a)  $[\text{Cu}^{\text{II}}(\text{tpy})(\text{Trp})]^{\bullet 2+}$  and (b)  $[\text{Cu}^{\text{II}}(\text{tpy})(\text{Phe})]^{\bullet 2+}$  at the UB3LYP/6-31++G(d,p) level.

(a)

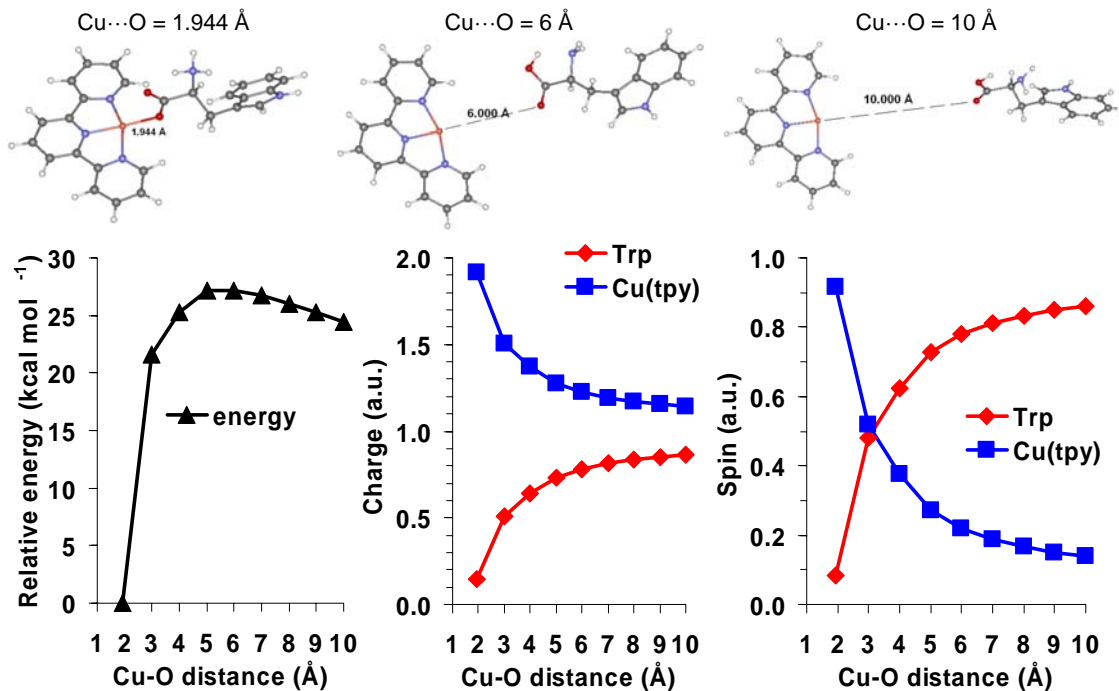

(b)

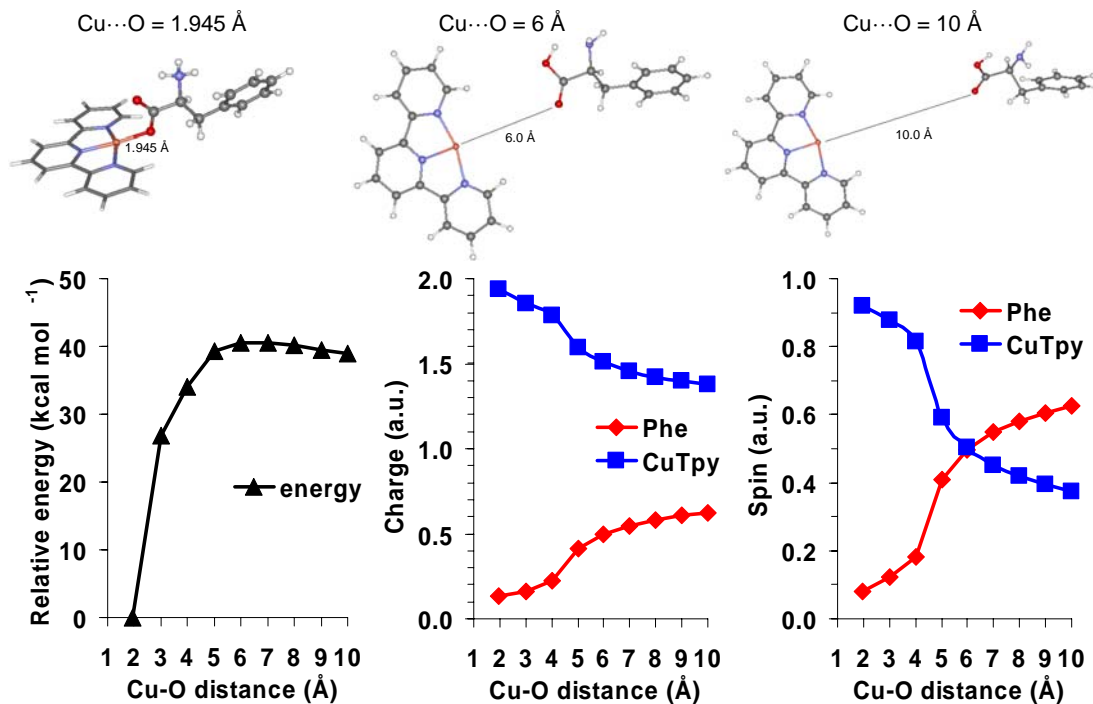

**Figure S3.** Possible reactions of the tyrosine radical cation. The relative energy  $\Delta H^{\circ}_0$  are evaluated at the UB3LYP/6-31++G(d,p) level and are in kcal mol<sup>-1</sup>.

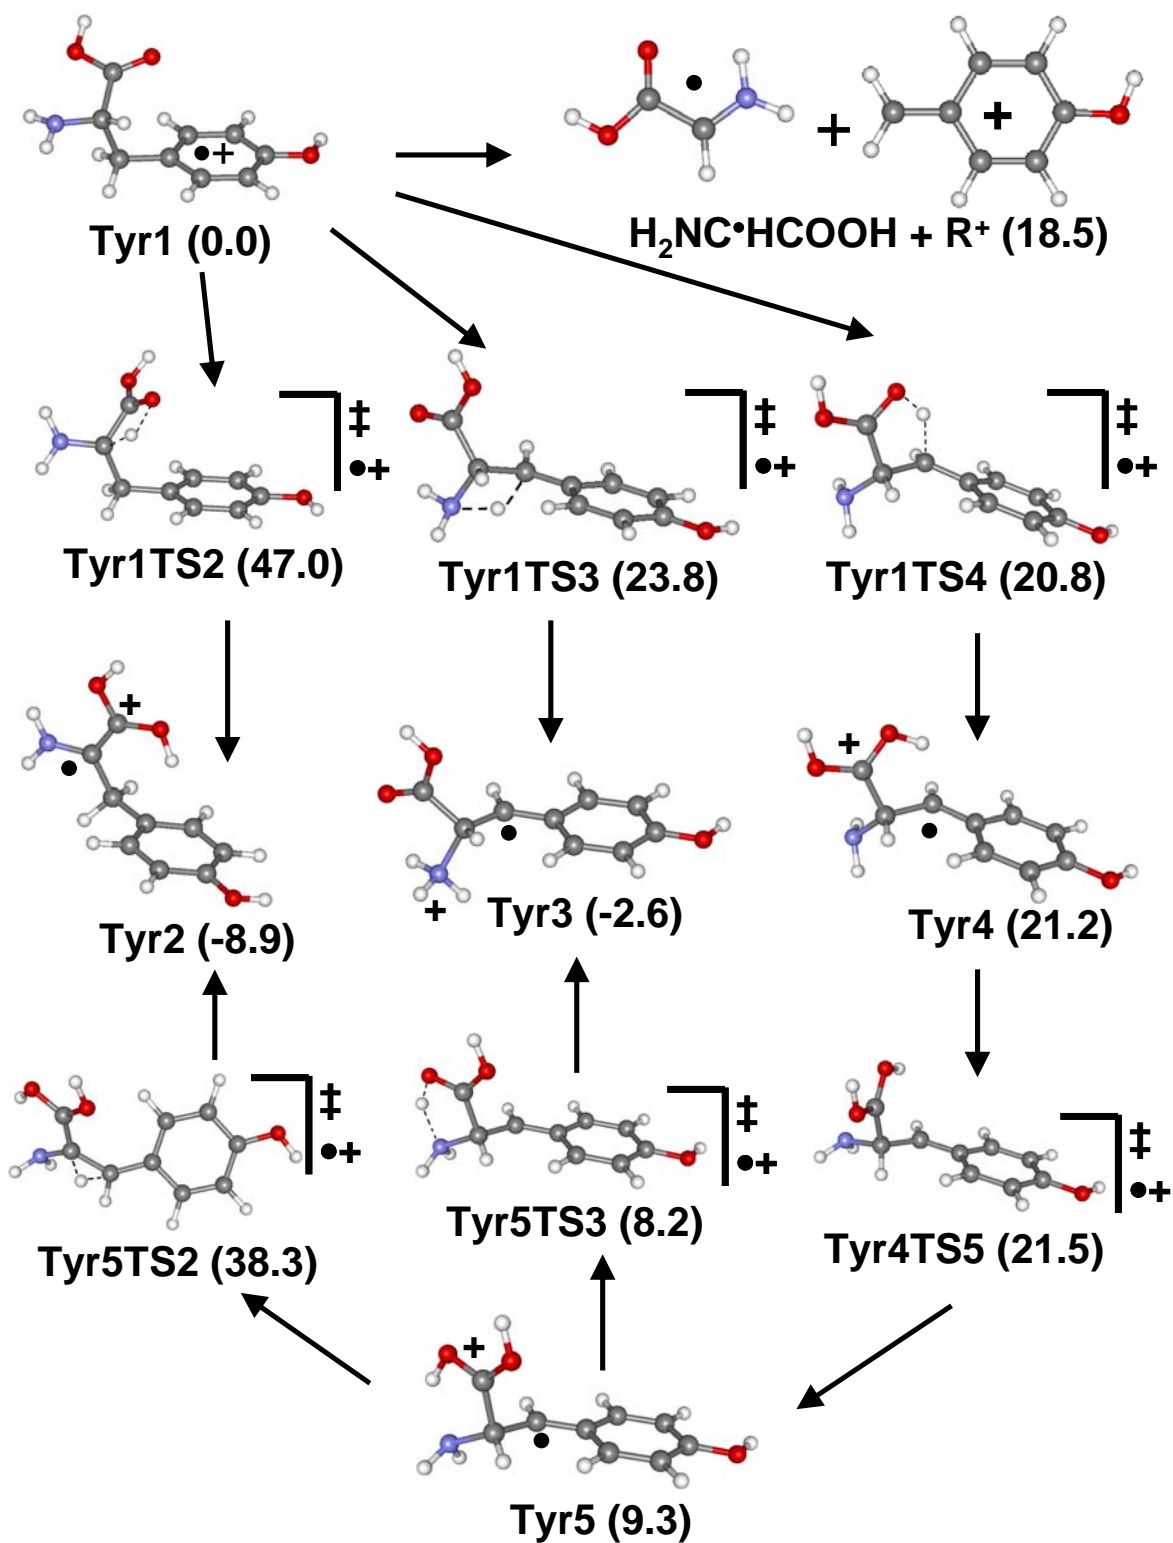

**Figure S4.** Possible reactions of the phenylalanine radical cation. The relative energy  $\Delta H^{\circ}_0$  are evaluated at the UB3LYP/6-31++G(d,p) level and are in kcal mol<sup>-1</sup>.

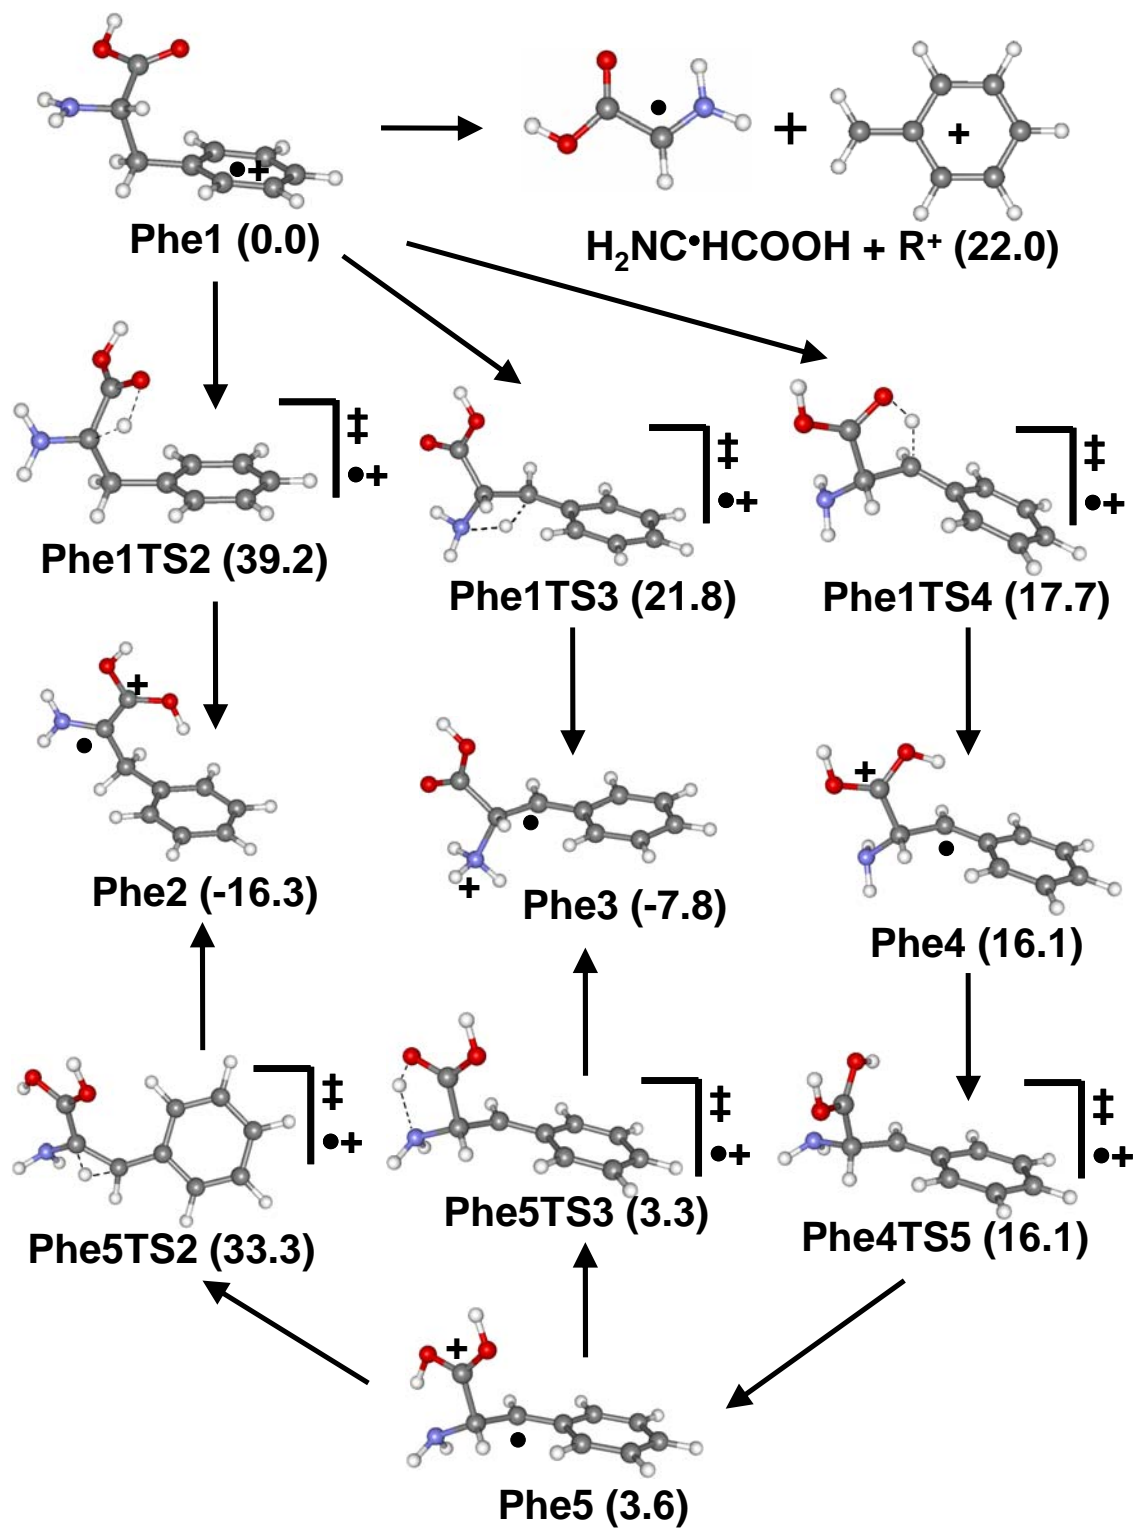

Electronic Supplementary Material for *CPPIs* optimized at the UB3LYP/6-31++G(d,p) level.  
 This journal is (c) The Owner Societies 2008

| Column 1<br>Atomic Symbol                                                       | Column 2<br>X-coordinate | Column 3<br>Y-coordinate | Column 4<br>Z-coordinate | Column 5<br>NPA charge | Column 6<br>NPA spin |
|---------------------------------------------------------------------------------|--------------------------|--------------------------|--------------------------|------------------------|----------------------|
| <b>Optimized geometries for glycine as shown in Table 2</b>                     |                          |                          |                          |                        |                      |
| 8                                                                               |                          |                          |                          |                        |                      |
| NH=CH-COOH                                                                      | E=-283.226040162         | H0=-283.169737           | H298=-283.164099         | G298=-283.197378       |                      |
| H                                                                               | 1.54118                  | -0.48904                 | 0.00000                  | 0.52761                |                      |
| H                                                                               | -0.67163                 | -2.63304                 | 0.00000                  | 0.38896                |                      |
| H                                                                               | -1.84628                 | -0.62581                 | 0.00000                  | 0.22082                |                      |
| C                                                                               | -0.75621                 | -0.71582                 | 0.00000                  | 0.01856                |                      |
| C                                                                               | 0.00000                  | 0.59544                  | 0.00000                  | 0.73906                |                      |
| N                                                                               | -0.08500                 | -1.79595                 | 0.00000                  | -0.64185               |                      |
| O                                                                               | 1.33442                  | 0.46817                  | 0.00000                  | -0.69829               |                      |
| O                                                                               | -0.57080                 | 1.66206                  | 0.00000                  | -0.55486               |                      |
| 9                                                                               |                          |                          |                          |                        |                      |
| Gly+                                                                            | E=-283.561091106         | H0=-283.491536           | H298=-283.485630         | G298=-283.519521       |                      |
| H                                                                               | -2.42971                 | -0.22174                 | 0.00006                  | 0.56113                |                      |
| H                                                                               | 1.75502                  | 1.03061                  | -0.00001                 | 0.48689                |                      |
| H                                                                               | 2.75684                  | -0.42046                 | 0.00003                  | 0.48341                |                      |
| H                                                                               | 0.78146                  | -1.77065                 | 0.00002                  | 0.29025                |                      |
| C                                                                               | 0.75154                  | -0.68215                 | 0.00000                  | 0.20656                |                      |
| C                                                                               | -0.55285                 | 0.10842                  | -0.00005                 | 0.73400                |                      |
| N                                                                               | 1.82943                  | 0.00456                  | 0.00001                  | -0.59949               |                      |
| O                                                                               | -1.58532                 | -0.71456                 | 0.00001                  | -0.65229               |                      |
| O                                                                               | -0.52240                 | 1.31365                  | 0.00002                  | -0.51047               |                      |
| 9                                                                               |                          |                          |                          |                        |                      |
| Gly•                                                                            | E=-283.824840469         | H0=-283.758260           | H298=-283.751766         | G298=-283.787098       |                      |
| H                                                                               | 2.37956                  | -0.09890                 | 0.00025                  | 0.51476                | -0.00188             |
| H                                                                               | -1.84066                 | 1.02081                  | 0.04582                  | 0.43791                | -0.00626             |
| H                                                                               | -2.76845                 | -0.44274                 | 0.14180                  | 0.42158                | -0.00536             |
| H                                                                               | -0.73481                 | -1.75614                 | 0.00763                  | 0.23261                | -0.01597             |
| C                                                                               | -0.71603                 | -0.67514                 | 0.00673                  | -0.10475               | 0.52351              |
| C                                                                               | 0.50171                  | 0.07432                  | 0.00200                  | 0.67349                | 0.05357              |
| N                                                                               | -1.88899                 | 0.01299                  | -0.03850                 | -0.78628               | 0.26352              |
| O                                                                               | 1.62443                  | -0.70865                 | -0.00192                 | -0.72827               | 0.03468              |
| O                                                                               | 0.55973                  | 1.30752                  | 0.00463                  | -0.66105               | 0.15421              |
| <b>Optimized geometries for phenylalanine as shown in Table 2 and Figure 5c</b> |                          |                          |                          |                        |                      |
| 23                                                                              |                          |                          |                          |                        |                      |
| Phe1                                                                            | E=-554.541143971         | H0=-554.353658           | H298=-554.341028         | G298=-554.393145       |                      |
| H                                                                               | -0.91293                 | 0.50613                  | 1.81491                  | 0.27063                | 0.00176              |
| H                                                                               | -0.55389                 | 2.07863                  | 1.04324                  | 0.27762                | 0.00716              |
| H                                                                               | -2.79217                 | -2.28425                 | 0.04948                  | 0.54450                | 0.00060              |
| H                                                                               | -3.53685                 | 0.87213                  | 0.74558                  | 0.44492                | -0.00837             |
| H                                                                               | -3.16739                 | 2.26003                  | -0.21827                 | 0.44210                | -0.00862             |
| H                                                                               | 1.26469                  | 2.27635                  | -0.66955                 | 0.25304                | -0.00238             |
| H                                                                               | 3.52003                  | 1.48907                  | -1.31701                 | 0.26862                | 0.00053              |
| H                                                                               | 4.33063                  | -0.72963                 | -0.53356                 | 0.26422                | -0.00624             |
| H                                                                               | 2.90302                  | -2.15231                 | 0.92464                  | 0.26850                | 0.00056              |
| H                                                                               | 0.63931                  | -1.38194                 | 1.56502                  | 0.25463                | -0.00233             |
| H                                                                               | -1.29866                 | 1.21268                  | -1.17043                 | 0.28949                | 0.00338              |
| C                                                                               | 1.62123                  | 1.30655                  | -0.33328                 | -0.18225               | 0.07796              |
| C                                                                               | 2.88280                  | 0.87067                  | -0.69387                 | -0.21481               | -0.02321             |
| C                                                                               | 3.34317                  | -0.38383                 | -0.24374                 | -0.09928               | 0.22324              |
| C                                                                               | 2.53298                  | -1.19379                 | 0.57673                  | -0.21245               | -0.02216             |
| C                                                                               | 1.26769                  | -0.76215                 | 0.93233                  | -0.17445               | 0.07577              |
| C                                                                               | 0.79120                  | 0.50579                  | 0.50120                  | 0.01799                | 0.14127              |
| C                                                                               | -0.53660                 | 0.99489                  | 0.91397                  | -0.44609               | 0.06349              |
| C                                                                               | -1.69975                 | 0.75166                  | -0.26727                 | -0.14350               | 0.04611              |
| C                                                                               | -1.79063                 | -0.76120                 | -0.50142                 | 0.80353                | 0.00771              |
| N                                                                               | -2.92678                 | 1.32221                  | 0.07391                  | -0.69210               | 0.35130              |
| O                                                                               | -2.75945                 | -1.32776                 | 0.23376                  | -0.71012               | 0.00480              |
| O                                                                               | -1.03816                 | -1.34398                 | -1.24119                 | -0.52475               | 0.06767              |
| 23                                                                              |                          |                          |                          |                        |                      |
| Phe2                                                                            | E=-554.568977897         | H0=-554.379670           | H298=-554.367664         | G298=-554.417707       |                      |
| H                                                                               | 0.61803                  | -1.06890                 | 1.94276                  | 0.28581                | 0.01331              |
| H                                                                               | 0.56179                  | -2.28657                 | 0.68166                  | 0.27656                | 0.00382              |
| H                                                                               | 2.95092                  | 2.19295                  | -0.76471                 | 0.55588                | -0.00215             |
| H                                                                               | 0.04134                  | 1.30150                  | 0.34948                  | 0.55318                | -0.00186             |
| H                                                                               | 3.64794                  | -0.97498                 | -0.48266                 | 0.45886                | -0.00732             |
| H                                                                               | 2.78489                  | -2.35447                 | 0.11262                  | 0.45031                | -0.00797             |
| H                                                                               | -1.28891                 | 0.30195                  | 2.26525                  | 0.25654                | 0.00003              |

| Electronic Supplementary Material            |        | S14      |          |          |          |
|----------------------------------------------|--------|----------|----------|----------|----------|
| This journal is (c) The Owner Societies 2008 |        | S14      |          |          |          |
| H                                            | 1.4502 | 1.22605  | 1.47496  | 0.26248  | -0.00006 |
| H                                            | 1.4502 | 0.76961  | -0.84218 | 0.26208  | -0.00004 |
| H                                            | 1.4502 | -2.83088 | -0.61425 | 0.26067  | 0.00002  |
| H                                            | 1.4502 | -0.66638 | -1.52213 | 0.24762  | -0.00005 |
| C                                            | 1.4502 | -1.60678 | 0.12512  | 1.23999  | -0.27342 |
| C                                            | 1.4502 | -2.83360 | 0.63793  | 0.79810  | -0.20599 |
| C                                            | 1.4502 | -3.27162 | 0.37782  | -0.50107 | -0.20516 |
| C                                            | 1.4502 | -2.48623 | -0.40003 | -1.35997 | -0.20259 |
| C                                            | 1.4502 | -1.26272 | -0.90955 | -0.92476 | -0.22475 |
| C                                            | 1.4502 | -0.80912 | -0.64946 | 0.37981  | -0.11446 |
| C                                            | 1.4502 | 0.52547  | -1.20510 | 0.85670  | -0.50174 |
| C                                            | 1.4502 | 1.73999  | -0.58887 | 0.19855  | 0.16591  |
| C                                            | 1.4502 | 1.84384  | 0.79268  | -0.08686 | 0.70984  |
| N                                            | 1.4502 | 2.79993  | -1.36267 | -0.08572 | -0.69912 |
| O                                            | 1.4502 | 0.91383  | 1.69866  | 0.10994  | -0.65128 |
| O                                            | 1.4502 | 2.98814  | 1.23693  | -0.58203 | -0.66724 |

23

| Phe3 |        | E=-554.555982645 | H0=-554.366127 | H298=-554.353790 | H298=-554.405827 |          |
|------|--------|------------------|----------------|------------------|------------------|----------|
| H    | 1.4502 | 2.71172          | 1.15714        | -1.46625         | 0.48768          | -0.00114 |
| H    | 1.4502 | 2.37290          | 2.39248        | -0.41074         | 0.46869          | 0.00483  |
| H    | 1.4502 | 3.36569          | -1.70009       | 1.49468          | 0.54510          | -0.00024 |
| H    | 1.4502 | 1.20161          | 1.91876        | -1.50366         | 0.47583          | -0.00081 |
| H    | 1.4502 | 0.63258          | -1.05272       | -1.26928         | 0.24853          | -0.01659 |
| H    | 1.4502 | -1.60671         | -1.70648       | -1.63100         | 0.24843          | -0.00623 |
| H    | 1.4502 | -4.02476         | -1.52894       | -1.17235         | 0.26179          | 0.00267  |
| H    | 1.4502 | -4.86444         | 0.12299        | 0.49221          | 0.25850          | -0.00746 |
| H    | 1.4502 | -3.26351         | 1.59478        | 1.69849          | 0.25902          | 0.00244  |
| H    | 1.4502 | -0.86369         | 1.44026        | 1.27186          | 0.22551          | -0.00599 |
| H    | 1.4502 | 1.15447          | 0.98836        | 0.99275          | 0.28849          | 0.00260  |
| C    | 1.4502 | 1.45170          | 0.48296        | 0.07297          | -0.19229         | -0.00463 |
| C    | 1.4502 | 0.34547          | -0.29571       | -0.54367         | -0.21889         | 0.58587  |
| C    | 1.4502 | 2.70058          | -0.37695       | 0.31420          | 0.80614          | 0.01114  |
| C    | 1.4502 | -1.02691         | -0.14665       | -0.23144         | -0.10071         | -0.08875 |
| C    | 1.4502 | -1.53613         | 0.79000        | 0.71999          | -0.21154         | 0.19536  |
| C    | 1.4502 | -2.89631         | 0.88000        | 0.96902          | -0.22010         | -0.08766 |
| C    | 1.4502 | -3.80118         | 0.04797        | 0.28907          | -0.16835         | 0.24992  |
| C    | 1.4502 | -3.32719         | -0.88296       | -0.64914         | -0.22332         | -0.09567 |
| C    | 1.4502 | -1.97051         | -0.98241       | -0.90768         | -0.17578         | 0.20374  |
| N    | 1.4502 | 1.96087          | 1.59024        | -0.90023         | -0.79662         | 0.04547  |
| O    | 1.4502 | 3.65155          | -0.34552       | -0.44183         | -0.59649         | 0.00632  |
| O    | 1.4502 | 2.57606          | -1.13643       | 1.39246          | -0.66961         | 0.00479  |

23

| Phe4 |        | E=-554.515737225 | H0=-554.328050 | H298=-554.315742 | G298=-554.367235 |          |
|------|--------|------------------|----------------|------------------|------------------|----------|
| H    | 1.4502 | 1.18678          | -1.01201       | -1.40480         | 0.55818          | 0.01232  |
| H    | 1.4502 | 0.48987          | 1.33966        | -1.30168         | 0.24631          | -0.01513 |
| H    | 1.4502 | 4.23286          | -1.28280       | -0.25909         | 0.55766          | 0.00105  |
| H    | 1.4502 | 2.29461          | 2.36386        | 0.16056          | 0.40967          | -0.00152 |
| H    | 1.4502 | 1.80856          | 2.05791        | 1.70784          | 0.42303          | -0.00124 |
| H    | 1.4502 | -1.79182         | 1.34267        | -1.90435         | 0.24709          | -0.00633 |
| H    | 1.4502 | -4.14480         | 0.72348        | -1.49981         | 0.26189          | 0.00271  |
| H    | 1.4502 | -4.74775         | -0.69138       | 0.46025          | 0.25874          | -0.00765 |
| H    | 1.4502 | -2.97370         | -1.48106       | 2.01445          | 0.25984          | 0.00248  |
| H    | 1.4502 | -0.63413         | -0.89233       | 1.63877          | 0.22775          | -0.00607 |
| H    | 1.4502 | 1.22213          | -0.09007       | 1.34268          | 0.30080          | 0.00150  |
| C    | 1.4502 | -2.05016         | 0.72050        | -1.05208         | -0.18075         | 0.20709  |
| C    | 1.4502 | -3.37100         | 0.37410        | -0.82386         | -0.22292         | -0.09712 |
| C    | 1.4502 | -3.71188         | -0.42222       | 0.28163          | -0.16810         | 0.25652  |
| C    | 1.4502 | -2.70908         | -0.86806       | 1.15881          | -0.21867         | -0.08887 |
| C    | 1.4502 | -1.38312         | -0.53025       | 0.94049          | -0.21191         | 0.19868  |
| C    | 1.4502 | -1.00730         | 0.28050        | -0.17560         | -0.09834         | -0.08508 |
| C    | 1.4502 | 0.32899          | 0.65606        | -0.46776         | -0.29292         | 0.57136  |
| C    | 1.4502 | 1.52379          | 0.46484        | 0.44096          | -0.20369         | -0.01838 |
| C    | 1.4502 | 2.50622          | -0.50418       | -0.21188         | 0.91289          | 0.01225  |
| N    | 1.4502 | 2.23319          | 1.65075        | 0.88188          | -0.86755         | 0.04475  |
| O    | 1.4502 | 3.70804          | -0.60584       | 0.21586          | -0.58052         | 0.00024  |
| O    | 1.4502 | 2.12524          | -1.26427       | -1.17489         | -0.61849         | 0.01641  |

23

| Phe5 |        | E=-554.535230099 | H0=-554.347427 | H298=-554.335439 | G298=-554.386033 |          |
|------|--------|------------------|----------------|------------------|------------------|----------|
| H    | 1.4502 | -2.33975         | 2.22466        | -1.30875         | 0.55749          | 0.00042  |
| H    | 1.4502 | -0.64951         | -1.61875       | -0.81730         | 0.24291          | -0.01595 |
| H    | 1.4502 | -3.48162         | -0.71267       | -0.24758         | 0.54597          | -0.00069 |
| H    | 1.4502 | -2.97794         | -1.18993       | 1.91802          | 0.43988          | 0.00032  |
| H    | 1.4502 | -2.16259         | -2.25572       | 0.96018          | 0.44215          | -0.00030 |
| H    | 1.4502 | 1.59651          | -1.83038       | -1.53046         | 0.24692          | -0.00588 |



| Atom | x      | y      | z      | Occupancy | Displacement |
|------|--------|--------|--------|-----------|--------------|
| H1   | 0.0725 | 0.0725 | 0.0725 | 1.00000   | 0.00254      |
| H2   | 0.0725 | 0.0725 | 0.0725 | 1.00000   | 0.00695      |
| H3   | 0.0725 | 0.0725 | 0.0725 | 1.00000   | 0.00232      |
| H4   | 0.0725 | 0.0725 | 0.0725 | 1.00000   | 0.00566      |
| H5   | 0.0725 | 0.0725 | 0.0725 | 1.00000   | 0.01101      |
| C1   | 0.0725 | 0.0725 | 0.0725 | 1.00000   | 0.19194      |
| C2   | 0.0725 | 0.0725 | 0.0725 | 1.00000   | 0.09059      |
| C3   | 0.0725 | 0.0725 | 0.0725 | 1.00000   | 0.23244      |
| C4   | 0.0725 | 0.0725 | 0.0725 | 1.00000   | 0.08270      |
| C5   | 0.0725 | 0.0725 | 0.0725 | 1.00000   | 0.18492      |
| C6   | 0.0725 | 0.0725 | 0.0725 | 1.00000   | 0.08953      |
| C7   | 0.0725 | 0.0725 | 0.0725 | 1.00000   | 0.56699      |
| C8   | 0.0725 | 0.0725 | 0.0725 | 1.00000   | 0.02605      |
| C9   | 0.0725 | 0.0725 | 0.0725 | 1.00000   | 0.07511      |
| N1   | 0.0725 | 0.0725 | 0.0725 | 1.00000   | 0.01825      |
| O1   | 0.0725 | 0.0725 | 0.0725 | 1.00000   | 0.02122      |
| O2   | 0.0725 | 0.0725 | 0.0725 | 1.00000   | 0.01680      |

23

| Atom    | E              | H0          | H298        | G298        | Displacement |
|---------|----------------|-------------|-------------|-------------|--------------|
| Phe1TS2 | -554.473930897 | -554.291158 | -554.279124 | -554.329746 |              |
| H1      | -0.84261       | -0.72890    | -1.97297    | 0.28378     | 0.02263      |
| H2      | -0.63169       | -2.17333    | -0.97812    | 0.27279     | 0.00100      |
| H3      | -2.06686       | 2.66368     | 0.24492     | 0.56031     | 0.00101      |
| H4      | -3.82229       | -0.87018    | 0.19105     | 0.44952     | -0.00822     |
| H5      | -3.00192       | -2.18639    | -0.55252    | 0.45200     | -0.00890     |
| H6      | 1.05259        | -2.13114    | 0.94811     | 0.24202     | -0.00006     |
| H7      | 3.24724        | -1.27282    | 1.69373     | 0.25700     | -0.00026     |
| H8      | 4.22815        | 0.74726     | 0.62644     | 0.25815     | 0.00011      |
| H9      | 2.99954        | 1.90238     | -1.19991    | 0.25600     | -0.00025     |
| H10     | 0.79754        | 1.05527     | -1.94671    | 0.24283     | -0.00002     |
| H11     | -1.21528       | -0.52522    | 1.32876     | 0.41973     | 0.15193      |
| C1      | 1.46175        | -1.23221    | 0.49156     | -0.23211    | -0.00213     |
| C2      | 2.70565        | -0.75389    | 0.90924     | -0.20624    | 0.00948      |
| C3      | 3.25767        | 0.38104     | 0.30717     | -0.21000    | -0.00388     |
| C4      | 2.56611        | 1.03263     | -0.71628    | -0.21089    | 0.00867      |
| C5      | 1.31869        | 0.55613     | -1.13278    | -0.23429    | -0.00050     |
| C6      | 0.75629        | -0.57564    | -0.52781    | -0.09885    | 0.00167      |
| C7      | -0.60614       | -1.07698    | -0.95812    | -0.47692    | 0.00843      |
| C8      | -1.76055       | -0.62311    | -0.05434    | -0.02231    | 0.28349      |
| C9      | -1.75865       | 0.80145     | 0.42470     | 0.82708     | 0.00503      |
| N1      | -2.96725       | -1.23042    | -0.21639    | -0.69520    | 0.34829      |
| O1      | -2.17535       | 1.82485     | -0.24824    | -0.61842    | 0.00108      |
| O2      | -1.27699       | 0.80963     | 1.58222     | -0.51601    | 0.18139      |

23

| Atom    | E              | H0          | H298        | G298        | Displacement |
|---------|----------------|-------------|-------------|-------------|--------------|
| Phe1TS3 | -554.502555201 | -554.318940 | -554.307097 | -554.357559 |              |
| H1      | -0.66101       | -0.86188    | -1.34448    | 0.29272     | 0.00472      |
| H2      | -0.70137       | -1.74319    | 0.30071     | 0.38983     | 0.04691      |
| H3      | -3.23027       | 2.04738     | -1.12379    | 0.54161     | -0.00013     |
| H4      | -2.77748       | -1.81546    | 0.70683     | 0.46763     | -0.00383     |
| H5      | -1.83198       | -1.59117    | 2.09445     | 0.45442     | -0.00172     |
| H6      | 0.81640        | 0.92294     | 1.68985     | 0.24385     | -0.00384     |
| H7      | 3.20905        | 1.43732     | 1.87536     | 0.26785     | 0.00125      |
| H8      | 4.81433        | 0.58489     | 0.17929     | 0.26473     | -0.00717     |
| H9      | 4.00968        | -0.78737    | -1.73667    | 0.26991     | 0.00187      |
| H10     | 1.60326        | -1.32061    | -1.94498    | 0.25744     | -0.00466     |
| H11     | -1.24501       | 0.56248     | 1.35380     | 0.28462     | 0.00020      |
| C1      | 1.50177        | 0.54119     | 0.94104     | -0.18616    | 0.12712      |
| C2      | 2.84915        | 0.83442     | 1.04825     | -0.21195    | -0.04805     |
| C3      | 3.75796        | 0.35385     | 0.08456     | -0.11734    | 0.24803      |
| C4      | 3.30516        | -0.42343    | -0.99636    | -0.22339    | -0.07005     |
| C5      | 1.95991        | -0.72086    | -1.11270    | -0.15683    | 0.15382      |
| C6      | 1.01760        | -0.23384    | -0.15300    | -0.02385    | 0.05062      |
| C7      | -0.36480       | -0.59194    | -0.32683    | -0.38257    | 0.28411      |
| C8      | -1.53355       | -0.11886    | 0.55273     | -0.17311    | -0.00917     |
| C9      | -2.71306       | 0.46025     | -0.22171    | 0.80441     | -0.00151     |
| N1      | -1.88672       | -1.47201    | 1.08349     | -0.80169    | 0.21744      |
| O1      | -2.46827       | 1.71043     | -0.61716    | -0.68932    | 0.00084      |
| O2      | -3.71665       | -0.17742    | -0.44917    | -0.57279    | 0.01320      |

23

| Atom    | E              | H0          | H298        | G298        | Displacement |
|---------|----------------|-------------|-------------|-------------|--------------|
| Phe1TS4 | -554.509482514 | -554.325527 | -554.313816 | -554.363397 |              |
| H1      | 0.99515        | -0.20608    | -1.33879    | 0.46019     | 0.04881      |
| H2      | 0.49211        | 1.62860     | -0.84411    | 0.26864     | -0.00542     |
| H3      | 4.23158        | -1.19051    | -0.62399    | 0.55301     | -0.00034     |
| H4      | 2.36756        | 2.20587     | 0.76101     | 0.41228     | -0.00206     |
| H5      | 1.69955        | 1.61713     | 2.16968     | 0.42482     | -0.00212     |

| Atom | x        | y        | z        | Occupancy | Displacement |
|------|----------|----------|----------|-----------|--------------|
| H10C | 1.87330  | -1.37200 | 0.25362  | 0.00500   | -0.00524     |
| H11C | 1.23111  | -1.09431 | 0.26688  | 0.00500   | 0.00209      |
| H12C | -4.74286 | -0.74194 | 0.30217  | 0.00500   | -0.00751     |
| H13C | -2.96250 | -2.07309 | 1.41694  | 0.00500   | 0.00174      |
| H14C | -0.60428 | -1.46611 | 1.14742  | 0.00500   | -0.00478     |
| H15C | 1.23406  | -0.45220 | 1.31684  | 0.00500   | 0.00059      |
| C16C | -2.03749 | 1.01250  | -0.76448 | 0.00500   | 0.17094      |
| C17C | -3.36425 | 0.65315  | -0.60955 | 0.00500   | -0.07796     |
| C18C | -3.70194 | -0.45977 | 0.18023  | 0.00500   | 0.25689      |
| C19C | -2.69407 | -1.21290 | 0.81247  | 0.00500   | -0.06558     |
| C20C | -1.36458 | -0.86285 | 0.66153  | 0.00500   | 0.15597      |
| C21C | -0.99376 | 0.26995  | -0.12694 | 0.00500   | 0.01137      |
| C22C | 0.36636  | 0.66019  | -0.35183 | 0.00500   | 0.34870      |
| C23C | 1.54423  | 0.30428  | 0.58511  | 0.00500   | -0.00078     |
| C24C | 2.52386  | -0.42934 | -0.33806 | 0.00500   | -0.00569     |
| N25N | 2.17137  | 1.37334  | 1.30721  | 0.00500   | 0.08094      |
| O26O | 3.72229  | -0.70589 | 0.05531  | 0.00500   | 0.00394      |
| O27O | 2.06993  | -0.75045 | -1.46559 | 0.00500   | 0.09551      |

23

| Atom | x        | y        | z        | Occupancy | Displacement |
|------|----------|----------|----------|-----------|--------------|
| H28H | 1.82519  | -0.59874 | 1.81853  | 0.00500   | 0.00579      |
| H29H | 0.45045  | -2.07126 | 0.24549  | 0.00500   | -0.01704     |
| H30H | 3.14897  | 2.13573  | 0.67453  | 0.00500   | 0.00154      |
| H31H | 2.27745  | -2.31917 | -1.06174 | 0.00500   | 0.00006      |
| H32H | 3.25523  | -1.12864 | -1.67363 | 0.00500   | -0.00050     |
| H33H | -1.85951 | -2.21931 | 0.81415  | 0.00500   | -0.00623     |
| H34H | -4.13585 | -1.27031 | 0.89981  | 0.00500   | 0.00269      |
| H35H | -4.56713 | 1.02693  | 0.04070  | 0.00500   | -0.00736     |
| H36H | -2.70217 | 2.36941  | -0.90963 | 0.00500   | 0.00244      |
| H37H | -0.43415 | 1.45438  | -1.01401 | 0.00500   | -0.00598     |
| H38H | 1.34023  | 0.21244  | -1.56215 | 0.00500   | 0.01425      |
| C39C | -2.04312 | -1.21464 | 0.44368  | 0.00500   | 0.20357      |
| C40C | -3.32093 | -0.68234 | 0.49002  | 0.00500   | -0.09589     |
| C41C | -3.56484 | 0.61267  | 0.00561  | 0.00500   | 0.24631      |
| C42C | -2.51048 | 1.37087  | -0.52988 | 0.00500   | -0.08683     |
| C43C | -1.22702 | 0.85019  | -0.58198 | 0.00500   | 0.19649      |
| C44C | -0.95134 | -0.46502 | -0.09563 | 0.00500   | -0.09431     |
| C45C | 0.33256  | -1.05558 | -0.12833 | 0.00500   | 0.60452      |
| C46C | 1.56894  | -0.41001 | -0.68723 | 0.00500   | -0.02308     |
| C47C | 2.20199  | 0.51661  | 0.35108  | 0.00500   | 0.03896      |
| N48N | 2.63706  | -1.38199 | -0.90980 | 0.00500   | 0.00999      |
| O49O | 2.72365  | 1.62360  | -0.04481 | 0.00500   | 0.00140      |
| O50O | 2.27978  | 0.24463  | 1.60638  | 0.00500   | 0.00922      |

23

| Atom | x        | y        | z        | Occupancy | Displacement |
|------|----------|----------|----------|-----------|--------------|
| H51H | 1.89863  | -2.31138 | 1.09921  | 0.00500   | -0.00140     |
| H52H | 0.27121  | 2.31743  | 0.13582  | 0.00500   | -0.01111     |
| H53H | 3.63411  | -0.38134 | -0.84295 | 0.00500   | -0.00092     |
| H54H | 3.39773  | 1.92041  | 0.03919  | 0.00500   | -0.00076     |
| H55H | 2.34410  | 2.21585  | -1.23041 | 0.00500   | 0.00182      |
| H56H | -2.01761 | 2.24815  | 0.81356  | 0.00500   | -0.00326     |
| H57H | -4.25201 | 1.21240  | 0.62453  | 0.00500   | 0.00139      |
| H58H | -4.48347 | -1.08803 | -0.29625 | 0.00500   | -0.00370     |
| H59H | -2.47210 | -2.33514 | -1.04982 | 0.00500   | 0.00143      |
| H60H | -0.24123 | -1.32628 | -0.86434 | 0.00500   | -0.00302     |
| H61H | 1.19812  | 1.06142  | 1.14577  | 0.00500   | -0.01263     |
| C62C | -2.11630 | 1.24177  | 0.41642  | 0.00500   | 0.10490      |
| C63C | -3.37240 | 0.66075  | 0.30967  | 0.00500   | -0.04981     |
| C64C | -3.50128 | -0.63462 | -0.20841 | 0.00500   | 0.12466      |
| C65C | -2.36598 | -1.34147 | -0.62683 | 0.00500   | -0.04200     |
| C66C | -1.10317 | -0.77312 | -0.51224 | 0.00500   | 0.09794      |
| C67C | -0.95384 | 0.53244  | 0.01554  | 0.00500   | -0.04922     |
| C68C | 0.30402  | 1.23142  | 0.08853  | 0.00500   | 0.35656      |
| C69C | 1.69806  | 0.72355  | 0.03201  | 0.00500   | 0.06106      |
| C70C | 2.12113  | -0.63101 | 0.23784  | 0.00500   | 0.26237      |
| N71N | 2.69645  | 1.52326  | -0.57886 | 0.00500   | 0.03566      |
| O72O | 3.25968  | -1.07314 | -0.25450 | 0.00500   | 0.07369      |
| O73O | 1.43856  | -1.45867 | 0.99980  | 0.00500   | 0.05634      |

23

| Atom | x        | y        | z        | Occupancy | Displacement |
|------|----------|----------|----------|-----------|--------------|
| H74H | -2.39929 | 2.21564  | -1.31546 | 0.00500   | 0.00044      |
| H75H | -0.63646 | -1.59921 | -0.85081 | 0.00500   | -0.01620     |
| H76H | -3.47050 | -0.73344 | -0.14846 | 0.00500   | -0.00074     |
| H77H | -2.92807 | -1.22129 | 1.92830  | 0.00500   | 0.00022      |

| Electronic Supplementary Material            |          | S1500 CCP |          |          |          |
|----------------------------------------------|----------|-----------|----------|----------|----------|
| This journal is (c) The Owner Societies 2008 |          |           |          |          |          |
| H                                            | 3.98948  | -1.14828  | -1.45532 | 0.26087  | 0.00257  |
| H                                            | 4.72572  | 0.64651   | 0.10664  | 0.25788  | -0.00704 |
| H                                            | 3.06498  | 1.78114   | 1.56813  | 0.25870  | 0.00236  |
| H                                            | 0.70269  | 1.15565   | 1.49013  | 0.22998  | -0.00576 |
| H                                            | -1.21627 | 0.29148   | 1.53493  | 0.28846  | 0.01016  |
| C                                            | 1.93214  | -1.02443  | -0.87127 | -0.17316 | 0.19486  |
| C                                            | 3.26515  | -0.65426  | -0.81581 | -0.22629 | -0.09194 |
| C                                            | 3.68065  | 0.35741   | 0.06466  | -0.16865 | 0.23535  |
| C                                            | 2.74226  | 0.99716   | 0.89054  | -0.22211 | -0.08420 |
| C                                            | 1.40487  | 0.63658   | 0.84533  | -0.20043 | 0.18804  |
| C                                            | 0.95668  | -0.39390  | -0.03622 | -0.11027 | -0.09209 |
| C                                            | -0.38065 | -0.83833  | -0.11578 | -0.18836 | 0.57736  |
| C                                            | -1.54049 | -0.28292  | 0.66269  | -0.19143 | -0.02547 |
| C                                            | -2.31207 | 0.62251   | -0.29109 | 0.85891  | 0.06553  |
| N                                            | -2.54504 | -1.32394  | 0.99034  | -0.90540 | 0.01941  |
| O                                            | -3.40851 | 0.16119   | -0.73915 | -0.62356 | 0.01905  |
| O                                            | -1.83681 | 1.76775   | -0.65351 | -0.61673 | 0.01439  |

14

| R+ | (Phe)   | E=-270.677355392 | H0=-270.560284 | H298=-270.553677 | G298=-270.588787 |
|----|---------|------------------|----------------|------------------|------------------|
| H  | 0.00000 | 0.92728          | 2.92333        | 0.25157          |                  |
| H  | 0.00000 | -0.92728         | 2.92333        | 0.25157          |                  |
| H  | 0.00000 | 2.18166          | 0.80702        | 0.27154          |                  |
| H  | 0.00000 | 2.16344          | -1.68454       | 0.28332          |                  |
| H  | 0.00000 | 0.00000          | -2.89086       | 0.27683          |                  |
| H  | 0.00000 | -2.16344         | -1.68454       | 0.28332          |                  |
| H  | 0.00000 | -2.18166         | 0.80702        | 0.27154          |                  |
| C  | 0.00000 | 1.24667          | 0.25456        | -0.07008         |                  |
| C  | 0.00000 | 1.23608          | -1.12224       | -0.24623         |                  |
| C  | 0.00000 | 0.00000          | -1.80401       | -0.03210         |                  |
| C  | 0.00000 | -1.23608         | -1.12224       | -0.24623         |                  |
| C  | 0.00000 | -1.24667         | 0.25456        | -0.07008         |                  |
| C  | 0.00000 | 0.00000          | 0.98386        | -0.17634         |                  |
| C  | 0.00000 | 0.00000          | 2.35537        | -0.04863         |                  |

14

| Rdot | (Phe)   | E=-270.937950637 | H0=-270.823393 | H298=-270.816759 | G298=-270.852430 |
|------|---------|------------------|----------------|------------------|------------------|
| H    | 0.00000 | 0.92850          | 2.96567        | 0.20643          | -0.01967         |
| H    | 0.00000 | -0.92850         | 2.96567        | 0.20643          | -0.01967         |
| H    | 0.00000 | 2.16214          | 0.79329        | 0.23412          | -0.00664         |
| H    | 0.00000 | 2.15454          | -1.67759       | 0.23902          | 0.00290          |
| H    | 0.00000 | 0.00000          | -2.92765       | 0.23700          | -0.00737         |
| H    | 0.00000 | -2.15454         | -1.67759       | 0.23902          | 0.00290          |
| H    | 0.00000 | -2.16214         | 0.79329        | 0.23412          | -0.00664         |
| C    | 0.00000 | 1.21945          | 0.25248        | -0.20329         | 0.21593          |
| C    | 0.00000 | 1.21322          | -1.13495       | -0.24207         | -0.10050         |
| C    | 0.00000 | 0.00000          | -1.84196       | -0.22901         | 0.24157          |
| C    | 0.00000 | -1.21322         | -1.13495       | -0.24207         | -0.10050         |
| C    | 0.00000 | -1.21945         | 0.25248        | -0.20329         | 0.21593          |
| C    | 0.00000 | 0.00000          | 0.99643        | -0.13489         | -0.13809         |
| C    | 0.00000 | 0.00000          | 2.40463        | -0.34152         | 0.71984          |

15

| Rdot+ | (Phe)    | E=-271.273600540 | H0=-271.147923 | H298=-271.140292 | G298=-271.179797 |
|-------|----------|------------------|----------------|------------------|------------------|
| H     | -0.74308 | 2.17539          | -0.01305       | 0.27711          | -0.00301         |
| H     | 1.74312  | 2.17164          | 0.00471        | 0.28365          | -0.00027         |
| H     | 2.97244  | -0.00001         | 0.01690        | 0.27193          | -0.01183         |
| H     | 1.74310  | -2.17165         | 0.00471        | 0.28365          | -0.00027         |
| H     | -0.74310 | -2.17537         | -0.01305       | 0.27711          | -0.00301         |
| C     | -0.18742 | 1.24281          | -0.00821       | 0.17557          | 0.08733          |
| C     | 1.18479  | 1.24140          | 0.00157        | 0.20084          | -0.00554         |
| C     | 1.88602  | -0.00001         | 0.00704        | 0.00270          | 0.42048          |
| C     | 1.18478  | -1.24140         | 0.00157        | 0.20086          | -0.00556         |
| C     | -0.18743 | -1.24280         | -0.00821       | 0.17555          | 0.08737          |
| C     | -0.91817 | 0.00001          | -0.01687       | 0.20210          | 0.36438          |
| C     | -2.39627 | 0.00001          | -0.00091       | 0.71954          | 0.01033          |
| H     | -2.73101 | -0.00025         | 1.05455        | 0.31077          | 0.04235          |
| H     | -2.81969 | 0.89999          | -0.45512       | 0.28166          | 0.00862          |
| H     | -2.81966 | -0.89980         | -0.45549       | 0.28167          | 0.00864          |

#### Optimized geometries for tyrosine as shown in Table 2 and Figure 5b

24

| Tyr1 | E=-629.781272623 | H0=-629.588613 | H298=-629.575050 | G298=-629.629430 |          |
|------|------------------|----------------|------------------|------------------|----------|
| H    | 4.53632          | -1.26280       | -0.05640         | 0.53212          | -0.00306 |
| H    | -1.39925         | 0.55371        | 1.79870          | 0.26675          | 0.00291  |

| Electronic Supplementary Material for PCCP   |          |          |          |          |          |
|----------------------------------------------|----------|----------|----------|----------|----------|
| This journal is (c) The Owner Societies 2008 |          |          |          |          |          |
| H                                            | -3.97871 | 0.78479  | 0.64401  | 0.43451  | -0.00525 |
| H                                            | -3.59089 | 2.16150  | -0.30128 | 0.43116  | -0.00512 |
| H                                            | 0.75569  | 2.37505  | -0.66840 | 0.26016  | -0.00061 |
| H                                            | 3.08082  | 1.70293  | -1.22873 | 0.28124  | -0.00205 |
| H                                            | 2.61006  | -1.88826 | 1.14342  | 0.26444  | -0.00156 |
| H                                            | 0.29652  | -1.23150 | 1.68431  | 0.26206  | -0.00134 |
| H                                            | -1.69872 | 1.10616  | -1.22229 | 0.28020  | 0.00169  |
| C                                            | 1.15949  | 1.44262  | -0.28467 | -0.18827 | 0.00866  |
| C                                            | 2.44769  | 1.08519  | -0.60140 | -0.22654 | 0.06172  |
| C                                            | 2.97698  | -0.13042 | -0.08628 | 0.41448  | 0.16452  |
| C                                            | 2.19219  | -0.96574 | 0.75034  | -0.26795 | 0.04265  |
| C                                            | 0.90156  | -0.59307 | 1.04862  | -0.15944 | 0.03574  |
| C                                            | 0.35017  | 0.62376  | 0.55464  | 0.04168  | 0.21963  |
| C                                            | -1.03153 | 1.02957  | 0.88633  | -0.47174 | 0.02646  |
| C                                            | -2.11231 | 0.67520  | -0.30827 | -0.14160 | 0.04032  |
| C                                            | -2.11014 | -0.84589 | -0.48341 | 0.80666  | 0.00466  |
| N                                            | -3.39698 | 1.19616  | -0.07421 | -0.76351 | 0.23147  |
| O                                            | 4.22753  | -0.42183 | -0.43188 | -0.60392 | 0.12156  |
| O                                            | -3.17288 | -1.43367 | 0.08621  | -0.70411 | 0.00434  |
| O                                            | -1.21001 | -1.43452 | -1.03690 | -0.56206 | 0.04380  |

24

| Tyr2 | E=-629.796182859 | H0=-629.602826 | H298=-629.589661 | G298=-629.642301 |          |
|------|------------------|----------------|------------------|------------------|----------|
| H    | -4.68576         | 0.88288        | 0.18850          | 0.51728          | -0.00002 |
| H    | 1.18045          | -1.37678       | 1.74577          | 0.28494          | 0.01350  |
| H    | 1.12066          | -2.36993       | 0.30299          | 0.27470          | 0.00453  |
| H    | 3.16831          | 2.43127        | -0.47531         | 0.55523          | -0.00211 |
| H    | 0.37717          | 1.14537        | 0.55740          | 0.55254          | -0.00166 |
| H    | 4.07118          | -0.69706       | -0.74892         | 0.45831          | -0.00728 |
| H    | 3.31898          | -2.20591       | -0.34962         | 0.44985          | -0.00791 |
| H    | -0.83489         | -0.30455       | 2.40012          | 0.25652          | 0.00003  |
| H    | -3.09388         | 0.53897        | 1.89859          | 0.25598          | -0.00010 |
| H    | -2.52173         | -0.36802       | -2.26896         | 0.27178          | 0.00006  |
| H    | -0.24511         | -1.20741       | -1.77902         | 0.24870          | -0.00004 |
| C    | -1.18100         | -0.30123       | 1.36915          | -0.23754         | -0.00108 |
| C    | -2.46694         | 0.17100        | 1.09104          | -0.29133         | 0.00453  |
| C    | -2.94610         | 0.14873        | -0.22487         | 0.34022          | 0.00102  |
| C    | -2.13025         | -0.34705       | -1.25765         | -0.24990         | -0.00075 |
| C    | -0.85503         | -0.81210       | -0.97030         | -0.20816         | 0.00036  |
| C    | -0.35155         | -0.79153       | 0.34684          | -0.16130         | 0.00598  |
| C    | 1.03441          | -1.33563       | 0.65769          | -0.49840         | -0.01036 |
| C    | 2.18014          | -0.54776       | 0.06134          | 0.16518          | 0.25752  |
| C    | 2.18664          | 0.86479        | 0.00136          | 0.70823          | 0.26925  |
| N    | 3.26792          | -1.19626       | -0.38511         | -0.70077         | 0.28920  |
| O    | -4.17748         | 0.58297        | -0.57840         | -0.67311         | 0.00087  |
| O    | 1.20565          | 1.65440        | 0.37434          | -0.65162         | 0.10296  |
| O    | 3.27775          | 1.46385        | -0.44887         | -0.66734         | 0.08152  |

24

| Tyr3 | E=-629.786951729 | H0=-629.592718 | H298=-629.579283 | G298=-629.633334 |          |
|------|------------------|----------------|------------------|------------------|----------|
| H    | -5.22591         | -0.47836       | -0.07237         | 0.52030          | -0.00180 |
| H    | 1.11439          | -1.12594       | -1.21807         | 0.24810          | -0.01494 |
| H    | 1.66389          | 1.86697        | -1.57735         | 0.47378          | -0.00068 |
| H    | 3.77873          | -1.57791       | 1.66096          | 0.54343          | -0.00024 |
| H    | 3.15845          | 1.08306        | -1.50838         | 0.48603          | -0.00111 |
| H    | 2.84514          | 2.36559        | -0.50337         | 0.46563          | 0.00549  |
| H    | -0.48779         | 1.50423        | 1.12081          | 0.22896          | -0.00497 |
| H    | -2.90770         | 1.65216        | 1.47072          | 0.27074          | 0.00136  |
| H    | -3.53983         | -1.65108       | -1.22559         | 0.25587          | 0.00173  |
| H    | -1.11853         | -1.82112       | -1.60165         | 0.25087          | -0.00553 |
| H    | 1.55556          | 1.04138        | 0.93829          | 0.28595          | 0.00243  |
| C    | -1.13378         | 0.81143        | 0.58985          | -0.20532         | 0.15606  |
| C    | -2.49277         | 0.90697        | 0.80072          | -0.25384         | -0.05356 |
| C    | -3.37449         | 0.02045        | 0.14660          | 0.35991          | 0.19587  |
| C    | -2.86364         | -0.96441       | -0.72325         | -0.29060         | -0.06692 |
| C    | -1.50284         | -1.05641       | -0.93315         | -0.16680         | 0.17586  |
| C    | -0.57896         | -0.17378       | -0.28797         | -0.10383         | -0.05658 |
| C    | 0.80055          | -0.32769       | -0.55048         | -0.25773         | 0.52634  |
| C    | 1.87952          | 0.48626        | 0.05691          | -0.18877         | 0.00043  |
| C    | 3.12458          | -0.34948       | 0.37755          | 0.80488          | 0.01148  |
| N    | 2.41765          | 1.55210        | -0.96042         | -0.80046         | 0.04668  |
| O    | -4.68848         | 0.17228        | 0.40281          | -0.65574         | 0.07107  |
| O    | 4.08504          | -0.37844       | -0.36687         | -0.59962         | 0.00670  |
| O    | 2.98983          | -1.02429       | 1.51133          | -0.67175         | 0.00483  |

| This journal is (c) The Owner Societies 2008 |                  |                |                  |                  |  |          |
|----------------------------------------------|------------------|----------------|------------------|------------------|--|----------|
|                                              | E=-629.61652058  | H0=-629.554790 | H298=-629.541428 | G298=-629.595227 |  |          |
| H                                            | -5.19769         | -0.02697       | -0.28878         | 0.52069          |  | -0.00189 |
| H                                            | 1.64157          | -0.26916       | -1.67076         | 0.55042          |  | 0.01768  |
| H                                            | 1.00718          | 1.76526        | -0.65705         | 0.24704          |  | -0.01276 |
| H                                            | 4.62649          | -1.21658       | -0.71052         | 0.55606          |  | 0.00070  |
| H                                            | 2.78833          | 2.02446        | 1.13375          | 0.40778          |  | -0.00138 |
| H                                            | 2.21686          | 1.14441        | 2.40560          | 0.42087          |  | -0.00112 |
| H                                            | -1.26053         | 2.12413        | -1.23071         | 0.24974          |  | -0.00552 |
| H                                            | -3.64267         | 1.53863        | -1.11600         | 0.25622          |  | 0.00167  |
| H                                            | -2.68707         | -1.96842       | 1.20228          | 0.27184          |  | 0.00128  |
| H                                            | -0.30328         | -1.41533       | 1.09855          | 0.23186          |  | -0.00490 |
| H                                            | 1.60290          | -0.65095       | 1.17977          | 0.29753          |  | 0.00102  |
| C                                            | -1.56437         | 1.22540        | -0.70188         | -0.17081         |  | 0.17556  |
| C                                            | -2.90372         | 0.90009        | -0.63922         | -0.28949         |  | -0.06492 |
| C                                            | -3.31221         | -0.25948       | 0.05168          | 0.36135          |  | 0.19979  |
| C                                            | -2.34976         | -1.08282       | 0.67471          | -0.25146         |  | -0.05094 |
| C                                            | -1.01258         | -0.75575       | 0.60784          | -0.20439         |  | 0.15403  |
| C                                            | -0.55971         | 0.41471        | -0.08176         | -0.09523         |  | -0.04499 |
| C                                            | 0.79991          | 0.79757        | -0.19871         | -0.34560         |  | 0.50421  |
| C                                            | 1.95105          | 0.21296        | 0.59377          | -0.19758         |  | -0.01481 |
| C                                            | 2.93405          | -0.43418       | -0.37937         | 0.91004          |  | 0.01051  |
| N                                            | 2.67402          | 1.08435        | 1.50238          | -0.86977         |  | 0.04087  |
| O                                            | -4.59870         | -0.64246       | 0.15902          | -0.65358         |  | 0.07462  |
| O                                            | 4.10694          | -0.78494       | -0.00188         | -0.58429         |  | 0.00037  |
| O                                            | 2.56598          | -0.66647       | -1.58529         | -0.61924         |  | 0.02092  |
| 24                                           |                  |                |                  |                  |  |          |
|                                              | E=-629.766526742 | H0=-629.573744 | H298=-629.560661 | G298=-629.613539 |  |          |
| Tyr5                                         |                  |                |                  |                  |  |          |
| H                                            | -2.49028         | 2.26925        | -1.33643         | 0.55461          |  | 0.00040  |
| H                                            | -1.18308         | -1.67693       | -0.71378         | 0.24521          |  | -0.01343 |
| H                                            | -3.90116         | -0.57548       | -0.45430         | 0.55494          |  | -0.00062 |
| H                                            | -3.58915         | -0.97101       | 1.88279          | 0.43268          |  | 0.00059  |
| H                                            | -2.72272         | -2.15050       | 1.12470          | 0.43576          |  | 0.00012  |
| H                                            | 1.04818          | -2.00305       | -1.45587         | 0.25060          |  | -0.00494 |
| H                                            | 3.44263          | -1.45061       | -1.43391         | 0.25621          |  | 0.00157  |
| H                                            | 2.71722          | 1.66173        | 1.46066          | 0.27188          |  | 0.00120  |
| H                                            | 0.31962          | 1.13466        | 1.45809          | 0.23758          |  | -0.00439 |
| H                                            | -1.66190         | 0.33166        | 1.59428          | 0.28065          |  | 0.01327  |
| H                                            | 5.07511          | -0.03877       | -0.49767         | 0.52073          |  | -0.00161 |
| C                                            | 1.40640          | -1.20132       | -0.81681         | -0.15696         |  | 0.15646  |
| C                                            | 2.75108          | -0.89513       | -0.80609         | -0.29558         |  | -0.06052 |
| C                                            | 3.22593          | 0.14340        | 0.02202          | 0.36789          |  | 0.17426  |
| C                                            | 2.32710          | 0.86577        | 0.83579          | -0.25781         |  | -0.04659 |
| C                                            | 0.98456          | 0.55595        | 0.82571          | -0.18674         |  | 0.13858  |
| C                                            | 0.46813          | -0.49596       | 0.00330          | -0.12005         |  | -0.05225 |
| C                                            | -0.88236         | -0.88881       | -0.02666         | -0.20046         |  | 0.47324  |
| C                                            | -2.01049         | -0.24423       | 0.73118          | -0.18478         |  | -0.02597 |
| C                                            | -2.60655         | 0.67936        | -0.30592         | 0.83521          |  | 0.11671  |
| N                                            | -3.08415         | -1.20477       | 1.03070          | -0.92234         |  | 0.01477  |
| O                                            | -3.64335         | 0.27480        | -0.95308         | -0.64088         |  | 0.03154  |
| O                                            | -2.05908         | 1.82123        | -0.58351         | -0.62509         |  | 0.02444  |
| O                                            | 4.52140          | 0.50250        | 0.08427          | -0.65325         |  | 0.06313  |
| 24                                           |                  |                |                  |                  |  |          |
|                                              | E=-629.700441576 | H0=-629.513660 | H298=-629.553876 | G298=-629.553876 |  |          |
| Tyr1TS2                                      |                  |                |                  |                  |  |          |
| H                                            | 4.50813          | 1.15903        | -0.17912         | 0.51458          |  | -0.00009 |
| H                                            | -1.36647         | -0.97639       | -1.86723         | 0.28256          |  | 0.02590  |
| H                                            | -1.22865         | -2.28126       | -0.68455         | 0.27219          |  | 0.00067  |
| H                                            | -2.08405         | 2.77793        | 0.14242          | 0.55949          |  | 0.00084  |
| H                                            | -4.30660         | -0.46552       | 0.19495          | 0.44874          |  | -0.00790 |
| H                                            | -3.66023         | -1.93722       | -0.41531         | 0.45129          |  | -0.00866 |
| H                                            | 0.58297          | -2.13403       | 1.12495          | 0.24380          |  | 0.00002  |
| H                                            | 2.87730          | -1.35500       | 1.64208          | 0.26842          |  | -0.00042 |
| H                                            | 2.65121          | 1.47223        | -1.59262         | 0.24978          |  | 0.00004  |
| H                                            | 0.36665          | 0.70863        | -2.10990         | 0.24390          |  | -0.00014 |
| H                                            | -1.68637         | -0.41357       | 1.41716          | 0.42281          |  | 0.14511  |
| C                                            | 1.01797          | -1.32677       | 0.53971          | -0.21191         |  | -0.00391 |
| C                                            | 2.30768          | -0.90360       | 0.83709          | -0.24992         |  | 0.01541  |
| C                                            | 2.90072          | 0.11580        | 0.07388          | 0.33585          |  | 0.00277  |
| C                                            | 2.19122          | 0.69797        | -0.98432         | -0.29783         |  | -0.00190 |
| C                                            | 0.89513          | 0.26495        | -1.26906         | -0.21189         |  | 0.00381  |
| C                                            | 0.28778          | -0.74600       | -0.51136         | -0.13226         |  | 0.00258  |
| C                                            | -1.11869         | -1.19853       | -0.81994         | -0.47377         |  | 0.00787  |
| C                                            | -2.22280         | -0.53344       | 0.02723          | -0.02684         |  | 0.28931  |
| C                                            | -2.02772         | 0.90360        | 0.41849          | 0.82922          |  | 0.00424  |

Electronic Supplementary Material for PCCP  
 This journal is (c) The Owner Societies 2008

|   |          |         |          |          |         |
|---|----------|---------|----------|----------|---------|
| O | -2.30250 | 1.93717 | -0.30902 | -0.61807 | 0.00122 |
| O | -1.55293 | 0.91133 | 1.58066  | -0.52046 | 0.18030 |

24

| Tyr1TS3 | E=-629.739219026 | H0=-629.550734 | H298=-629.537862 | G298=-629.590662 |          |
|---------|------------------|----------------|------------------|------------------|----------|
| H       | 5.18761          | 0.05415        | -0.50633         | 0.52801          | -0.00243 |
| H       | -1.13579         | -0.99950       | -1.26915         | 0.28504          | 0.00405  |
| H       | -1.23872         | -1.74028       | 0.48497          | 0.39590          | 0.05144  |
| H       | -3.56460         | 2.06172        | -1.23896         | 0.53957          | -0.00011 |
| H       | -3.28413         | -1.68984       | 0.83476          | 0.46480          | -0.00282 |
| H       | -2.38275         | -1.37854       | 2.22433          | 0.45144          | -0.00030 |
| H       | 0.44261          | 0.95769        | 1.61248          | 0.24710          | -0.00262 |
| H       | 2.86045          | 1.39172        | 1.74536          | 0.27870          | -0.00045 |
| H       | 3.52473          | -1.08307       | -1.73401         | 0.26328          | 0.00029  |
| H       | 1.11008          | -1.53257       | -1.88053         | 0.26028          | -0.00354 |
| H       | -1.63682         | 0.65038        | 1.31439          | 0.28139          | -0.00001 |
| C       | 1.10174          | 0.50111        | 0.88239          | -0.18586         | 0.07866  |
| C       | 2.45048          | 0.75472        | 0.96929          | -0.23927         | 0.00681  |
| C       | 3.33791          | 0.18165        | 0.02437          | 0.39555          | 0.18154  |
| C       | 2.84216          | -0.64902       | -1.00869         | -0.28374         | -0.02037 |
| C       | 1.49091          | -0.89627       | -1.08730         | -0.15376         | 0.11001  |
| C       | 0.56843          | -0.32555       | -0.15302         | -0.02718         | 0.09196  |
| C       | -0.82022         | -0.66096       | -0.27905         | -0.41185         | 0.24776  |
| C       | -1.96290         | -0.07241       | 0.56577          | -0.17084         | -0.00451 |
| C       | -3.11140         | 0.50790        | -0.25109         | 0.80440          | -0.00081 |
| N       | -2.38481         | -1.36211       | 1.20467          | -0.82733         | 0.15623  |
| O       | 4.63318          | 0.47277        | 0.17085          | -0.62648         | 0.09630  |
| O       | -2.82037         | 1.73020        | -0.70359         | -0.69134         | 0.00100  |
| O       | -4.13428         | -0.10348       | -0.46676         | -0.57781         | 0.01191  |

24

| Tyr1TS4 | E=-629.744107963 | H0=-629.555429 | H298=-629.542621 | G298=-629.594798 |          |
|---------|------------------|----------------|------------------|------------------|----------|
| H       | -5.18686         | 0.00545        | -0.21642         | 0.52479          | -0.00223 |
| H       | 1.47202          | -0.05811       | -1.39631         | 0.47562          | 0.04468  |
| H       | 1.00382          | 1.75965        | -0.64093         | 0.26315          | -0.00554 |
| H       | 4.58367          | -1.28862       | -0.72858         | 0.55210          | -0.00024 |
| H       | 2.88154          | 2.04127        | 1.01975          | 0.40820          | -0.00144 |
| H       | 2.18797          | 1.32294        | 2.34388          | 0.42081          | -0.00146 |
| H       | -1.25051         | 2.14887        | -1.18284         | 0.25542          | -0.00442 |
| H       | -3.63967         | 1.58920        | -1.02607         | 0.26000          | 0.00081  |
| H       | -2.66424         | -2.02233       | 1.12819          | 0.27572          | 0.00036  |
| H       | -0.27167         | -1.48987       | 0.97399          | 0.24053          | -0.00365 |
| H       | 1.61384          | -0.59716       | 1.25648          | 0.28937          | 0.00063  |
| C       | -1.55499         | 1.23653        | -0.67873         | -0.16211         | 0.13917  |
| C       | -2.89472         | 0.92661        | -0.59390         | -0.28591         | -0.03753 |
| C       | -3.29663         | -0.25671       | 0.06542          | 0.38151          | 0.19239  |
| C       | -2.32763         | -1.11916       | 0.63102          | -0.24554         | -0.02074 |
| C       | -0.99162         | -0.80360       | 0.53987          | -0.19437         | 0.11271  |
| C       | -0.54806         | 0.39079        | -0.11234         | -0.04513         | 0.03725  |
| C       | 0.82599          | 0.74733        | -0.26946         | -0.42626         | 0.33762  |
| C       | 1.96925          | 0.22239        | 0.61821          | -0.17379         | -0.00222 |
| C       | 2.92392          | -0.45794       | -0.36942         | 0.87992          | -0.00144 |
| N       | 2.66626          | 1.15522        | 1.46646          | -0.85833         | 0.05287  |
| O       | -4.57801         | -0.62801       | 0.19337          | -0.63799         | 0.08821  |
| O       | 4.09375          | -0.85711       | -0.00103         | -0.60406         | 0.00248  |
| O       | 2.48093          | -0.61679       | -1.53988         | -0.59367         | 0.07175  |

| Tyr4TS5 | E=-629.746369518 | H0=-629.554373 | H298=-629.541595 | G298=-629.593649 |          |
|---------|------------------|----------------|------------------|------------------|----------|
| H       | 5.08617          | -0.13195       | 0.35821          | 0.51987          | -0.00175 |
| H       | -2.27008         | 0.55472        | 1.80356          | 0.56212          | 0.00658  |
| H       | -1.01465         | 2.07663        | 0.26076          | 0.24100          | -0.01536 |
| H       | -3.45379         | -2.26054       | 0.70591          | 0.55582          | 0.00154  |
| H       | -2.80537         | 2.19925        | -1.13170         | 0.42260          | 0.00038  |
| H       | -3.71433         | 0.94117        | -1.71235         | 0.42277          | -0.00039 |
| H       | 1.29113          | 2.39660        | 0.82004          | 0.24889          | -0.00557 |
| H       | 3.62634          | 1.63816        | 0.88645          | 0.25528          | 0.00182  |
| H       | 2.48497          | -2.10393       | -0.92264         | 0.27043          | 0.00141  |
| H       | 0.14290          | -1.37365       | -1.00416         | 0.23203          | -0.00503 |
| H       | -1.72136         | -0.27880       | -1.54406         | 0.27372          | 0.01212  |
| C       | 1.54282          | 1.40953        | 0.44292          | -0.16793         | 0.17716  |
| C       | 2.85658          | 0.98746        | 0.47996          | -0.29205         | -0.06939 |
| C       | 3.19860          | -0.28793       | -0.01361         | 0.35810          | 0.19439  |
| C       | 2.19771          | -1.12885       | -0.54433         | -0.25354         | -0.05453 |
| C       | 0.88622          | -0.70479       | -0.58014         | -0.20735         | 0.15920  |
| C       | 0.50192          | 0.58459        | -0.09003         | -0.11204         | -0.06396 |

|                                              |          |          |          |          |
|----------------------------------------------|----------|----------|----------|----------|
| Electronic Supplementary Material            | 1.07399  | -0.11650 | -0.26984 | 0.54338  |
| CCP                                          | 0.34641  | -0.68653 | -0.18730 | -0.02070 |
| This journal is (c) The Owner Societies 2008 | -2.59978 | -0.59534 | 0.35860  | 0.04480  |
| C                                            | -3.12130 | 1.25152  | -0.94947 | -0.89165 |
| N                                            | 4.45758  | -0.76955 | -0.01080 | -0.65710 |
| O                                            | -3.05944 | -1.73632 | -0.02183 | -0.60807 |
| O                                            | -2.69385 | -0.31023 | 1.61066  | -0.62592 |
| O                                            |          |          |          | 0.01101  |

24

|         |                  |                |                  |                  |          |
|---------|------------------|----------------|------------------|------------------|----------|
| Tyr5TS2 | E=-629.716258979 | H0=-629.527628 | H298=-629.514585 | G298=-629.566631 |          |
| H       | 2.16896          | -2.37344       | 1.10578          | 0.55029          | -0.00135 |
| H       | 0.85871          | 2.35429        | 0.13093          | 0.27548          | -0.00982 |
| H       | 4.00498          | -0.58456       | -0.86979         | 0.55387          | -0.00101 |
| H       | 3.92633          | 1.74400        | -0.01975         | 0.43314          | -0.00078 |
| H       | 2.88161          | 2.08052        | -1.28476         | 0.43428          | 0.00172  |
| H       | -1.42889         | 2.49307        | 0.78637          | 0.25131          | -0.00286 |
| H       | -3.73330         | 1.64898        | 0.64506          | 0.25678          | 0.00090  |
| H       | -2.27724         | -2.09905       | -0.90576         | 0.27147          | 0.00067  |
| H       | 0.03708          | -1.27381       | -0.76731         | 0.24270          | -0.00242 |
| H       | 1.69680          | 1.04183        | 1.13381          | 0.38963          | -0.00082 |
| H       | -5.06120         | -0.20355       | 0.05840          | 0.52077          | -0.00105 |
| C       | -1.60581         | 1.48411        | 0.42485          | -0.15356         | 0.08956  |
| C       | -2.90330         | 1.01431        | 0.34723          | -0.29804         | -0.03524 |
| C       | -3.14229         | -0.29167       | -0.12308         | 0.37205          | 0.10230  |
| C       | -2.06480         | -1.10716       | -0.52240         | -0.26227         | -0.01947 |
| C       | -0.77023         | -0.63484       | -0.43352         | -0.17062         | 0.07674  |
| C       | -0.49982         | 0.67502        | 0.04538          | -0.13663         | -0.02559 |
| C       | 0.80400          | 1.26895        | 0.09375          | -0.25487         | 0.30653  |
| C       | 2.15614          | 0.65482        | 0.01168          | -0.12211         | 0.04523  |
| C       | 2.48645          | -0.72006       | 0.22309          | 0.71622          | 0.27448  |
| N       | 3.19805          | 1.37802        | -0.62553         | -0.89091         | 0.03107  |
| O       | 3.59127          | -1.24528       | -0.27285         | -0.66429         | 0.07415  |
| O       | 1.75494          | -1.49914       | 0.99731          | -0.65964         | 0.05590  |
| O       | -4.37398         | -0.82250       | -0.22899         | -0.65504         | 0.04116  |

24

|         |                  |                |                  |                  |          |
|---------|------------------|----------------|------------------|------------------|----------|
| Tyr5TS3 | E=-629.766052616 | H0=-629.575513 | H298=-629.562971 | G298=-629.614789 |          |
| H       | 5.13006          | -0.01200       | -0.47060         | 0.51966          | -0.00164 |
| H       | -3.88444         | -0.67393       | -0.06055         | 0.52662          | -0.00080 |
| H       | -1.13798         | -1.60010       | -0.83744         | 0.24112          | -0.01458 |
| H       | -2.78036         | 2.22403        | -1.37832         | 0.55505          | 0.00041  |
| H       | -2.66104         | -2.17929       | 0.97446          | 0.44724          | 0.00000  |
| H       | -3.38569         | -1.07951       | 1.97158          | 0.44484          | 0.00030  |
| H       | 1.10597          | -1.91576       | -1.55533         | 0.24899          | -0.00533 |
| H       | 3.50114          | -1.37535       | -1.48258         | 0.25503          | 0.00175  |
| H       | 2.75493          | 1.61575        | 1.53013          | 0.27062          | 0.00139  |
| H       | 0.35741          | 1.10459        | 1.47508          | 0.23345          | -0.00481 |
| H       | -1.61247         | 0.35182        | 1.52520          | 0.28574          | 0.00968  |
| C       | 1.45904          | -1.14322       | -0.87853         | -0.16292         | 0.16934  |
| C       | 2.80528          | -0.84334       | -0.83927         | -0.29411         | -0.06650 |
| C       | 3.27585          | 0.15609        | 0.03688          | 0.36137          | 0.18479  |
| C       | 2.37017          | 0.84725        | 0.86859          | -0.25691         | -0.05345 |
| C       | 1.02575          | 0.54535        | 0.82839          | -0.19311         | 0.15157  |
| C       | 0.51314          | -0.46880       | -0.04190         | -0.11493         | -0.06377 |
| C       | -0.84017         | -0.85185       | -0.10556         | -0.22443         | 0.51985  |
| C       | -1.96418         | -0.23064       | 0.66974          | -0.18617         | -0.02345 |
| C       | -2.72397         | 0.66609        | -0.30186         | 0.84628          | 0.07344  |
| N       | -3.01020         | -1.22486       | 1.03583          | -0.89714         | 0.01948  |
| O       | 4.57390          | 0.50605        | 0.12950          | -0.65670         | 0.06482  |
| O       | -2.22072         | 1.78875        | -0.70652         | -0.62283         | 0.01531  |
| O       | -3.83338         | 0.21173        | -0.71815         | -0.62676         | 0.02226  |

15

|    |          |                  |                |                  |                  |
|----|----------|------------------|----------------|------------------|------------------|
| R+ | (Tyr)    | E=-345.922816570 | H0=-345.800891 | H298=-345.793356 | G298=-345.831421 |
| H  | -0.79676 | 3.11424          | 0.00000        | 0.53878          |                  |
| H  | 0.93719  | -3.37323         | 0.00000        | 0.24948          |                  |
| H  | -0.91607 | -3.37606         | 0.00000        | 0.24837          |                  |
| H  | -2.17360 | -1.25506         | 0.00000        | 0.27327          |                  |
| H  | -2.17662 | 1.21806          | 0.00000        | 0.27444          |                  |
| H  | 2.16107  | 1.25296          | 0.00000        | 0.29202          |                  |
| H  | 2.18941  | -1.24001         | 0.00000        | 0.27356          |                  |
| C  | -1.23782 | -0.70422         | 0.00000        | -0.07725         |                  |
| C  | -1.24400 | 0.66110          | 0.00000        | -0.30620         |                  |
| C  | 0.00000  | 1.36061          | 0.00000        | 0.47463          |                  |
| C  | 1.24734  | 0.66904          | 0.00000        | -0.27450         |                  |
| C  | 1.25041  | -0.69485         | 0.00000        | -0.08749         |                  |
| C  | 0.00855  | -1.44228         | 0.00000        | -0.16877         |                  |

|      |          | -2.80721         | 0.00000        | -0.11248         |                  |
|------|----------|------------------|----------------|------------------|------------------|
|      |          | 2.67575          | 0.00000        | -0.59786         |                  |
| 15   |          |                  |                |                  |                  |
| Rdot | (Tyr)    | E=-346.164016607 | H0=-346.045490 | H298=-346.037626 | G298=-346.076719 |
| H    | -0.83459 | 3.11547          | 0.00000        | 0.50334          | -0.00116         |
| H    | 0.94985  | -3.42500         | 0.00000        | 0.20669          | -0.01927         |
| H    | -0.90723 | -3.43520         | 0.00000        | 0.20597          | -0.01925         |
| H    | -2.15147 | -1.25602         | 0.00000        | 0.23580          | -0.00675         |
| H    | -2.15661 | 1.20932          | 0.00000        | 0.23332          | 0.00259          |
| H    | 2.14599  | 1.24440          | 0.00000        | 0.25163          | 0.00265          |
| H    | 2.17160  | -1.23520         | 0.00000        | 0.23636          | -0.00628         |
| C    | -1.20727 | -0.71849         | 0.00000        | -0.18981         | 0.21523          |
| C    | -1.21222 | 0.66842          | 0.00000        | -0.31151         | -0.09268         |
| C    | 0.00000  | 1.37705          | 0.00000        | 0.31020          | 0.20456          |
| C    | 1.21947  | 0.67920          | 0.00000        | -0.28102         | -0.09435         |
| C    | 1.22359  | -0.70428         | 0.00000        | -0.19055         | 0.19905          |
| C    | 0.01105  | -1.46275         | 0.00000        | -0.14677         | -0.13410         |
| C    | 0.01828  | -2.86956         | 0.00000        | -0.36679         | 0.70447          |
| O    | 0.05814  | 2.74559          | 0.00000        | -0.69685         | 0.04528          |

|       |          | E=-346.523845458 |          |          |          |
|-------|----------|------------------|----------|----------|----------|
| 16    |          |                  |          |          |          |
| Rdot+ | (Tyr)    | E=-346.523845458 |          |          |          |
| H     | -3.20081 | -0.76840         | 0.00949  | 0.54248  | -0.00447 |
| H     | 1.18023  | -2.16674         | -0.01426 | 0.27702  | -0.00106 |
| H     | -1.29312 | -2.17248         | -0.00034 | 0.27397  | -0.00290 |
| H     | -1.29575 | 2.17361          | 0.00031  | 0.29002  | -0.00394 |
| H     | 1.19879  | 2.17068          | -0.01419 | 0.27860  | 0.00018  |
| C     | 0.63302  | -1.22909         | -0.00958 | -0.17523 | 0.02159  |
| C     | -0.73705 | -1.23897         | -0.00167 | -0.25006 | 0.08188  |
| C     | -1.43532 | 0.00839          | 0.00206  | 0.44254  | 0.22212  |
| C     | -0.72378 | 1.25171          | -0.00151 | -0.19549 | 0.12243  |
| C     | 0.64686  | 1.23629          | -0.00915 | -0.19948 | -0.02410 |
| C     | 1.36978  | 0.00355          | -0.01347 | 0.15113  | 0.36191  |
| O     | -2.75011 | 0.09499          | 0.00794  | -0.56740 | 0.17740  |
| C     | 2.85664  | -0.01481         | 0.00643  | -0.71088 | 0.00002  |
| H     | 3.20383  | -0.20940         | 1.03495  | 0.29436  | 0.03290  |
| H     | 3.25863  | -0.82661         | -0.60876 | 0.27749  | 0.01259  |
| H     | 3.28816  | 0.93692          | -0.30931 | 0.27092  | 0.00346  |

Optimized geometries for tryptophan as shown in Table 2 and Figure 5a

|      |          | E=-686.156485818 | H0=-685.937176 | H298=-685.923184 | G298=-685.978498 |  |
|------|----------|------------------|----------------|------------------|------------------|--|
| 27   |          |                  |                |                  |                  |  |
| Trp1 |          | E=-686.156485818 | H0=-685.937176 | H298=-685.923184 | G298=-685.978498 |  |
| H    | -2.15533 | -2.60552         | -0.69351       | 0.42180          | -0.00013         |  |
| H    | -1.03646 | -1.48552         | -1.17661       | 0.40117          | -0.00101         |  |
| H    | -2.94004 | -1.40356         | 1.04768        | 0.27904          | -0.00086         |  |
| H    | -1.74511 | 0.48562          | 2.08160        | 0.27164          | 0.00448          |  |
| H    | -0.84259 | -1.03505         | 2.12321        | 0.28060          | 0.00974          |  |
| H    | -0.62168 | 2.62398          | 0.78394        | 0.27754          | -0.00574         |  |
| H    | 1.59985  | 3.02396          | -0.26259       | 0.47148          | -0.00299         |  |
| H    | 3.88534  | 1.50327          | -1.04383       | 0.26761          | -0.00096         |  |
| H    | 4.73288  | -0.83969         | -1.05166       | 0.26607          | -0.00473         |  |
| H    | 3.37679  | -2.69809         | -0.15814       | 0.26820          | 0.00160          |  |
| H    | 1.10654  | -2.27349         | 0.78365        | 0.27099          | -0.00578         |  |
| H    | -4.47916 | 0.46559          | -1.36940       | 0.53137          | 0.00081          |  |
| C    | -2.17847 | -0.88661         | 0.45795        | -0.15017         | 0.02809          |  |
| C    | -1.18571 | -0.22849         | 1.46899        | -0.48647         | -0.00811         |  |
| C    | -2.88202 | 0.18963          | -0.38155       | 0.80480          | -0.00183         |  |
| C    | -0.01104 | 0.44486          | 0.85101        | 0.05488          | 0.30656          |  |
| C    | 1.20708  | -0.13624         | 0.39659        | -0.13681         | -0.05920         |  |
| C    | 0.10236  | 1.84585          | 0.58960        | 0.13156          | 0.18272          |  |
| C    | 2.01673  | 0.91090          | -0.12556       | 0.15046          | 0.04342          |  |
| C    | 3.27413  | 0.69798          | -0.64926       | -0.20633         | 0.03386          |  |
| C    | 3.74574  | -0.63566         | -0.64984       | -0.14789         | 0.15995          |  |
| C    | 2.97602  | -1.69047         | -0.14210       | -0.24931         | -0.06120         |  |
| C    | 1.70488  | -1.45948         | 0.38974        | -0.10175         | 0.19677          |  |
| N    | -1.52115 | -1.87984         | -0.37565       | -0.86924         | 0.04683          |  |
| N    | 1.28463  | 2.10488          | 0.02300        | -0.50058         | 0.09683          |  |
| O    | -4.08682 | -0.22060         | -0.79948       | -0.68990         | 0.00528          |  |
| O    | -2.39363 | 1.26432          | -0.67918       | -0.61075         | 0.03559          |  |
| 27   |          |                  |                |                  |                  |  |
| Trp2 |          | E=-686.154272740 | H0=-685.935662 | H298=-685.921752 | G298=-685.976077 |  |
| H    | 3.88560  | -1.41274         | -0.74257       | 0.45747          | -0.00726         |  |
| H    | 3.13314  | -0.97837         | -2.24176       | 0.44870          | -0.00788         |  |
| H    | 0.82738  | 1.01163          | 1.07151        | 0.54317          | -0.00189         |  |
| H    | 1.73263  | 1.65102          | -1.61267       | 0.28654          | 0.01514          |  |



| Electronic Supplementary Material for PCCP   |          |          |          |          |          |
|----------------------------------------------|----------|----------|----------|----------|----------|
| This journal is (c) The Owner Societies 2008 |          |          |          |          |          |
| H                                            | -2.48926 | 2.70857  | 0.41249  | 0.45818  | 0.00000  |
| H                                            | -4.21774 | 0.50964  | 0.89369  | 0.25536  | 0.00000  |
| H                                            | -4.28741 | -1.96377 | 0.67379  | 0.25600  | 0.00001  |
| H                                            | -2.35412 | -3.21791 | -0.21962 | 0.25323  | 0.00000  |
| H                                            | -0.28580 | -2.05372 | -0.90834 | 0.23616  | 0.00000  |
| H                                            | 3.31652  | -0.62121 | 2.39215  | 0.55394  | -0.00208 |
| C                                            | 2.28487  | -0.12308 | -0.57901 | 0.16608  | 0.26986  |
| C                                            | 1.27267  | 0.68344  | -1.36646 | -0.49567 | -0.01117 |
| C                                            | 2.38687  | -0.04644 | 0.82848  | 0.70838  | 0.26019  |
| C                                            | -0.05213 | 0.91229  | -0.68376 | -0.21609 | 0.00333  |
| C                                            | -1.06308 | -0.08426 | -0.39206 | -0.10954 | 0.00098  |
| C                                            | -0.60882 | 2.14522  | -0.37426 | -0.01005 | -0.00121 |
| C                                            | -2.19111 | 0.61456  | 0.11148  | 0.14982  | -0.00012 |
| C                                            | -3.36378 | -0.03869 | 0.50846  | -0.24369 | 0.00013  |
| C                                            | -3.39369 | -1.42232 | 0.38136  | -0.21426 | 0.00012  |
| C                                            | -2.28778 | -2.13873 | -0.12701 | -0.23560 | -0.00005 |
| C                                            | -1.12360 | -1.48612 | -0.51244 | -0.21290 | 0.00006  |
| N                                            | 3.16397  | -0.89879 | -1.23381 | -0.70486 | 0.28819  |
| N                                            | -1.87735 | 1.96550  | 0.10772  | -0.54415 | 0.00061  |
| O                                            | 1.59616  | 0.65546  | 1.60228  | -0.64954 | 0.10914  |
| O                                            | 3.35991  | -0.71845 | 1.42414  | -0.66862 | 0.07862  |

27

| Trp3 | E=-686.145581095 | H0=-685.926183 | H298=-685.911891 | G298=-685.967990 |          |
|------|------------------|----------------|------------------|------------------|----------|
| H    | -3.41947         | -0.47899       | 1.85782          | 0.48490          | -0.00112 |
| H    | -3.61152         | 1.16904        | 1.89037          | 0.46268          | 0.00593  |
| H    | -2.28530         | 1.44257        | -0.04637         | 0.28145          | 0.00127  |
| H    | -2.16808         | 0.50372        | 2.41935          | 0.47256          | -0.00056 |
| H    | -1.02948         | -1.36105       | 0.32249          | 0.25108          | -0.01362 |
| H    | -0.23626         | 2.59638        | -0.16898         | 0.23690          | -0.00928 |
| H    | 2.22017          | 2.87611        | -0.37978         | 0.45775          | -0.00407 |
| H    | 4.57253          | 1.30610        | -0.34797         | 0.25476          | -0.00084 |
| H    | 5.30904          | -1.05979       | -0.12330         | 0.25606          | 0.00014  |
| H    | 3.66536          | -2.87437       | 0.21500          | 0.25458          | -0.00065 |
| H    | 1.24227          | -2.39007       | 0.34098          | 0.24378          | -0.00011 |
| H    | -3.98807         | -0.64919       | -2.29107         | 0.54220          | -0.00020 |
| C    | -2.33380         | 0.40169        | 0.27722          | -0.18204         | 0.00194  |
| C    | -1.02108         | -0.27713       | 0.25630          | -0.29298         | 0.47727  |
| C    | -3.39611         | -0.36625       | -0.51570         | 0.80165          | 0.01316  |
| C    | 0.20358          | 0.38383        | 0.09164          | -0.10380         | -0.02141 |
| C    | 1.52141          | -0.25290       | 0.06816          | -0.10098         | 0.03126  |
| C    | 0.45260          | 1.76706        | -0.09485         | 0.00305          | 0.30350  |
| C    | 2.48023          | 0.76573        | -0.12564         | 0.14754          | -0.01972 |
| C    | 3.84936          | 0.51064        | -0.19820         | -0.24299         | 0.02541  |
| C    | 4.25239          | -0.81844       | -0.07113         | -0.20491         | -0.00537 |
| C    | 3.31621          | -1.85130       | 0.12200          | -0.23588         | 0.02058  |
| C    | 1.95063          | -1.58032       | 0.19387          | -0.18233         | 0.00591  |
| N    | -2.92604         | 0.42072        | 1.73640          | -0.80436         | 0.04407  |
| N    | 1.79130          | 1.97588        | -0.21887         | -0.52354         | 0.13314  |
| O    | -3.33826         | -0.09960       | -1.81503         | -0.67434         | 0.00501  |
| O    | -4.15931         | -1.14445       | 0.02337          | -0.60280         | 0.00837  |

27

| Trp4 | E=-686.106323026 | H0=-685.889436 | H298=-685.875255 | G298=-685.930851 |          |
|------|------------------|----------------|------------------|------------------|----------|
| H    | -2.67917         | 0.39689        | 2.62104          | 0.41878          | -0.00096 |
| H    | -2.88471         | -1.15797       | 2.11838          | 0.40654          | -0.00112 |
| H    | -2.30925         | 1.24900        | 0.55448          | 0.29088          | 0.00092  |
| H    | -0.91374         | -1.51050       | 0.54671          | 0.25336          | -0.00996 |
| H    | -1.80708         | -0.76271       | -1.40301         | 0.53999          | 0.02413  |
| H    | -0.42440         | 2.47860        | 0.00831          | 0.23973          | -0.00909 |
| H    | 2.00097          | 2.93675        | -0.23404         | 0.45914          | -0.00428 |
| H    | 4.45439          | 1.53144        | -0.32756         | 0.25588          | -0.00084 |
| H    | 5.35722          | -0.78369       | -0.20076         | 0.25706          | 0.00002  |
| H    | 3.84992          | -2.71962       | 0.09722          | 0.25544          | -0.00059 |
| H    | 1.40118          | -2.41066       | 0.27578          | 0.24347          | -0.00032 |
| H    | -5.05051         | -0.20699       | -1.29713         | 0.55440          | 0.00036  |
| C    | -2.37044         | 0.15139        | 0.60586          | -0.18777         | -0.01147 |
| C    | -1.01601         | -0.45609       | 0.28978          | -0.39543         | 0.43781  |
| C    | -3.30978         | -0.18407       | -0.55418         | 0.90507          | 0.00783  |
| C    | 0.16836          | 0.29033        | 0.14386          | -0.08721         | 0.00465  |
| C    | 1.52625          | -0.25135       | 0.07275          | -0.10556         | 0.02562  |
| C    | 0.31927          | 1.69454        | 0.00778          | 0.00812          | 0.29757  |
| C    | 2.40904          | 0.83771        | -0.09739         | 0.14762          | -0.01830 |
| C    | 3.79042          | 0.68253        | -0.19872         | -0.24053         | 0.02599  |

|                                              |          |          |          |          |          |
|----------------------------------------------|----------|----------|----------|----------|----------|
| Electronic Supplementary Material for PCCP   |          | -0.61940 | -0.12618 | -0.20287 | -0.00119 |
| This journal is (c) The Owner Societies 2008 |          | -1.72113 | 0.04317  | -0.23464 | 0.01844  |
| C                                            | 2.04874  | -1.54894 | 0.14387  | -0.18061 | 0.01334  |
| N                                            | -3.01769 | -0.18366 | 1.86150  | -0.87280 | 0.03313  |
| N                                            | 1.63587  | 2.00020  | -0.13232 | -0.51932 | 0.14108  |
| O                                            | -2.80407 | -0.65404 | -1.62978 | -0.61925 | 0.02687  |
| O                                            | -4.57271 | 0.02787  | -0.47613 | -0.58946 | 0.00040  |

27

|      |                  |                |                  |                  |          |
|------|------------------|----------------|------------------|------------------|----------|
| Trp5 | E=-686.126455948 | H0=-685.908201 | H298=-685.894303 | G298=-685.948903 |          |
| H    | 2.80196          | -1.36688       | -2.15336         | 0.43263          | 0.00041  |
| H    | 4.06313          | -0.31739       | -1.98714         | 0.42834          | 0.00080  |
| H    | 2.40049          | 1.12696        | -1.14249         | 0.27244          | 0.01454  |
| H    | 3.90082          | -1.38439       | 0.21023          | 0.55655          | -0.00071 |
| H    | 1.05708          | -1.56190       | -0.38647         | 0.25052          | -0.01148 |
| H    | 0.44585          | 2.43085        | -0.68325         | 0.24496          | -0.00771 |
| H    | -1.97026         | 2.88517        | -0.35876         | 0.45979          | -0.00347 |
| H    | -4.37322         | 1.48469        | 0.14617          | 0.25580          | -0.00073 |
| H    | -5.21753         | -0.82654       | 0.52039          | 0.25705          | 0.00011  |
| H    | -3.67847         | -2.75963       | 0.48764          | 0.25543          | -0.00054 |
| H    | -1.25720         | -2.45478       | 0.07959          | 0.24421          | -0.00013 |
| H    | 2.96137          | 0.86931        | 2.40483          | 0.55193          | 0.00060  |
| C    | 2.44591          | 0.10602        | -0.74636         | -0.17814         | -0.02552 |
| C    | 1.08089          | -0.48488       | -0.53003         | -0.21617         | 0.39473  |
| C    | 2.97053          | 0.11158        | 0.66428          | 0.81315          | 0.15237  |
| C    | -0.09607         | 0.24732        | -0.38790         | -0.12548         | -0.01326 |
| C    | -1.42900         | -0.29816       | -0.11592         | -0.09246         | 0.02464  |
| C    | -0.27818         | 1.65010        | -0.50113         | 0.03572          | 0.25394  |
| C    | -2.32907         | 0.78893        | -0.09254         | 0.14292          | -0.01685 |
| C    | -3.69631         | 0.63633        | 0.13325          | -0.24011         | 0.02247  |
| C    | -4.16004         | -0.66253       | 0.34120          | -0.20629         | -0.00408 |
| C    | -3.28320         | -1.76281       | 0.32222          | -0.23153         | 0.01717  |
| C    | -1.91809         | -1.59324       | 0.09332          | -0.18461         | 0.00663  |
| N    | 3.32576          | -0.80724       | -1.48551         | -0.92499         | 0.01283  |
| N    | -1.58713         | 1.95043        | -0.32790         | -0.51544         | 0.11393  |
| O    | 2.64734          | 1.05557        | 1.49997          | -0.63611         | 0.02950  |
| O    | 3.70910          | -0.87554       | 1.05932          | -0.65009         | 0.03985  |

27

|         |                  |                |                  |                  |          |
|---------|------------------|----------------|------------------|------------------|----------|
| Trp1TS2 | E=-686.060024014 | H0=-685.847380 | H298=-685.833384 | G298=-685.888372 |          |
| H       | -2.14826         | 2.52661        | 0.67021          | 0.44095          | -0.00573 |
| H       | -1.59420         | 2.67000        | -0.93874         | 0.43954          | -0.00688 |
| H       | -3.54354         | 0.12966        | -0.64705         | 0.43474          | 0.09809  |
| H       | -1.92826         | -0.75277       | -1.99632         | 0.27303          | -0.00003 |
| H       | -1.11027         | 0.76855        | -2.30344         | 0.27046          | -0.00032 |
| H       | -0.52929         | -2.76368       | -0.97224         | 0.25162          | -0.00192 |
| H       | 1.72446          | -3.03402       | 0.07779          | 0.45753          | -0.00148 |
| H       | 3.86847          | -1.41663       | 0.96323          | 0.25556          | -0.00078 |
| H       | 4.57536          | 0.96596        | 1.06280          | 0.25671          | -0.00047 |
| H       | 3.11126          | 2.76053        | 0.20041          | 0.25370          | -0.00014 |
| H       | 0.90728          | 2.24122        | -0.78519         | 0.23283          | -0.00120 |
| H       | -2.58671         | -0.73260       | 2.48583          | 0.55380          | 0.00025  |
| C       | -2.15909         | 0.75762        | -0.43525         | -0.07928         | 0.25922  |
| C       | -1.32147         | 0.02497        | -1.52666         | -0.46314         | 0.00368  |
| C       | -2.61057         | -0.08686       | 0.70665          | 0.81852          | 0.00963  |
| C       | -0.08382         | -0.56887       | -0.93784         | -0.11614         | 0.06777  |
| C       | 1.09440          | 0.10092        | -0.43861         | -0.11114         | -0.01008 |
| C       | 0.11217          | -1.92961       | -0.72049         | 0.01145          | 0.06283  |
| C       | 1.96144          | -0.90903       | 0.05717          | 0.14623          | -0.00465 |
| C       | 3.21546          | -0.62900       | 0.60023          | -0.23177         | 0.02811  |
| C       | 3.60542          | 0.70998        | 0.64937          | -0.20984         | 0.01578  |
| C       | 2.77021          | 1.73121        | 0.15990          | -0.23868         | 0.00407  |
| C       | 1.52256          | 1.44086        | -0.38919         | -0.18484         | 0.03520  |
| N       | -1.81541         | 2.05860        | -0.16318         | -0.74481         | 0.26617  |
| N       | 1.32489          | -2.13025       | -0.13145         | -0.52996         | 0.05178  |
| O       | -2.05363         | -0.18828       | 1.87267          | -0.61883         | 0.00005  |
| O       | -3.69050         | -0.65103       | 0.36402          | -0.56825         | 0.13105  |

27

|         |                  |                |                  |                  |          |
|---------|------------------|----------------|------------------|------------------|----------|
| Trp1TS3 | E=-686.102979031 | H0=-685.889112 | H298=-685.875406 | G298=-685.930266 |          |
| H       | 3.66671          | 0.60550        | -1.95495         | 0.46329          | -0.00241 |
| H       | 2.55329          | -0.63685       | -1.87005         | 0.44997          | 0.00055  |
| H       | 3.34865          | 1.13641        | 0.28035          | 0.27612          | -0.00008 |
| H       | 1.57275          | 2.56894        | -0.07974         | 0.40061          | 0.05341  |
| H       | 1.71100          | 1.22345        | -1.62541         | 0.28284          | 0.00586  |
| H       | -0.74068         | 3.39445        | 0.34133          | 0.25118          | -0.00687 |
| H       | -3.04352         | 2.46411        | 0.53462          | 0.46536          | -0.00448 |

| Atom  | X        | Y        | Z        | Occupancy | Displacement |
|-------|----------|----------|----------|-----------|--------------|
| H1602 | 0.00876  | 0.31246  | 0.26062  | 1.00      | -0.00106     |
| H1603 | -2.39765 | -0.18418 | 0.26166  | 1.00      | -0.00086     |
| H1604 | -1.65026 | -3.19422 | 0.26091  | 1.00      | -0.00015     |
| H1605 | 0.26159  | -1.66171 | 0.25157  | 1.00      | -0.00178     |
| H1606 | 2.16727  | -1.36886 | 2.38729  | 1.00      | -0.00005     |
| C1607 | 2.50705  | 0.58389  | -0.14519 | 1.00      | -0.00174     |
| C1608 | 1.29819  | 1.53480  | -0.28709 | 1.00      | 0.21693      |
| C1609 | 2.38770  | -0.72385 | 0.62068  | 1.00      | -0.00048     |
| C1610 | -0.09020 | 1.27100  | -0.06340 | 1.00      | 0.13223      |
| C1611 | -0.93573 | 0.08328  | -0.14221 | 1.00      | -0.01375     |
| C1612 | -0.97936 | 2.34776  | 0.21080  | 1.00      | 0.22381      |
| C1613 | -2.26543 | 0.50715  | 0.11144  | 1.00      | -0.00941     |
| C1614 | -3.35938 | -0.34809 | 0.11046  | 1.00      | 0.03493      |
| C1615 | -3.11163 | -1.69556 | -0.17245 | 1.00      | 0.02812      |
| C1616 | -1.81325 | -2.14642 | -0.45108 | 1.00      | 0.00295      |
| C1617 | -0.72295 | -1.27324 | -0.44225 | 1.00      | 0.06314      |
| N1618 | 2.74502  | 0.33611  | -1.60988 | 1.00      | 0.11819      |
| N1619 | -2.23651 | 1.89187  | 0.32208  | 1.00      | 0.15105      |
| O1620 | 2.21674  | -0.51124 | 1.92696  | 1.00      | 0.00094      |
| O1621 | 2.45907  | -1.81157 | 0.08852  | 1.00      | 0.01100      |

27

| Atom    | X                | Y              | Z                | Occupancy        | Displacement |
|---------|------------------|----------------|------------------|------------------|--------------|
| Trp1TS4 | E=-686.105798289 | H0=-685.891357 | H298=-685.877721 | G298=-685.931977 |              |
| H1622   | -2.60329         | 0.18583        | 2.66649          | 0.41813          | -0.00105     |
| H1623   | -2.89696         | -1.30732       | 2.02499          | 0.40626          | -0.00110     |
| H1624   | -2.31374         | 1.22091        | 0.65815          | 0.28532          | 0.00058      |
| H1625   | -0.91651         | -1.52647       | 0.45344          | 0.26210          | -0.00508     |
| H1626   | -1.72643         | -0.65196       | -1.25521         | 0.49563          | 0.03939      |
| H1627   | -0.43679         | 2.46972        | 0.05431          | 0.24403          | -0.00831     |
| H1628   | 1.98809          | 2.94521        | -0.12790         | 0.46151          | -0.00441     |
| H1629   | 4.44888          | 1.55092        | -0.23487         | 0.25766          | -0.00090     |
| H1630   | 5.35696          | -0.76615       | -0.18679         | 0.25877          | -0.00033     |
| H1631   | 3.85192          | -2.71584       | 0.00910          | 0.25742          | -0.00042     |
| H1632   | 1.39862          | -2.42092       | 0.16028          | 0.24633          | -0.00088     |
| H1633   | -5.05517         | -0.14034       | -1.30150         | 0.55198          | -0.00015     |
| C1634   | -2.37823         | 0.12413        | 0.62496          | -0.17453         | -0.00466     |
| C1635   | -1.03263         | -0.47142       | 0.19839          | -0.44105         | 0.33989      |
| C1636   | -3.31857         | -0.14706       | -0.55482         | 0.88751          | 0.00121      |
| C1637   | 0.16304          | 0.28002        | 0.11884          | -0.05590         | 0.05890      |
| C1638   | 1.52067          | -0.25503       | 0.04632          | -0.10926         | 0.00907      |
| C1639   | 0.31181          | 1.69044        | 0.04017          | 0.02445          | 0.27167      |
| C1640   | 2.40351          | 0.84148        | -0.06605         | 0.14642          | -0.01398     |
| C1641   | 3.78539          | 0.69610        | -0.15091         | -0.23577         | 0.02832      |
| C1642   | 4.28543          | -0.60808       | -0.12261         | -0.19822         | 0.01031      |
| C1643   | 3.42871          | -1.71711       | -0.01127         | -0.23220         | 0.01258      |
| C1644   | 2.04562          | -1.55322       | 0.07441          | -0.17147         | 0.03229      |
| N1645   | -2.98173         | -0.30753       | 1.86582          | -0.86827         | 0.03621      |
| N1646   | 1.62484          | 2.00381        | -0.06614         | -0.50977         | 0.14676      |
| O1647   | -2.77374         | -0.55839       | -1.62125         | -0.60641         | 0.05269      |
| O1648   | -4.58699         | 0.05850        | -0.46658         | -0.60068         | 0.00140      |

27

| Atom    | X                | Y              | Z                | Occupancy        | Displacement |
|---------|------------------|----------------|------------------|------------------|--------------|
| Trp4TS5 | E=-686.104978887 | H0=-685.887888 | H298=-685.874248 | G298=-685.928362 |              |
| H1649   | 3.92495          | -0.74058       | -1.99801         | 0.42052          | 0.00003      |
| H1650   | 2.62884          | -1.77555       | -1.96600         | 0.42231          | 0.00075      |
| H1651   | 2.36116          | 0.84550        | -1.24632         | 0.26732          | 0.00835      |
| H1652   | 0.86430          | -1.70871       | -0.43132         | 0.24204          | -0.01398     |
| H1653   | 2.28659          | -1.35851       | 1.44467          | 0.56063          | 0.00760      |
| H1654   | 0.54836          | 2.33389        | -0.60157         | 0.23944          | -0.00924     |
| H1655   | -1.83852         | 2.94717        | -0.28099         | 0.45764          | -0.00398     |
| H1656   | -4.33128         | 1.70007        | 0.19082          | 0.25474          | -0.00080     |
| H1657   | -5.33243         | -0.55723       | 0.49438          | 0.25601          | 0.00018      |
| H1658   | -3.92702         | -2.58925       | 0.42037          | 0.25423          | -0.00063     |
| H1659   | -1.48727         | -2.43655       | 0.04321          | 0.24124          | -0.00002     |
| H1660   | 4.41199          | 1.08673        | 1.53751          | 0.55393          | 0.00166      |
| C1661   | 2.37482          | -0.13119       | -0.74405         | -0.18082         | -0.01874     |
| C1662   | 0.98864          | -0.62815       | -0.47227         | -0.30418         | 0.48889      |
| C1663   | 3.12710          | 0.06946        | 0.57004          | 0.90503          | 0.04886      |
| C1664   | -0.13950         | 0.18827        | -0.33601         | -0.11274         | -0.02837     |
| C1665   | -1.50997         | -0.26802       | -0.09283         | -0.09920         | 0.03383      |
| C1666   | -0.22460         | 1.60089        | -0.41983         | 0.00526          | 0.30364      |
| C1667   | -2.33503         | 0.87747        | -0.04880         | 0.14716          | -0.01985     |
| C1668   | -3.71229         | 0.80893        | 0.16103          | -0.24261         | 0.02412      |
| C1669   | -4.26430         | -0.46043       | 0.32953          | -0.20636         | -0.00648     |
| C1670   | -3.46360         | -1.61713       | 0.28811          | -0.23571         | 0.02029      |
| C1671   | -2.08816         | -1.53245       | 0.07734          | -0.18669         | 0.00345      |

Electronic Supplementary Material for PCCP  
 This journal is (c) The Owner Societies 2008

|   |         |          |         |          |         |
|---|---------|----------|---------|----------|---------|
| O | 2.99305 | -0.69307 | 1.60007 | -0.62908 | 0.01307 |
| O | 3.95844 | 1.05013  | 0.67018 | -0.61272 | 0.00320 |

27

|         |                  |                |                  |                  |          |
|---------|------------------|----------------|------------------|------------------|----------|
| Trp5TS2 | E=-686.076624365 | H0=-685.862704 | H298=-685.848835 | G298=-685.902946 |          |
| H       | 2.73948          | 2.34402        | -1.34593         | 0.43195          | 0.00157  |
| H       | 3.66204          | 2.45220        | 0.04443          | 0.43162          | -0.00039 |
| H       | 1.73434          | 1.07719        | 1.05439          | 0.38631          | 0.01631  |
| H       | 4.62488          | 0.26596        | -0.64675         | 0.55280          | -0.00098 |
| H       | 0.62089          | 2.01444        | -0.10781         | 0.27790          | -0.00819 |
| H       | 0.77830          | -2.00054       | -0.57033         | 0.25238          | -0.00450 |
| H       | -1.55660         | -2.82676       | -0.65913         | 0.45932          | -0.00253 |
| H       | -4.19514         | -1.85698       | -0.33945         | 0.25604          | -0.00060 |
| H       | -5.42856         | 0.24662        | 0.16022          | 0.25740          | 0.00008  |
| H       | -4.21444         | 2.35955        | 0.57143          | 0.25555          | -0.00039 |
| H       | -1.74668         | 2.44856        | 0.50299          | 0.24167          | -0.00019 |
| H       | 3.28074          | -2.04185       | 1.16258          | 0.54777          | -0.00113 |
| C       | 2.38862          | 0.81133        | -0.01581         | -0.11882         | 0.02752  |
| C       | 0.90809          | 0.96803        | -0.04795         | -0.27962         | 0.25051  |
| C       | 3.11747          | -0.38088       | 0.25763          | 0.70207          | 0.29020  |
| C       | -0.13314         | 0.01180        | -0.11140         | -0.12110         | 0.00659  |
| C       | -1.55204         | 0.33620        | 0.02134          | -0.08886         | 0.01396  |
| C       | -0.07554         | -1.36505       | -0.39859         | 0.04471          | 0.15303  |
| C       | -2.27008         | -0.85867       | -0.20462         | 0.13541          | -0.01355 |
| C       | -3.66259         | -0.92791       | -0.16241         | -0.23786         | 0.01890  |
| C       | -4.34447         | 0.25480        | 0.11809          | -0.21032         | -0.00318 |
| C       | -3.65202         | 1.45822        | 0.35102          | -0.22259         | 0.01260  |
| C       | -2.25998         | 1.51129        | 0.30862          | -0.20788         | 0.00792  |
| N       | 3.19574          | 1.82477        | -0.60363         | -0.89730         | 0.02098  |
| N       | -1.33188         | -1.86284       | -0.45392         | -0.50243         | 0.08605  |
| O       | 2.59634          | -1.38296       | 0.95126          | -0.67426         | 0.05358  |
| O       | 4.38715          | -0.50840       | -0.09118         | -0.67107         | 0.07583  |

27

|         |                  |                |                  |                  |          |
|---------|------------------|----------------|------------------|------------------|----------|
| Trp5TS3 | E=-686.125069510 | H0=-685.909604 | H298=-685.896204 | G298=-685.950130 |          |
| H       | 2.73416          | -1.40561       | -2.04602         | 0.44853          | 0.00043  |
| H       | 3.86764          | -0.20541       | -2.14903         | 0.44478          | 0.00032  |
| H       | 2.33881          | 1.16933        | -1.04743         | 0.28024          | 0.01084  |
| H       | 3.96921          | -1.15935       | -0.29147         | 0.52032          | -0.00086 |
| H       | 1.02427          | -1.53669       | -0.28375         | 0.24515          | -0.01317 |
| H       | 0.38408          | 2.45212        | -0.63683         | 0.24015          | -0.00866 |
| H       | -2.04271         | 2.88720        | -0.35187         | 0.45791          | -0.00371 |
| H       | -4.44002         | 1.46544        | 0.12097          | 0.25462          | -0.00076 |
| H       | -5.26759         | -0.85130       | 0.49373          | 0.25584          | 0.00020  |
| H       | -3.71017         | -2.77053       | 0.49187          | 0.25411          | -0.00063 |
| H       | -1.28642         | -2.44360       | 0.11705          | 0.24237          | 0.00001  |
| H       | 3.25588          | 0.68100        | 2.45752          | 0.55294          | 0.00059  |
| C       | 2.39362          | 0.14119        | -0.67827         | -0.17999         | -0.02217 |
| C       | 1.04009          | -0.46508       | -0.46580         | -0.25196         | 0.46590  |
| C       | 3.10669          | 0.08467        | 0.66661          | 0.83219          | 0.08497  |
| C       | -0.14329         | 0.26456        | -0.34586         | -0.11925         | -0.03145 |
| C       | -1.47555         | -0.28956       | -0.09110         | -0.09494         | 0.03232  |
| C       | -0.33485         | 1.66381        | -0.46703         | 0.01805          | 0.28447  |
| C       | -2.38563         | 0.78999        | -0.08563         | 0.14565          | -0.01921 |
| C       | -3.75478         | 0.62364        | 0.12134          | -0.24254         | 0.02328  |
| C       | -4.20917         | -0.67827       | 0.32866          | -0.20736         | -0.00732 |
| C       | -3.32198         | -1.77078       | 0.32722          | -0.23498         | 0.02008  |
| C       | -1.95587         | -1.58844       | 0.11706          | -0.18585         | 0.00162  |
| N       | 3.27451          | -0.73040       | -1.50817         | -0.89219         | 0.01773  |
| N       | -1.65290         | 1.95598        | -0.31552         | -0.52219         | 0.12080  |
| O       | 2.77909          | 0.88960        | 1.63161          | -0.63047         | 0.01697  |
| O       | 3.97916          | -0.82911       | 0.78437          | -0.63112         | 0.02738  |

18

|    |          |                  |                |                  |                  |
|----|----------|------------------|----------------|------------------|------------------|
| R+ | (Trp)    | E=-402.293916182 | H0=-402.146316 | H298=-402.138108 | G298=-402.178018 |
| H  | -3.07236 | 2.24813          | 0.00000        | 0.24791          |                  |
| H  | -1.39976 | 3.04282          | 0.00000        | 0.25133          |                  |
| H  | -3.24713 | -0.46450         | 0.00000        | 0.27512          |                  |
| H  | -1.61997 | -2.31896         | 0.00000        | 0.47891          |                  |
| H  | 1.16264  | -2.75352         | 0.00000        | 0.26746          |                  |
| H  | 3.32004  | -1.50028         | 0.00000        | 0.26888          |                  |
| H  | 3.34848  | 0.96688          | 0.00000        | 0.26786          |                  |
| H  | 1.24316  | 2.27567          | 0.00000        | 0.26151          |                  |
| C  | -1.99256 | 2.13329          | 0.00000        | -0.16620         |                  |
| C  | -1.41467 | 0.90921          | 0.00000        | -0.14873         |                  |

Electronic Supplementary Material  
 This journal is (c) The Owner Societies 2008

|   |          |          |         |          |
|---|----------|----------|---------|----------|
| C | 0.0000   | 0.49946  | 0.00000 | -0.08885 |
| C | 0.01648  | -0.90768 | 0.00000 | 0.12488  |
| C | 1.17754  | -1.66848 | 0.00000 | -0.21735 |
| C | 2.38192  | -0.95577 | 0.00000 | -0.19206 |
| C | 2.39641  | 0.44685  | 0.00000 | -0.19967 |
| C | 1.20978  | 1.19103  | 0.00000 | -0.16196 |
| N | -1.33573 | -1.34321 | 0.00000 | -0.45220 |

18

| Rdot | (Trp)    | E=-402.516888425 | H0=-402.373170 | H298=-402.364446 | G298=-402.405721 |
|------|----------|------------------|----------------|------------------|------------------|
| H    | -2.84098 | 2.58008          | 0.00000        | 0.20825          | -0.01863         |
| H    | -1.07004 | 3.13138          | 0.00000        | 0.20823          | -0.01904         |
| H    | -3.26798 | -0.23178         | 0.00000        | 0.23282          | -0.01128         |
| H    | -1.75561 | -2.24235         | 0.00000        | 0.43945          | -0.00287         |
| H    | 1.01203  | -2.82821         | 0.00000        | 0.23753          | -0.00069         |
| H    | 3.22471  | -1.69282         | 0.00000        | 0.23772          | 0.00065          |
| H    | 3.38223  | 0.77862          | 0.00000        | 0.23775          | -0.00093         |
| H    | 1.33437  | 2.17962          | 0.00000        | 0.23915          | 0.00085          |
| C    | -1.78827 | 2.32010          | 0.00000        | -0.40072         | 0.68607          |
| C    | -1.37349 | 0.98448          | 0.00000        | -0.15927         | -0.12910         |
| C    | 0.00000  | 0.47436          | 0.00000        | -0.09081         | 0.06229          |
| C    | -2.18986 | -0.16228         | 0.00000        | -0.01660         | 0.36782          |
| C    | -0.06554 | -0.94118         | 0.00000        | 0.14728          | -0.02084         |
| C    | 1.07914  | -1.74385         | 0.00000        | -0.26506         | 0.01980          |
| C    | 2.31517  | -1.09936         | 0.00000        | -0.23420         | -0.02174         |
| C    | 2.40439  | 0.30656          | 0.00000        | -0.26465         | 0.03037          |
| C    | 1.25519  | 1.09622          | 0.00000        | -0.19185         | -0.02737         |
| N    | -1.40559 | -1.29783         | 0.00000        | -0.56503         | 0.08464          |

19

| Rdot+ | (Trp)    | E=-402.899644297 | H0=-402.742472 | H298=-402.733282 | G298=-402.777909 |
|-------|----------|------------------|----------------|------------------|------------------|
| H     | -3.21086 | -0.46642         | 0.00000        | 0.27237          | -0.00567         |
| H     | -1.62326 | -2.38296         | 0.00000        | 0.47458          | -0.00424         |
| H     | 1.19967  | -2.80363         | 0.00000        | 0.27105          | -0.00185         |
| H     | 3.34237  | -1.52934         | 0.00000        | 0.27021          | -0.00466         |
| H     | 3.36671  | 0.93909          | 0.00000        | 0.27278          | 0.00152          |
| H     | 1.23715  | 2.22679          | 0.00000        | 0.26485          | -0.00641         |
| C     | -1.36377 | 0.84876          | 0.00000        | 0.08298          | 0.32370          |
| C     | 0.00000  | 0.43480          | 0.00000        | -0.13273         | -0.06373         |
| C     | -2.13402 | -0.35760         | 0.00000        | 0.09504          | 0.18181          |
| C     | 0.02382  | -0.98582         | 0.00000        | 0.13985          | 0.02067          |
| C     | 1.19041  | -1.71841         | 0.00000        | -0.18742         | 0.06544          |
| C     | 2.40411  | -0.98429         | 0.00000        | -0.13961         | 0.15763          |
| C     | 2.41804  | 0.41380          | 0.00000        | -0.23730         | -0.05984         |
| C     | 1.22233  | 1.14154          | 0.00000        | -0.09475         | 0.22151          |
| N     | -1.31833 | -1.41628         | 0.00000        | -0.47177         | 0.14404          |
| C     | -1.91646 | 2.22899          | 0.00000        | -0.69888         | -0.00918         |
| H     | -1.57115 | 2.78490          | 0.88047        | 0.27753          | 0.01953          |
| H     | -1.57115 | 2.78490          | -0.88047       | 0.27753          | 0.01953          |
| H     | -3.00792 | 2.23002          | 0.00000        | 0.26458          | 0.00022          |

Optimized geometries for the energy profile of [Phe - NH<sub>3</sub>]<sup>+</sup> as shown in Figure 7

19

| (I) | E=-497.876922919 | H0=-497.730298 | H298=-497.720004 | G298=-497.766255 |          |
|-----|------------------|----------------|------------------|------------------|----------|
| H   | 0.96952          | -0.38984       | 2.13349          | 0.29649          | -0.00044 |
| H   | -1.21646         | -2.31904       | -0.34764         | 0.27043          | 0.00004  |
| H   | -3.42077         | -1.35287       | -0.94354         | 0.28368          | -0.00002 |
| H   | -3.82074         | 1.07776        | -0.64143         | 0.27797          | 0.00009  |
| H   | -2.05457         | 2.57066        | 0.25349          | 0.28483          | -0.00001 |
| H   | 0.16553          | 1.63988        | 0.84763          | 0.28701          | -0.00069 |
| H   | 1.16642          | -1.77818       | -0.65405         | 0.31037          | 0.00126  |
| H   | 0.32281          | -2.06264       | 1.70902          | 0.29212          | 0.00042  |
| C   | -1.40578         | -1.25636       | -0.22240         | -0.06641         | -0.00127 |
| C   | -2.63131         | -0.72006       | -0.55300         | -0.24131         | 0.00057  |
| C   | -2.85231         | 0.66060        | -0.37905         | -0.04930         | -0.00074 |
| C   | -1.85378         | 1.51244        | 0.12658          | -0.24137         | 0.00049  |
| C   | -0.61787         | 0.99577        | 0.46004          | -0.06157         | 0.00125  |
| C   | -0.36414         | -0.41120       | 0.29969          | -0.13775         | -0.00025 |
| C   | 0.64506          | -1.08571       | 1.36606          | -0.30906         | 0.00262  |
| C   | 1.14601          | -0.92589       | 0.01983          | -0.26325         | -0.00365 |
| C   | 2.17381          | 0.12339        | -0.29291         | 0.75198          | -0.06034 |
| O   | 2.87245          | 0.05234        | -1.34655         | -0.27229         | 0.64101  |
| O   | 2.43381          | 1.10470        | 0.43331          | -0.41254         | 0.41967  |

19

| (ITSII) | E=-497.866297536 | H0=-497.721978 | H298=-497.711552 | G298=-497.758047 |
|---------|------------------|----------------|------------------|------------------|
|---------|------------------|----------------|------------------|------------------|

Electronic Supplementary Material for PCCP  
This journal is (c) The Owner Societies 2008

|   |          |          |          |          |          |
|---|----------|----------|----------|----------|----------|
| H | 0.5567   | -0.06301 | 2.10659  | 0.30379  | 0.00963  |
| H | 0.5567   | -2.34714 | -0.16721 | 0.27049  | -0.00035 |
| H | -3.44377 | -1.48661 | -0.73583 | 0.28304  | 0.00012  |
| H | -3.89093 | 0.95407  | -0.64340 | 0.27728  | -0.00116 |
| H | -2.12147 | 2.55773  | 0.02605  | 0.28425  | 0.00072  |
| H | 0.14973  | 1.73039  | 0.58789  | 0.29075  | -0.00119 |
| H | 1.21922  | -1.82519 | -0.47535 | 0.30891  | -0.00505 |
| H | 0.36463  | -1.81162 | 1.95575  | 0.29377  | 0.01329  |
| C | -1.39949 | -1.28140 | -0.13173 | -0.08090 | 0.00712  |
| C | -2.65212 | -0.80302 | -0.44875 | -0.23439 | 0.00526  |
| C | -2.90078 | 0.58370  | -0.39252 | -0.05327 | 0.04019  |
| C | -1.90126 | 1.49652  | -0.01550 | -0.24356 | -0.01458 |
| C | -0.63645 | 1.04088  | 0.30142  | -0.06037 | 0.03887  |
| C | -0.35030 | -0.37005 | 0.24684  | -0.14972 | 0.00096  |
| C | 0.68176  | -0.89474 | 1.46504  | -0.28912 | -0.01548 |
| C | 1.10557  | -0.91828 | 0.10552  | -0.16078 | 0.43540  |
| C | 2.38459  | 0.28355  | -0.35360 | 0.84969  | -0.06818 |
| O | 2.87741  | -0.29376 | -1.30514 | -0.37868 | 0.40500  |
| O | 2.36858  | 1.22731  | 0.39080  | -0.51118 | 0.14942  |

16

| (II) | E=-309.308443022 | H0=-309.177230 | H298=-309.169473 | G298=-309.208495 |          |
|------|------------------|----------------|------------------|------------------|----------|
| H    | -2.24005         | -1.05532       | 1.18618          | 0.29252          | 0.02972  |
| H    | -0.52689         | 2.16208        | -0.01815         | 0.27009          | -0.00077 |
| H    | 1.95453          | 2.17908        | 0.11382          | 0.28000          | 0.00032  |
| H    | 3.20113          | 0.03567        | 0.11986          | 0.27513          | -0.00129 |
| H    | 2.01608          | -2.13998       | -0.00318         | 0.28068          | 0.00116  |
| H    | -0.46367         | -2.18705       | -0.16491         | 0.27323          | -0.00201 |
| H    | -2.44104         | 0.71753        | -1.44197         | 0.26447          | -0.01102 |
| H    | -2.43084         | 0.77438        | 1.28902          | 0.28698          | 0.04053  |
| C    | 0.03386          | 1.23182        | -0.02089         | -0.09204         | 0.02234  |
| C    | 1.41510          | 1.24019        | 0.05126          | -0.23409         | 0.00526  |
| C    | 2.11681          | 0.02206        | 0.05596          | -0.07375         | 0.04283  |
| C    | 1.44931          | -1.21528       | -0.01314         | -0.23964         | -0.01406 |
| C    | 0.07177          | -1.24471       | -0.09674         | -0.07575         | 0.05469  |
| C    | -0.66816         | -0.01326       | -0.11770         | -0.18423         | -0.02165 |
| C    | -2.17593         | -0.09463       | 0.67917          | -0.32848         | -0.05391 |
| C    | -2.08763         | -0.00726       | -0.71804         | 0.00489          | 0.90785  |

16

| (IITSIII) | E=-309.307684872 | H0=-309.177176 | H298=-309.169819 | G298=-309.208133 |          |
|-----------|------------------|----------------|------------------|------------------|----------|
| H         | -2.13521         | -1.14284       | 1.15074          | 0.28387          | 0.02591  |
| H         | -0.48416         | 2.18128        | -0.05841         | 0.26946          | -0.00225 |
| H         | 1.98439          | 2.16137        | 0.19138          | 0.27856          | 0.00099  |
| H         | 3.20773          | 0.00157        | 0.22280          | 0.27367          | -0.00373 |
| H         | 1.99515          | -2.15424       | 0.00149          | 0.27933          | 0.00206  |
| H         | -0.46893         | -2.16599       | -0.27638         | 0.27155          | -0.00361 |
| H         | -2.49228         | 0.85799        | -1.27950         | 0.26645          | -0.01253 |
| H         | -2.59258         | 0.63323        | 1.37005          | 0.28214          | 0.03908  |
| C         | 0.06214          | 1.24299        | -0.05006         | -0.13204         | 0.07433  |
| C         | 1.43937          | 1.22938        | 0.08619          | -0.22223         | -0.02179 |
| C         | 2.12826          | 0.00422        | 0.10491          | -0.09070         | 0.12651  |
| C         | 1.44429          | -1.21999       | -0.01675         | -0.23105         | -0.04425 |
| C         | 0.07161          | -1.23102       | -0.16394         | -0.11757         | 0.10623  |
| C         | -0.64789         | 0.01093        | -0.21364         | -0.13183         | -0.00817 |
| C         | -2.25054         | -0.16038       | 0.70020          | -0.23525         | -0.08741 |
| C         | -2.08292         | 0.06181        | -0.66729         | -0.04437         | 0.80861  |

16

| (III) | E=-309.376457797 | H0=-309.243642 | H298=-309.235785 | G298=-309.275287 |          |
|-------|------------------|----------------|------------------|------------------|----------|
| H     | -2.44348         | 1.98546        | 0.00000          | 0.22769          | -0.01240 |
| H     | 2.15363          | 0.90380        | 0.00000          | 0.26872          | -0.00276 |
| H     | 2.73128          | -1.50887       | 0.00000          | 0.27935          | 0.00045  |
| H     | 0.91480          | -3.21057       | 0.00000          | 0.27162          | -0.00791 |
| H     | -1.47533         | -2.52552       | 0.00000          | 0.27870          | 0.00085  |
| H     | -2.07531         | -0.13795       | 0.00000          | 0.25998          | -0.00328 |
| H     | 0.59187          | 2.63125        | 0.00000          | 0.26802          | 0.00018  |
| H     | -1.61547         | 3.63753        | 0.00000          | 0.25148          | -0.01272 |
| C     | 1.37287          | 0.14936        | 0.00000          | -0.13711         | 0.08507  |
| C     | 1.69447          | -1.19014       | 0.00000          | -0.21708         | -0.02490 |
| C     | 0.66062          | -2.15458       | 0.00000          | -0.04845         | 0.27815  |
| C     | -0.69989         | -1.76707       | 0.00000          | -0.22412         | -0.03942 |
| C     | -1.03197         | -0.43126       | 0.00000          | -0.13819         | 0.10355  |
| C     | 0.00000          | 0.57108        | 0.00000          | -0.00005         | 0.18377  |
| C     | -1.52075         | 2.55631        | 0.00000          | -0.16213         | 0.45537  |
| C     | -0.27235         | 1.97045        | 0.00000          | -0.17844         | -0.00399 |

Optimized geometries for  $[Cu^I(L)]^+$ ,  $[Cu^I(L)]^+$ ,  $[Cu^II(L(solvent))]^{2+}$  as shown in Table 1

This journal is (c) The Owner Societies 2008

| $[Cu^II(tpy)]^{2+}$ | E=-2382.362199500 | H0=-2382.131300 | H298=-2382.116340 | G298=-2382.173017 |
|---------------------|-------------------|-----------------|-------------------|-------------------|
| Cu                  | 0.00000           | -1.15762        | 0.00000           |                   |
| N                   | -1.94301          | -0.93841        | 0.00000           |                   |
| N                   | 0.00000           | 0.74206         | 0.00000           |                   |
| N                   | 1.94301           | -0.93841        | 0.00000           |                   |
| C                   | -2.87858          | -1.90486        | 0.00000           |                   |
| C                   | -4.24217          | -1.61028        | 0.00000           |                   |
| C                   | -4.63959          | -0.27519        | 0.00000           |                   |
| C                   | -3.66729          | 0.73264         | 0.00000           |                   |
| C                   | -2.32282          | 0.38243         | 0.00000           |                   |
| C                   | -1.19696          | 1.34814         | 0.00000           |                   |
| C                   | -1.22314          | 2.74519         | 0.00000           |                   |
| C                   | 0.00000           | 3.42886         | 0.00000           |                   |
| C                   | 1.22314           | 2.74519         | 0.00000           |                   |
| C                   | 1.19696           | 1.34814         | 0.00000           |                   |
| C                   | 2.32282           | 0.38243         | 0.00000           |                   |
| C                   | 3.66729           | 0.73264         | 0.00000           |                   |
| C                   | 4.63959           | -0.27519        | 0.00000           |                   |
| C                   | 4.24217           | -1.61028        | 0.00000           |                   |
| C                   | 2.87858           | -1.90486        | 0.00000           |                   |
| H                   | -2.52764          | -2.93216        | 0.00000           |                   |
| H                   | -4.96453          | -2.41903        | 0.00000           |                   |
| H                   | -5.69293          | -0.01340        | 0.00000           |                   |
| H                   | -3.96286          | 1.77580         | 0.00001           |                   |
| H                   | -2.15798          | 3.29382         | 0.00000           |                   |
| H                   | 0.00000           | 4.51438         | 0.00000           |                   |
| H                   | 2.15798           | 3.29382         | 0.00000           |                   |
| H                   | 3.96286           | 1.77580         | 0.00000           |                   |
| H                   | 5.69293           | -0.01340        | 0.00000           |                   |
| H                   | 4.96453           | -2.41903        | 0.00000           |                   |
| H                   | 2.52764           | -2.93216        | 0.00000           |                   |

30

| $[Cu^I(tpy)]^+$ | E=-2382.735769430 | H0=-2382.506324 | H298=-2382.490722 | G298=-2382.549364 |
|-----------------|-------------------|-----------------|-------------------|-------------------|
| Cu              | 0.00000           | -1.31556        | -0.04594          |                   |
| N               | -2.00984          | -0.94829        | -0.04536          |                   |
| N               | 0.00000           | 0.72602         | 0.10398           |                   |
| N               | 2.00984           | -0.94830        | -0.04543          |                   |
| C               | -3.00469          | -1.85052        | -0.05302          |                   |
| C               | -4.35253          | -1.49790        | 0.01782           |                   |
| C               | -4.68206          | -0.14776        | 0.10103           |                   |
| C               | -3.65644          | 0.79912         | 0.10932           |                   |
| C               | -2.32844          | 0.37932         | 0.03545           |                   |
| C               | -1.17724          | 1.33743         | 0.03016           |                   |
| C               | -1.22031          | 2.73385         | -0.07580          |                   |
| C               | 0.00000           | 3.41897         | -0.11656          |                   |
| C               | 1.22031           | 2.73384         | -0.07584          |                   |
| C               | 1.17724           | 1.33743         | 0.03011           |                   |
| C               | 2.32844           | 0.37932         | 0.03536           |                   |
| C               | 3.65645           | 0.79912         | 0.10916           |                   |
| C               | 4.68206           | -0.14776        | 0.10083           |                   |
| C               | 4.35253           | -1.49790        | 0.01764           |                   |
| C               | 3.00469           | -1.85052        | -0.05314          |                   |
| H               | -2.70737          | -2.89135        | -0.12301          |                   |
| H               | -5.11391          | -2.26965        | 0.00625           |                   |
| H               | -5.71842          | 0.16841         | 0.16072           |                   |
| H               | -3.89101          | 1.85488         | 0.18137           |                   |
| H               | -2.15323          | 3.28170         | -0.14177          |                   |
| H               | 0.00000           | 4.50092         | -0.20144          |                   |
| H               | 2.15323           | 3.28169         | -0.14185          |                   |
| H               | 3.89102           | 1.85488         | 0.18120           |                   |
| H               | 5.71843           | 0.16841         | 0.16047           |                   |
| H               | 5.11391           | -2.26965        | 0.00604           |                   |
| H               | 2.70737           | -2.89135        | -0.12311          |                   |

33

| $[Cu^II(tpy)(H_2O)]^{2+}$ | E=-2458.845874050 | H0=-2458.590271 | H298=-2458.572132 | G298=-2458.635590 |
|---------------------------|-------------------|-----------------|-------------------|-------------------|
| O                         | -0.00057          | -3.08650        | 0.00024           |                   |
| H                         | 0.00090           | -3.65608        | 0.78528           |                   |
| H                         | 0.00114           | -3.65636        | -0.78461          |                   |
| Cu                        | 0.00001           | -1.02682        | 0.00005           |                   |
| N                         | -1.99659          | -0.72299        | -0.00002          |                   |
| N                         | 0.00008           | 0.90151         | 0.00002           |                   |
| N                         | 1.99651           | -0.72302        | -0.00002          |                   |

|                                         |          |          |          |          |
|-----------------------------------------|----------|----------|----------|----------|
| Electronic Supplementary Material       | 1608     | CCP      | -1.65660 | -0.00010 |
| This journal is (c) The Owner Societies | 2008     |          | -1.32580 | -0.00015 |
| C                                       | -4.67579 | 0.02049  | -0.00010 |          |
| C                                       | -3.67327 | 0.99555  | -0.00002 |          |
| C                                       | -2.33890 | 0.60017  | 0.00001  |          |
| C                                       | -1.18745 | 1.53182  | 0.00003  |          |
| C                                       | -1.21657 | 2.92824  | 0.00006  |          |
| C                                       | 0.00012  | 3.61796  | 0.00006  |          |
| C                                       | 1.21679  | 2.92820  | 0.00004  |          |
| C                                       | 1.18759  | 1.53179  | 0.00002  |          |
| C                                       | 2.33893  | 0.60010  | -0.00001 |          |
| C                                       | 3.67332  | 0.99540  | -0.00004 |          |
| C                                       | 4.67577  | 0.02030  | -0.00010 |          |
| C                                       | 4.31671  | -1.32597 | -0.00013 |          |
| C                                       | 2.96187  | -1.65666 | -0.00009 |          |
| H                                       | -2.63652 | -2.69058 | -0.00013 |          |
| H                                       | -5.06313 | -2.11236 | -0.00021 |          |
| H                                       | -5.72062 | 0.31401  | -0.00012 |          |
| H                                       | -3.93650 | 2.04698  | 0.00000  |          |
| H                                       | -2.15339 | 3.47264  | 0.00007  |          |
| H                                       | 0.00013  | 4.70329  | 0.00009  |          |
| H                                       | 2.15363  | 3.47256  | 0.00005  |          |
| H                                       | 3.93663  | 2.04680  | -0.00002 |          |
| H                                       | 5.72061  | 0.31376  | -0.00012 |          |
| H                                       | 5.06298  | -2.11257 | -0.00018 |          |
| H                                       | 2.63641  | -2.69064 | -0.00009 |          |

36

|                                                            |                   |                 |                   |                   |
|------------------------------------------------------------|-------------------|-----------------|-------------------|-------------------|
| [Cu <sup>II</sup> (tpy)(CH <sub>3</sub> OH)] <sup>2+</sup> | E=-2498.152449360 | H0=-2497.867941 | H298=-2497.848305 | G298=-2497.916358 |
| C                                                          | 0.00570           | -3.80898        | 0.91638           |                   |
| O                                                          | 0.05928           | -2.86330        | -0.20696          |                   |
| H                                                          | 0.67782           | -4.64312        | 0.71015           |                   |
| H                                                          | 0.34444           | -3.26640        | 1.79789           |                   |
| H                                                          | -1.01705          | -4.16229        | 1.05845           |                   |
| H                                                          | -0.10638          | -3.32213        | -1.04419          |                   |
| Cu                                                         | 0.00071           | -0.84071        | -0.11068          |                   |
| N                                                          | 2.00111           | -0.52180        | -0.10240          |                   |
| N                                                          | -0.00334          | 1.08778         | 0.01309           |                   |
| N                                                          | -2.00249          | -0.53225        | -0.10417          |                   |
| C                                                          | 2.96829           | -1.44906        | -0.18409          |                   |
| C                                                          | 4.32203           | -1.11294        | -0.17774          |                   |
| C                                                          | 4.67630           | 0.23128         | -0.08262          |                   |
| C                                                          | 3.67069           | 1.19956         | 0.00105           |                   |
| C                                                          | 2.33785           | 0.79853         | -0.01221          |                   |
| C                                                          | 1.18162           | 1.72155         | 0.06042           |                   |
| C                                                          | 1.20768           | 3.11427         | 0.16473           |                   |
| C                                                          | -0.00998          | 3.79969         | 0.21515           |                   |
| C                                                          | -1.22447          | 3.10843         | 0.16129           |                   |
| C                                                          | -1.19118          | 1.71605         | 0.05734           |                   |
| C                                                          | -2.34321          | 0.78754         | -0.01599          |                   |
| C                                                          | -3.67734          | 1.18526         | -0.00210          |                   |
| C                                                          | -4.68127          | 0.21554         | -0.08217          |                   |
| C                                                          | -4.32421          | -1.12840        | -0.17343          |                   |
| C                                                          | -2.97000          | -1.46012        | -0.18057          |                   |
| H                                                          | 2.64210           | -2.48006        | -0.25829          |                   |
| H                                                          | 5.07141           | -1.89354        | -0.24669          |                   |
| H                                                          | 5.72000           | 0.52860         | -0.07461          |                   |
| H                                                          | 3.93029           | 2.24940         | 0.07307           |                   |
| H                                                          | 2.14344           | 3.65880         | 0.20668           |                   |
| H                                                          | -0.01271          | 4.88192         | 0.29681           |                   |
| H                                                          | -2.16269          | 3.64886         | 0.20061           |                   |
| H                                                          | -3.93885          | 2.23469         | 0.06842           |                   |
| H                                                          | -5.72557          | 0.51075         | -0.07354          |                   |
| H                                                          | -5.07172          | -1.91113        | -0.23828          |                   |
| H                                                          | -2.64741          | -2.49272        | -0.24909          |                   |

30

|                                            |                   |                 |                   |                   |
|--------------------------------------------|-------------------|-----------------|-------------------|-------------------|
| [Cu <sup>II</sup> (4Cl-tpy)] <sup>2+</sup> | E=-2841.948733120 | H0=-2841.727777 | H298=-2841.711515 | G298=-2841.771577 |
| Cu                                         | 0.00000           | -1.65642        | 0.00014           |                   |
| N                                          | 1.94453           | -1.43374        | 0.00004           |                   |
| N                                          | 0.00000           | 0.23838         | -0.00002          |                   |
| N                                          | -1.94453          | -1.43374        | 0.00020           |                   |
| C                                          | 2.88110           | -2.39920        | 0.00009           |                   |
| C                                          | 4.24447           | -2.10336        | 0.00001           |                   |
| C                                          | 4.64089           | -0.76804        | -0.00011          |                   |
| C                                          | 3.66765           | 0.23890         | -0.00016          |                   |



|                                              |          |          |          |          |
|----------------------------------------------|----------|----------|----------|----------|
| Electronic Supplementary Material            | 2.12675  | PCCP     | -0.11271 | -0.00008 |
| This journal is (c) The Owner Societies 2008 | 0.85077  |          | 0.85077  | -0.00012 |
| C                                            | 1.22809  | 2.24259  | 2.24259  | -0.00025 |
| C                                            | 0.00000  | 2.93214  | 2.93214  | -0.00026 |
| C                                            | -1.22809 | 2.24259  | 2.24259  | -0.00015 |
| C                                            | -1.19498 | 0.85077  | 0.85077  | -0.00003 |
| C                                            | -2.32375 | -0.11271 | -0.11271 | 0.00010  |
| C                                            | -3.66765 | 0.23890  | 0.23890  | 0.00013  |
| C                                            | -4.64089 | -0.76804 | -0.76804 | 0.00026  |
| C                                            | -4.24447 | -2.10336 | -2.10336 | 0.00036  |
| C                                            | -2.88110 | -2.39920 | -2.39920 | 0.00032  |
| H                                            | 2.53122  | -3.42685 | -3.42685 | 0.00018  |
| H                                            | 4.96750  | -2.91153 | -2.91153 | 0.00006  |
| H                                            | 5.69400  | -0.50527 | -0.50527 | -0.00017 |
| H                                            | 3.96275  | 1.28222  | 1.28222  | -0.00025 |
| H                                            | 2.15970  | 2.79590  | 2.79590  | -0.00033 |
| Cl                                           | 0.00000  | 4.64652  | 4.64652  | -0.00041 |
| H                                            | -2.15970 | 2.79590  | 2.79590  | -0.00016 |
| H                                            | -3.96275 | 1.28222  | 1.28222  | 0.00006  |
| H                                            | -5.69400 | -0.50527 | -0.50527 | 0.00029  |
| H                                            | -4.96750 | -2.91153 | -2.91153 | 0.00046  |
| H                                            | -2.53122 | -3.42685 | -3.42685 | 0.00040  |

30

|                                          |                   |                 |                   |                   |
|------------------------------------------|-------------------|-----------------|-------------------|-------------------|
| [Cu <sup>I</sup> (4Cl-tpy)] <sup>+</sup> | E=-2842.324560360 | H0=-2842.105035 | H298=-2842.089029 | G298=-2842.147921 |
| Cu                                       | 0.00000           | -1.82241        | -1.82241          | 0.00015           |
| N                                        | 2.01428           | -1.44707        | -1.44707          | 0.00004           |
| N                                        | 0.00000           | 0.22119         | 0.22119           | 0.00000           |
| N                                        | -2.01428          | -1.44707        | -1.44707          | 0.00020           |
| C                                        | 3.01131           | -2.34646        | -2.34646          | 0.00007           |
| C                                        | 4.35987           | -1.98827        | -1.98827          | 0.00000           |
| C                                        | 4.68730           | -0.63536        | -0.63536          | -0.00011          |
| C                                        | 3.65904           | 0.30899         | 0.30899           | -0.00015          |
| C                                        | 2.33129           | -0.11691        | -0.11691          | -0.00008          |
| C                                        | 1.17586           | 0.83780         | 0.83780           | -0.00011          |
| C                                        | 1.22545           | 2.23596         | 2.23596           | -0.00025          |
| C                                        | 0.00000           | 2.91681         | 2.91681           | -0.00026          |
| C                                        | -1.22545          | 2.23596         | 2.23596           | -0.00015          |
| C                                        | -1.17586          | 0.83780         | 0.83780           | -0.00002          |
| C                                        | -2.33129          | -0.11691        | -0.11691          | 0.00011           |
| C                                        | -3.65904          | 0.30899         | 0.30899           | 0.00014           |
| C                                        | -4.68730          | -0.63536        | -0.63536          | 0.00027           |
| C                                        | -4.35987          | -1.98827        | -1.98827          | 0.00036           |
| C                                        | -3.01131          | -2.34646        | -2.34646          | 0.00032           |
| H                                        | 2.71560           | -3.39008        | -3.39008          | 0.00016           |
| H                                        | 5.12314           | -2.75822        | -2.75822          | 0.00004           |
| H                                        | 5.72387           | -0.31435        | -0.31435          | -0.00017          |
| H                                        | 3.89409           | 1.36705         | 1.36705           | -0.00024          |
| H                                        | 2.15261           | 2.79557         | 2.79557           | -0.00034          |
| Cl                                       | 0.00000           | 4.65356         | 4.65356           | -0.00043          |
| H                                        | -2.15261          | 2.79557         | 2.79557           | -0.00017          |
| H                                        | -3.89409          | 1.36705         | 1.36705           | 0.00007           |
| H                                        | -5.72387          | -0.31435        | -0.31435          | 0.00029           |
| H                                        | -5.12314          | -2.75822        | -2.75822          | 0.00045           |
| H                                        | -2.71560          | -3.39008        | -3.39008          | 0.00039           |

30

|                                                               |                   |                 |                   |                   |
|---------------------------------------------------------------|-------------------|-----------------|-------------------|-------------------|
| [Cu <sup>II</sup> (4Cl-tpy)(H <sub>2</sub> O)] <sup>+2+</sup> | E=-2918.432820950 | H0=-2918.187144 | H298=-2918.167707 | G298=-2918.234520 |
| O                                                             | -0.00053          | -3.57210        | -3.57210          | 0.00011           |
| H                                                             | 0.00019           | -4.14177        | -4.14177          | -0.78490          |
| H                                                             | 0.00025           | -4.14172        | -4.14172          | 0.78516           |
| Cu                                                            | -0.00008          | -1.51501        | -1.51501          | 0.00005           |
| N                                                             | 1.99860           | -1.20751        | -1.20751          | -0.00003          |
| N                                                             | 0.00003           | 0.40873         | 0.40873           | -0.00001          |
| N                                                             | -1.99870          | -1.20729        | -1.20729          | 0.00011           |
| C                                                             | 2.96503           | -2.13993        | -2.13993          | -0.00004          |
| C                                                             | 4.31959           | -1.80765        | -1.80765          | -0.00009          |
| C                                                             | 4.67734           | -0.46110        | -0.46110          | -0.00015          |
| C                                                             | 3.67375           | 0.51293         | 0.51293           | -0.00014          |
| C                                                             | 2.34013           | 0.11577         | 0.11577           | -0.00009          |
| C                                                             | 1.18556           | 1.04467         | 1.04467           | -0.00007          |
| C                                                             | 1.22155           | 2.43648         | 2.43648           | -0.00012          |
| C                                                             | 0.00017           | 3.13014         | 3.13014           | -0.00010          |
| C                                                             | -1.22128          | 2.43661         | 2.43661           | -0.00004          |
| C                                                             | -1.18544          | 1.04480         | 1.04480           | 0.00001           |
| C                                                             | -2.34011          | 0.11602         | 0.11602           | 0.00008           |

Electronic Supplementary Material for  
 This journal is (c) The Owner Societies 2008

|    |          |          |          |
|----|----------|----------|----------|
| C  | 1.7068   | 0.51330  | 0.00012  |
| C  | 1.7068   | -0.46065 | 0.00019  |
| C  | -4.31974 | -1.80722 | 0.00022  |
| C  | -2.96521 | -2.13964 | 0.00018  |
| H  | 2.64083  | -3.17431 | 0.00000  |
| H  | 5.06672  | -2.59346 | -0.00010 |
| H  | 5.72184  | -0.16642 | -0.00019 |
| H  | 3.93645  | 1.56452  | -0.00018 |
| H  | 2.15491  | 2.98593  | -0.00018 |
| Cl | 0.00027  | 4.84686  | -0.00016 |
| H  | -2.15458 | 2.98616  | -0.00002 |
| H  | -3.93629 | 1.56492  | 0.00009  |
| H  | -5.72184 | -0.16587 | 0.00022  |
| H  | -5.06693 | -2.59297 | 0.00027  |
| H  | -2.64106 | -3.17404 | 0.00020  |

30

|                                                                |                   |                 |                   |                   |
|----------------------------------------------------------------|-------------------|-----------------|-------------------|-------------------|
| [Cu <sup>II</sup> (4Cl-tpy)(CH <sub>3</sub> OH)] <sup>2+</sup> | E=-2957.739454900 | H0=-2957.464831 | H298=-2957.443920 | G298=-2957.515232 |
| C                                                              | 1.02631           | -4.14528        | 0.97492           |                   |
| O                                                              | 0.87675           | -3.23165        | -0.16675          |                   |
| H                                                              | 1.83664           | -4.84426        | 0.76360           |                   |
| H                                                              | 1.28063           | -3.52983        | 1.83679           |                   |
| H                                                              | 0.09106           | -4.67901        | 1.15231           |                   |
| H                                                              | 0.80308           | -3.73283        | -0.99283          |                   |
| Cu                                                             | 0.32015           | -1.28761        | -0.10465          |                   |
| N                                                              | 2.18698           | -0.49303        | -0.10419          |                   |
| N                                                              | -0.14620          | 0.58156         | -0.02627          |                   |
| N                                                              | -1.70229          | -1.46546        | -0.10373          |                   |
| C                                                              | 3.34991           | -1.16076        | -0.16324          |                   |
| C                                                              | 4.58251           | -0.50746        | -0.16027          |                   |
| C                                                              | 4.60162           | 0.88411         | -0.09358          |                   |
| C                                                              | 3.39135           | 1.58259         | -0.03527          |                   |
| C                                                              | 2.19533           | 0.87101         | -0.04327          |                   |
| C                                                              | 0.84837           | 1.48730         | 0.00310           |                   |
| C                                                              | 0.54656           | 2.84539         | 0.06485           |                   |
| C                                                              | -0.80560          | 3.22205         | 0.09262           |                   |
| C                                                              | -1.82208          | 2.25377         | 0.05753           |                   |
| C                                                              | -1.44972          | 0.91365         | -0.00311          |                   |
| C                                                              | -2.34897          | -0.26362        | -0.05043          |                   |
| C                                                              | -3.73928          | -0.19498        | -0.04486          |                   |
| C                                                              | -4.48279          | -1.37793        | -0.09625          |                   |
| C                                                              | -3.81488          | -2.59971        | -0.15125          |                   |
| C                                                              | -2.42055          | -2.59879        | -0.15253          |                   |
| H                                                              | 3.28302           | -2.24129        | -0.21692          |                   |
| H                                                              | 5.49855           | -1.08546        | -0.21005          |                   |
| H                                                              | 5.54268           | 1.42463         | -0.08869          |                   |
| H                                                              | 3.38977           | 2.66537         | 0.01338           |                   |
| H                                                              | 1.31963           | 3.60337         | 0.09052           |                   |
| Cl                                                             | -1.22201          | 4.88627         | 0.16884           |                   |
| H                                                              | -2.86055          | 2.56038         | 0.07758           |                   |
| H                                                              | -4.24446          | 0.76300         | -0.00194          |                   |
| H                                                              | -5.56738          | -1.34011        | -0.09341          |                   |
| H                                                              | -4.35375          | -3.53970        | -0.19288          |                   |
| H                                                              | -1.86134          | -3.52654        | -0.19330          |                   |

Optimized geometries for the [Cu<sup>II</sup>(L)(Phe)]<sup>2+</sup> as shown in Table 1, Figure 4a and Figure 6.

53

|                                             |          |                   |                 |                   |                   |
|---------------------------------------------|----------|-------------------|-----------------|-------------------|-------------------|
| [Cu <sup>II</sup> (tpy)(Phe)] <sup>2+</sup> | (1)      | E=-2937.306962520 | H0=-2936.883468 | H298=-2936.855783 | G298=-2936.944656 |
| C                                           | -1.32869 | -0.48758          | 0.47822         |                   |                   |
| C                                           | -2.83201 | -0.80339          | 0.33598         |                   |                   |
| C                                           | -3.61935 | 0.33651           | -0.36035        |                   |                   |
| C                                           | -5.11903 | 0.15035           | -0.24984        |                   |                   |
| C                                           | -5.79310 | -0.77525          | -1.06278        |                   |                   |
| C                                           | -5.85016 | 0.87055           | 0.71097         |                   |                   |
| C                                           | -7.22778 | 0.66633           | 0.85881         |                   |                   |
| C                                           | -7.16686 | -0.97551          | -0.91673        |                   |                   |
| C                                           | -7.88546 | -0.25948          | 0.04757         |                   |                   |
| N                                           | -3.34715 | -0.99541          | 1.75061         |                   |                   |
| O                                           | -0.66233 | -0.48506          | -0.62132        |                   |                   |
| O                                           | -0.88296 | -0.23674          | 1.60768         |                   |                   |
| H                                           | -2.65366 | -0.52694          | 2.36754         |                   |                   |
| H                                           | -3.39116 | -1.97990          | 2.02462         |                   |                   |
| H                                           | -4.29303 | -0.59236          | 1.84948         |                   |                   |
| H                                           | -2.98092 | -1.74079          | -0.20322        |                   |                   |
| H                                           | -3.29089 | 0.34733           | -1.40366        |                   |                   |

| Atom | x        | y        | z |
|------|----------|----------|---|
| H    | 1.29503  | 0.08542  |   |
| H    | -1.32427 | -1.82925 |   |
| H    | -5.35658 | 1.63234  |   |
| H    | -7.78293 | 1.24126  |   |
| H    | -7.67964 | -1.68238 |   |
| H    | -8.95430 | -0.41394 |   |
| Cu   | 1.22040  | -0.08053 |   |
| N    | 1.20454  | 1.96360  |   |
| N    | 3.09188  | 0.28366  |   |
| N    | 1.95571  | -1.98832 |   |
| C    | 0.16761  | 2.74209  |   |
| C    | 0.25560  | 4.13437  |   |
| C    | 1.46332  | 4.72865  |   |
| C    | 2.54811  | 3.91776  |   |
| C    | 2.39381  | 2.53329  |   |
| C    | 3.47519  | 1.56323  |   |
| C    | 4.78959  | 1.85328  |   |
| C    | 5.66925  | 0.78830  |   |
| C    | 5.24435  | -0.53253 |   |
| C    | 3.91803  | -0.75949 |   |
| C    | 3.27089  | -2.06937 |   |
| C    | 3.92295  | -3.29895 |   |
| C    | 3.21159  | -4.46198 |   |
| C    | 1.86998  | -4.36488 |   |
| C    | 1.27613  | -3.10282 |   |
| H    | -0.74589 | 2.22709  |   |
| H    | -0.60430 | 4.72966  |   |
| H    | 1.56728  | 5.80877  |   |
| H    | 3.49713  | 4.36423  |   |
| H    | 5.12838  | 2.87476  |   |
| H    | 6.69454  | 0.98924  |   |
| H    | 5.93403  | -1.35286 |   |
| H    | 4.96963  | -3.35657 |   |
| H    | 3.70517  | -5.42759 |   |
| H    | 1.28937  | -5.24331 |   |
| H    | 0.23778  | -2.96474 |   |

53

| Atom                                        | x        | y        | z        | E               | H0           | H298         | G298         |
|---------------------------------------------|----------|----------|----------|-----------------|--------------|--------------|--------------|
| [Cu <sup>II</sup> (tpy)(Phe)] <sup>2+</sup> | (1)      |          |          | -2937.294062080 | -2936.872588 | -2936.844945 | -2936.934428 |
| C                                           | -1.42015 | -0.58575 | 0.57921  |                 |              |              |              |
| C                                           | -2.92487 | -0.85147 | 0.47705  |                 |              |              |              |
| C                                           | -3.64630 | 0.38072  | -0.14547 |                 |              |              |              |
| C                                           | -5.14706 | 0.19386  | -0.21541 |                 |              |              |              |
| C                                           | -5.71596 | -0.65014 | -1.18171 |                 |              |              |              |
| C                                           | -5.98830 | 0.84735  | 0.69685  |                 |              |              |              |
| C                                           | -7.37296 | 0.65413  | 0.65175  |                 |              |              |              |
| C                                           | -7.09748 | -0.84165 | -1.22888 |                 |              |              |              |
| C                                           | -7.92822 | -0.19301 | -0.30880 |                 |              |              |              |
| N                                           | -3.35222 | -1.14047 | 1.85685  |                 |              |              |              |
| O                                           | -0.68571 | -0.40147 | -0.41824 |                 |              |              |              |
| O                                           | -0.96031 | -0.54373 | 1.79175  |                 |              |              |              |
| H                                           | -1.82002 | -0.75927 | 2.34008  |                 |              |              |              |
| H                                           | -3.60336 | -2.11663 | 1.99222  |                 |              |              |              |
| H                                           | -4.16311 | -0.58551 | 2.12610  |                 |              |              |              |
| H                                           | -3.07147 | -1.71156 | -0.18529 |                 |              |              |              |
| H                                           | -3.22345 | 0.53886  | -1.14308 |                 |              |              |              |
| H                                           | -3.41106 | 1.26637  | 0.45838  |                 |              |              |              |
| H                                           | -5.08242 | -1.14678 | -1.91387 |                 |              |              |              |
| H                                           | -5.56858 | 1.53364  | 1.43008  |                 |              |              |              |
| H                                           | -8.01355 | 1.17232  | 1.35838  |                 |              |              |              |
| H                                           | -7.52722 | -1.48856 | -1.98725 |                 |              |              |              |
| H                                           | -9.00271 | -0.33993 | -0.34905 |                 |              |              |              |
| Cu                                          | 1.24226  | -0.05480 | -0.27423 |                 |              |              |              |
| N                                           | 1.22045  | 1.98037  | -0.31998 |                 |              |              |              |
| N                                           | 3.13291  | 0.28679  | -0.00008 |                 |              |              |              |
| N                                           | 1.93417  | -1.96972 | -0.31826 |                 |              |              |              |
| C                                           | 0.16156  | 2.76866  | -0.55556 |                 |              |              |              |
| C                                           | 0.25958  | 4.16013  | -0.56590 |                 |              |              |              |
| C                                           | 1.50021  | 4.74424  | -0.31848 |                 |              |              |              |
| C                                           | 2.60667  | 3.92409  | -0.07935 |                 |              |              |              |
| C                                           | 2.44180  | 2.54135  | -0.09106 |                 |              |              |              |
| C                                           | 3.53782  | 1.56342  | 0.11039  |                 |              |              |              |
| C                                           | 4.88201  | 1.83792  | 0.37381  |                 |              |              |              |
| C                                           | 5.76430  | 0.76238  | 0.51164  |                 |              |              |              |
| C                                           | 5.31281  | -0.55429 | 0.38149  |                 |              |              |              |

|   |          |          |          |
|---|----------|----------|----------|
|   |          | -0.76758 | 0.11728  |
| C | 3.90998  | -3.30591 | -0.05660 |
| C | 3.16135  | -4.46214 | -0.29430 |
| C | 1.79687  | -4.34928 | -0.55353 |
| C | 1.21960  | -3.07950 | -0.55435 |
| H | -0.77955 | 2.26543  | -0.74743 |
| H | -0.61979 | 4.76182  | -0.76615 |
| H | 1.61250  | 5.82359  | -0.31646 |
| H | 3.58040  | 4.36282  | 0.10480  |
| H | 5.24143  | 2.85537  | 0.47025  |
| H | 6.81272  | 0.95187  | 0.71806  |
| H | 6.00475  | -1.38163 | 0.48366  |
| H | 4.97420  | -3.37601 | 0.13592  |
| H | 3.64331  | -5.43433 | -0.28253 |
| H | 1.18456  | -5.22114 | -0.75439 |
| H | 0.16398  | -2.93795 | -0.75805 |

53

| [Cu <sup>II</sup> (tpy)(Phe)] <sup>2+</sup> | (2)      | E=-2937.291745890 | H0=-2936.868508 | H298=-2936.840991 | G298=-2936.929415 |
|---------------------------------------------|----------|-------------------|-----------------|-------------------|-------------------|
| C                                           | -0.95441 | -0.20575          | 2.30903         |                   |                   |
| C                                           | -2.00766 | -0.04408          | 1.21685         |                   |                   |
| C                                           | -3.34608 | -0.77463          | 1.48403         |                   |                   |
| C                                           | -4.34509 | -0.54044          | 0.36712         |                   |                   |
| C                                           | -5.01248 | 0.69084           | 0.25917         |                   |                   |
| C                                           | -4.61222 | -1.53945          | -0.58061        |                   |                   |
| C                                           | -5.52009 | -1.31255          | -1.62072        |                   |                   |
| C                                           | -5.91913 | 0.91899           | -0.77867        |                   |                   |
| C                                           | -6.17067 | -0.08122          | -1.72368        |                   |                   |
| N                                           | -1.38810 | -0.43961          | -0.08908        |                   |                   |
| O                                           | 0.24190  | -0.32070          | 2.06838         |                   |                   |
| O                                           | -1.46180 | -0.16146          | 3.52951         |                   |                   |
| H                                           | -0.75120 | -0.22211          | 4.19535         |                   |                   |
| H                                           | -1.95879 | -0.04042          | -0.83732        |                   |                   |
| H                                           | -1.52443 | -1.44622          | -0.19752        |                   |                   |
| H                                           | -2.20989 | 1.03271           | 1.16412         |                   |                   |
| H                                           | -3.73610 | -0.41561          | 2.44087         |                   |                   |
| H                                           | -3.15172 | -1.84764          | 1.60698         |                   |                   |
| H                                           | -4.85454 | 1.46299           | 1.00982         |                   |                   |
| H                                           | -4.14463 | -2.51767          | -0.48457        |                   |                   |
| H                                           | -5.73140 | -2.10180          | -2.33547        |                   |                   |
| H                                           | -6.44486 | 1.86700           | -0.83773        |                   |                   |
| H                                           | -6.88486 | 0.09214           | -2.52225        |                   |                   |
| Cu                                          | 0.62296  | -0.06317          | -0.21421        |                   |                   |
| N                                           | 1.38494  | -1.99900          | -0.47280        |                   |                   |
| N                                           | 2.53660  | 0.31284           | -0.23267        |                   |                   |
| N                                           | 0.58811  | 2.00872           | -0.42027        |                   |                   |
| C                                           | 0.71814  | -3.14635          | -0.66506        |                   |                   |
| C                                           | 1.34724  | -4.38869          | -0.72601        |                   |                   |
| C                                           | 2.73140  | -4.43987          | -0.57444        |                   |                   |
| C                                           | 3.43547  | -3.25012          | -0.38186        |                   |                   |
| C                                           | 2.73967  | -2.04192          | -0.34166        |                   |                   |
| C                                           | 3.39384  | -0.72097          | -0.19501        |                   |                   |
| C                                           | 4.76475  | -0.48186          | -0.06294        |                   |                   |
| C                                           | 5.20550  | 0.84043           | 0.01986         |                   |                   |
| C                                           | 4.29332  | 1.89623           | -0.04496        |                   |                   |
| C                                           | 2.93541  | 1.59528           | -0.17700        |                   |                   |
| C                                           | 1.82516  | 2.56728           | -0.30858        |                   |                   |
| C                                           | 2.00314  | 3.94967           | -0.36034        |                   |                   |
| C                                           | 0.89359  | 4.77595           | -0.54748        |                   |                   |
| C                                           | -0.36674 | 4.19660           | -0.68460        |                   |                   |
| C                                           | -0.47210 | 2.80873           | -0.61211        |                   |                   |
| H                                           | -0.35791 | -3.07956          | -0.78769        |                   |                   |
| H                                           | 0.76003  | -5.28510          | -0.89075        |                   |                   |
| H                                           | 3.25867  | -5.38756          | -0.61146        |                   |                   |
| H                                           | 4.51328  | -3.26947          | -0.27273        |                   |                   |
| H                                           | 5.47766  | -1.29656          | -0.02844        |                   |                   |
| H                                           | 6.26511  | 1.04958           | 0.12513         |                   |                   |
| H                                           | 4.64137  | 2.92083           | 0.00374         |                   |                   |
| H                                           | 2.99242  | 4.38176           | -0.26729        |                   |                   |
| H                                           | 1.01634  | 5.85313           | -0.59414        |                   |                   |
| H                                           | -1.25371 | 4.79850           | -0.84763        |                   |                   |
| H                                           | -1.43804 | 2.32707           | -0.72036        |                   |                   |

53

| [Cu <sup>II</sup> (tpy)(Phe)] <sup>2+</sup> | (2) | E=-2937.278239930 | H0=-2936.855305 | H298=-2936.827694 | G298=-2936.916249 |
|---------------------------------------------|-----|-------------------|-----------------|-------------------|-------------------|
|---------------------------------------------|-----|-------------------|-----------------|-------------------|-------------------|

|    |          |          |          |
|----|----------|----------|----------|
|    |          | -1.28632 | 2.42835  |
| C  |          | -0.84289 | 1.27493  |
| C  | -3.25730 | -1.52655 | 1.28799  |
| C  | -4.15995 | -0.96921 | 0.20438  |
| C  | -4.81907 | 0.25804  | 0.39136  |
| C  | -4.34124 | -1.65279 | -1.00866 |
| C  | -5.15529 | -1.12076 | -2.01559 |
| C  | -5.63378 | 0.78891  | -0.61194 |
| C  | -5.79879 | 0.10308  | -1.82021 |
| N  | -1.16977 | -1.01844 | -0.04247 |
| O  | -1.34382 | -1.86884 | 3.41133  |
| O  | 0.31752  | -0.88189 | 2.23432  |
| H  | 0.82793  | -1.13176 | 3.02733  |
| H  | -1.83450 | -0.72529 | -0.76747 |
| H  | -1.06759 | -2.02258 | -0.20235 |
| H  | -2.01388 | 0.23655  | 1.40863  |
| H  | -3.68996 | -1.37354 | 2.28109  |
| H  | -3.12832 | -2.60931 | 1.17288  |
| H  | -4.73212 | 0.77931  | 1.34274  |
| H  | -3.88729 | -2.63158 | -1.15244 |
| H  | -5.30294 | -1.67294 | -2.93852 |
| H  | -6.16168 | 1.72234  | -0.44123 |
| H  | -6.44477 | 0.50816  | -2.59256 |
| Cu | 0.63182  | -0.10562 | -0.21243 |
| N  | 1.88556  | -1.72691 | -0.59586 |
| N  | 2.36412  | 0.78571  | -0.17848 |
| N  | 0.01482  | 1.87520  | -0.19996 |
| C  | 1.54961  | -2.99534 | -0.87506 |
| C  | 2.49258  | -4.00435 | -1.06466 |
| C  | 3.84331  | -3.68034 | -0.95500 |
| C  | 4.20294  | -2.36064 | -0.67365 |
| C  | 3.20570  | -1.40102 | -0.50375 |
| C  | 3.47610  | 0.03324  | -0.24881 |
| C  | 4.73034  | 0.63479  | -0.11538 |
| C  | 4.78831  | 2.01618  | 0.08448  |
| C  | 3.61708  | 2.77613  | 0.13035  |
| C  | 2.39183  | 2.11987  | -0.01232 |
| C  | 1.05036  | 2.74771  | -0.04387 |
| C  | 0.83345  | 4.12273  | 0.02954  |
| C  | -0.46823 | 4.61723  | -0.07858 |
| C  | -1.51887 | 3.72148  | -0.26575 |
| C  | -1.23265 | 2.35776  | -0.31739 |
| H  | 0.49198  | -3.22042 | -0.96186 |
| H  | 2.16646  | -5.01283 | -1.29318 |
| H  | 4.60806  | -4.43788 | -1.09239 |
| H  | 5.24889  | -2.08828 | -0.59647 |
| H  | 5.64280  | 0.05328  | -0.16674 |
| H  | 5.75134  | 2.50428  | 0.19445  |
| H  | 3.66867  | 3.84912  | 0.26953  |
| H  | 1.66458  | 4.80598  | 0.15838  |
| H  | -0.65249 | 5.68542  | -0.02697 |
| H  | -2.54312 | 4.06065  | -0.37185 |
| H  | -2.03300 | 1.63956  | -0.46292 |

56

| [Cu <sup>II</sup> (tpy)(Phe)(H <sub>2</sub> O)] <sup>2+</sup> | (1+H <sub>2</sub> O) | E=-3013.762123070 | H0=-3013.313535 | H298=-3013.283599 | G298=-3013.376900 |
|---------------------------------------------------------------|----------------------|-------------------|-----------------|-------------------|-------------------|
| C                                                             | 1.44552              | -0.81928          | -0.89303        |                   |                   |
| C                                                             | 2.80937              | -1.01211          | -0.19493        |                   |                   |
| C                                                             | 3.44353              | 0.34008           | 0.21858         |                   |                   |
| C                                                             | 4.87772              | 0.18863           | 0.68298         |                   |                   |
| C                                                             | 5.17331              | -0.31658          | 1.95968         |                   |                   |
| C                                                             | 5.93838              | 0.50862           | -0.18215        |                   |                   |
| C                                                             | 7.26739              | 0.32414           | 0.21929         |                   |                   |
| C                                                             | 6.49812              | -0.49673          | 2.36063         |                   |                   |
| C                                                             | 7.54736              | -0.18133          | 1.48963         |                   |                   |
| N                                                             | 3.71866              | -1.71865          | -1.18601        |                   |                   |
| O                                                             | 0.49152              | -0.43922          | -0.17698        |                   |                   |
| O                                                             | 1.43706              | -1.03101          | -2.14720        |                   |                   |
| H                                                             | 3.30966              | -1.52974          | -2.12144        |                   |                   |
| H                                                             | 3.73478              | -2.73228          | -1.05198        |                   |                   |
| H                                                             | 4.68601              | -1.36701          | -1.10582        |                   |                   |
| H                                                             | 2.70254              | -1.65928          | 0.67742         |                   |                   |
| H                                                             | 2.80481              | 0.74947           | 1.00613         |                   |                   |
| H                                                             | 3.39272              | 1.03289           | -0.62986        |                   |                   |
| H                                                             | 4.36715              | -0.54991          | 2.65173         |                   |                   |

Electronic Supplementary Material for PCCP  
 This journal is (c) The Owner Societies 2008

|    |          |          |          |
|----|----------|----------|----------|
|    |          | 0.95113  | -1.15549 |
| H  |          | 0.59062  | -0.45348 |
| H  | 6.71384  | -0.87398 | 3.35539  |
| H  | 8.57628  | -0.31736 | 1.80672  |
| Cu | -1.59982 | 0.00092  | -0.88130 |
| N  | -1.47532 | 2.04816  | -0.87212 |
| N  | -2.64876 | 0.40067  | 0.71924  |
| N  | -2.35596 | -1.87016 | -0.47097 |
| C  | -0.86824 | 2.80961  | -1.79120 |
| C  | -0.79189 | 4.19801  | -1.66869 |
| C  | -1.36292 | 4.80318  | -0.55077 |
| C  | -1.99816 | 4.00835  | 0.40704  |
| C  | -2.04342 | 2.62815  | 0.21876  |
| C  | -2.72019 | 1.67683  | 1.13253  |
| C  | -3.41524 | 1.98624  | 2.30520  |
| C  | -4.02645 | 0.94617  | 3.00938  |
| C  | -3.95424 | -0.36839 | 2.54137  |
| C  | -3.24342 | -0.61611 | 1.36399  |
| C  | -3.07567 | -1.92236 | 0.68243  |
| C  | -3.61347 | -3.12312 | 1.14439  |
| C  | -3.41060 | -4.28961 | 0.40387  |
| C  | -2.67177 | -4.22591 | -0.77638 |
| C  | -2.15799 | -2.99223 | -1.17577 |
| H  | -0.44704 | 2.28388  | -2.64125 |
| H  | -0.29953 | 4.78164  | -2.43845 |
| H  | -1.32265 | 5.88016  | -0.42393 |
| H  | -2.45358 | 4.46385  | 1.27864  |
| H  | -3.48948 | 3.00624  | 2.66260  |
| H  | -4.57295 | 1.16267  | 3.92155  |
| H  | -4.44554 | -1.16816 | 3.08224  |
| H  | -4.18649 | -3.15448 | 2.06365  |
| H  | -3.82721 | -5.23148 | 0.74574  |
| H  | -2.49550 | -5.10733 | -1.38266 |
| H  | -1.57083 | -2.89470 | -2.08261 |
| O  | -0.90338 | -0.21999 | -2.76753 |
| H  | -1.38211 | -0.56267 | -3.53359 |
| H  | 0.03735  | -0.60473 | -2.71176 |

59

| [Cu <sup>II</sup> (tpy)(Phe)(CH <sub>3</sub> OH)] <sup>2+</sup> | (1+CH <sub>3</sub> OH) | E=-3053.064761370 | H0=-3052.587805 | H298=-3052.555908 | G298=-3052.654493 |
|-----------------------------------------------------------------|------------------------|-------------------|-----------------|-------------------|-------------------|
| C                                                               | -1.48299               | -0.83351          | 0.78428         |                   |                   |
| C                                                               | -2.86168               | -1.00079          | 0.10629         |                   |                   |
| C                                                               | -3.49992               | 0.36356           | -0.25509        |                   |                   |
| C                                                               | -4.94296               | 0.22964           | -0.69680        |                   |                   |
| C                                                               | -5.26386               | -0.24517          | -1.97903        |                   |                   |
| C                                                               | -5.98643               | 0.53534           | 0.19381         |                   |                   |
| C                                                               | -7.32332               | 0.36647           | -0.18796        |                   |                   |
| C                                                               | -6.59642               | -0.40994          | -2.36033        |                   |                   |
| C                                                               | -7.62846               | -0.10904          | -1.46400        |                   |                   |
| N                                                               | -3.75120               | -1.73530          | 1.09504         |                   |                   |
| O                                                               | -0.54804               | -0.41942          | 0.06015         |                   |                   |
| O                                                               | -1.44461               | -1.10071          | 2.02514         |                   |                   |
| H                                                               | -3.30453               | -1.59024          | 2.02226         |                   |                   |
| H                                                               | -3.78773               | -2.74193          | 0.91956         |                   |                   |
| H                                                               | -4.71509               | -1.36804          | 1.06232         |                   |                   |
| H                                                               | -2.77293               | -1.62240          | -0.78651        |                   |                   |
| H                                                               | -2.87471               | 0.79484           | -1.04181        |                   |                   |
| H                                                               | -3.43138               | 1.03129           | 0.61208         |                   |                   |
| H                                                               | -4.47125               | -0.46692          | -2.69030        |                   |                   |
| H                                                               | -5.76007               | 0.95408           | 1.17327         |                   |                   |
| H                                                               | -8.11897               | 0.62162           | 0.50497         |                   |                   |
| H                                                               | -6.83163               | -0.76376          | -3.35928        |                   |                   |
| H                                                               | -8.66353               | -0.23294          | -1.76567        |                   |                   |
| Cu                                                              | 1.55003                | -0.00336          | 0.71753         |                   |                   |
| N                                                               | 1.43479                | 2.04900           | 0.76983         |                   |                   |
| N                                                               | 2.59123                | 0.44602           | -0.88030        |                   |                   |
| N                                                               | 2.27152                | -1.86906          | 0.21673         |                   |                   |
| C                                                               | 0.82191                | 2.78328           | 1.70670         |                   |                   |
| C                                                               | 0.74488                | 4.17448           | 1.62495         |                   |                   |
| C                                                               | 1.32122                | 4.81240           | 0.52797         |                   |                   |
| C                                                               | 1.95965                | 4.04592           | -0.45031        |                   |                   |
| C                                                               | 2.00528                | 2.66059           | -0.30178        |                   |                   |
| C                                                               | 2.67717                | 1.73583           | -1.24606        |                   |                   |
| C                                                               | 3.37813                | 2.08266           | -2.40461        |                   |                   |
| C                                                               | 3.98111                | 1.06435           | -3.14648        |                   |                   |

|   |         |          |          |
|---|---------|----------|----------|
|   |         | -0.26613 | -2.72972 |
| C |         | -0.55083 | -1.56351 |
| C | 2.98959 | -1.88243 | -0.93829 |
| C | 3.50278 | -3.07119 | -1.45650 |
| C | 3.27456 | -4.26667 | -0.77200 |
| C | 2.53246 | -4.24340 | 0.40772  |
| C | 2.04507 | -3.01918 | 0.86520  |
| H | 0.39474 | 2.23165  | 2.53723  |
| H | 0.24741 | 4.73522  | 2.40834  |
| H | 1.28055 | 5.89256  | 0.43219  |
| H | 2.41620 | 4.52669  | -1.30762 |
| H | 3.46381 | 3.11474  | -2.72254 |
| H | 4.53241 | 1.30989  | -4.04836 |
| H | 4.37601 | -1.05011 | -3.29987 |
| H | 4.07510 | -3.07135 | -2.37673 |
| H | 3.67186 | -5.19994 | -1.15765 |
| H | 2.33382 | -5.14909 | 0.96972  |
| H | 1.45562 | -2.95199 | 1.77304  |
| O | 0.93985 | -0.26954 | 2.62105  |
| H | 0.01540 | -0.66417 | 2.59019  |
| C | 1.69263 | -0.62931 | 3.80018  |
| H | 2.57923 | 0.00499  | 3.83465  |
| H | 1.08276 | -0.44601 | 4.68787  |
| H | 1.99619 | -1.68016 | 3.77286  |

53

| [Cu <sup>II</sup> (4Cl-tpy)(Phe)] <sup>2+</sup> | (1)      | E=-3396.894375600 | H0=-3396.480833 | H298=-3396.451831 | G298=-3396.544162 |
|-------------------------------------------------|----------|-------------------|-----------------|-------------------|-------------------|
| C                                               | 1.79373  | 0.47366           | 0.46610         |                   |                   |
| C                                               | 3.31274  | 0.72888           | 0.38471         |                   |                   |
| C                                               | 4.07918  | -0.43320          | -0.29790        |                   |                   |
| C                                               | 5.58019  | -0.30367          | -0.13663        |                   |                   |
| C                                               | 6.31217  | 0.60629           | -0.91651        |                   |                   |
| C                                               | 6.25420  | -1.06032          | 0.83771         |                   |                   |
| C                                               | 7.63288  | -0.90702          | 1.03101         |                   |                   |
| C                                               | 7.68677  | 0.75564           | -0.72530        |                   |                   |
| C                                               | 8.34846  | 0.00368           | 0.25221         |                   |                   |
| N                                               | 3.78221  | 0.88115           | 1.81982         |                   |                   |
| O                                               | 1.16917  | 0.51633           | -0.65718        |                   |                   |
| O                                               | 1.29520  | 0.22372           | 1.57341         |                   |                   |
| H                                               | 3.05152  | 0.42820           | 2.40412         |                   |                   |
| H                                               | 3.85010  | 1.85923           | 2.11154         |                   |                   |
| H                                               | 4.70953  | 0.44380           | 1.94562         |                   |                   |
| H                                               | 3.51970  | 1.66618           | -0.13528        |                   |                   |
| H                                               | 3.78534  | -0.42132          | -1.35154        |                   |                   |
| H                                               | 3.73678  | -1.38426          | 0.12746         |                   |                   |
| H                                               | 5.81388  | 1.18300           | -1.69259        |                   |                   |
| H                                               | 5.71526  | -1.81079          | 1.41442         |                   |                   |
| H                                               | 8.14377  | -1.50962          | 1.77537         |                   |                   |
| H                                               | 8.24445  | 1.45075           | -1.34502        |                   |                   |
| H                                               | 9.41818  | 0.11845           | 0.39420         |                   |                   |
| Cu                                              | -0.73558 | 0.18683           | -0.45373        |                   |                   |
| N                                               | -0.80448 | -1.85755          | -0.57361        |                   |                   |
| N                                               | -2.62966 | -0.10552          | -0.11103        |                   |                   |
| N                                               | -1.39603 | 2.12486           | -0.44706        |                   |                   |
| C                                               | 0.20930  | -2.67430          | -0.88811        |                   |                   |
| C                                               | 0.06274  | -4.06139          | -0.92296        |                   |                   |
| C                                               | -1.18049 | -4.60929          | -0.61334        |                   |                   |
| C                                               | -2.24123 | -3.75823          | -0.29138        |                   |                   |
| C                                               | -2.02714 | -2.38184          | -0.28519        |                   |                   |
| C                                               | -3.07455 | -1.36887          | -0.00318        |                   |                   |
| C                                               | -4.40666 | -1.61607          | 0.32331         |                   |                   |
| C                                               | -5.24958 | -0.51462          | 0.52760         |                   |                   |
| C                                               | -4.76568 | 0.79458           | 0.39498         |                   |                   |
| C                                               | -3.42224 | 0.96525           | 0.06645         |                   |                   |
| C                                               | -2.71753 | 2.25384           | -0.14748        |                   |                   |
| C                                               | -3.32282 | 3.50678           | -0.08492        |                   |                   |
| C                                               | -2.55649 | 4.64517           | -0.35020        |                   |                   |
| C                                               | -1.20856 | 4.50015           | -0.67274        |                   |                   |
| C                                               | -0.66378 | 3.21593           | -0.70737        |                   |                   |
| H                                               | 1.15271  | -2.19468          | -1.12475        |                   |                   |
| H                                               | 0.90601  | -4.68831          | -1.18998        |                   |                   |
| H                                               | -1.33037 | -5.68394          | -0.62735        |                   |                   |
| H                                               | -3.21697 | -4.16850          | -0.05857        |                   |                   |
| H                                               | -4.79706 | -2.62128          | 0.42011         |                   |                   |
| Cl                                              | -6.90215 | -0.77288          | 0.93889         |                   |                   |

Electronic Supplementary Material for  
 This journal is (c) The Owner Societies 2008

|   |          |         |
|---|----------|---------|
| H | 1.63514  | 0.54674 |
| H | 3.60289  | 0.15645 |
| H | -3.01294 | 5.62888 |
| H | -0.58565 | 5.35857 |
| H | 0.37719  | 3.04123 |

53

|                                                 |          |                   |                 |                   |                   |
|-------------------------------------------------|----------|-------------------|-----------------|-------------------|-------------------|
| [Cu <sup>II</sup> (4Cl-tpy)(Phe)] <sup>2+</sup> | (2)      | E=-3396.879002880 | H0=-3396.465719 | H298=-3396.436872 | G298=-3396.529380 |
| C                                               | 1.43552  | 0.14642           | 2.31174         |                   |                   |
| C                                               | 2.46829  | -0.09201          | 1.21370         |                   |                   |
| C                                               | 3.84455  | 0.57354           | 1.46092         |                   |                   |
| C                                               | 4.81785  | 0.28835           | 0.33325         |                   |                   |
| C                                               | 5.41438  | -0.97762          | 0.21333         |                   |                   |
| C                                               | 5.13036  | 1.27531           | -0.61300        |                   |                   |
| C                                               | 6.01341  | 1.00328           | -1.66359        |                   |                   |
| C                                               | 6.29599  | -1.25099          | -0.83511        |                   |                   |
| C                                               | 6.59336  | -0.26181          | -1.77845        |                   |                   |
| N                                               | 1.86183  | 0.31093           | -0.09652        |                   |                   |
| O                                               | 0.24747  | 0.34136           | 2.08039         |                   |                   |
| O                                               | 1.94873  | 0.07552           | 3.52817         |                   |                   |
| H                                               | 1.25001  | 0.18847           | 4.19981         |                   |                   |
| H                                               | 2.37324  | -0.16942          | -0.83943        |                   |                   |
| H                                               | 2.09238  | 1.29395           | -0.25091        |                   |                   |
| H                                               | 2.61444  | -1.17850          | 1.18129         |                   |                   |
| H                                               | 4.22799  | 0.20023           | 2.41496         |                   |                   |
| H                                               | 3.70377  | 1.65522           | 1.58124         |                   |                   |
| H                                               | 5.22146  | -1.74334          | 0.96238         |                   |                   |
| H                                               | 4.71877  | 2.27755           | -0.50797        |                   |                   |
| H                                               | 6.26075  | 1.78285           | -2.37740        |                   |                   |
| H                                               | 6.76679  | -2.22678          | -0.90405        |                   |                   |
| H                                               | 7.28841  | -0.47099          | -2.58526        |                   |                   |
| Cu                                              | -0.17795 | 0.11891           | -0.18121        |                   |                   |
| N                                               | -0.76462 | 2.12287           | -0.42723        |                   |                   |
| N                                               | -2.11439 | -0.08401          | -0.25384        |                   |                   |
| N                                               | -0.32915 | -1.95288          | -0.38319        |                   |                   |
| C                                               | 0.00396  | 3.21197           | -0.57133        |                   |                   |
| C                                               | -0.51381 | 4.50474           | -0.63288        |                   |                   |
| C                                               | -1.89335 | 4.67283           | -0.53479        |                   |                   |
| C                                               | -2.70298 | 3.54505           | -0.39011        |                   |                   |
| C                                               | -2.11429 | 2.28152           | -0.34458        |                   |                   |
| C                                               | -2.88262 | 1.01912           | -0.23628        |                   |                   |
| C                                               | -4.26985 | 0.90967           | -0.15195        |                   |                   |
| C                                               | -4.83023 | -0.37266          | -0.09066        |                   |                   |
| C                                               | -4.01195 | -1.50942          | -0.13165        |                   |                   |
| C                                               | -2.63354 | -1.32408          | -0.21722        |                   |                   |
| C                                               | -1.61474 | -2.39590          | -0.31274        |                   |                   |
| C                                               | -1.91778 | -3.75598          | -0.36783        |                   |                   |
| C                                               | -0.88346 | -4.68200          | -0.51432        |                   |                   |
| C                                               | 0.42858  | -4.22151          | -0.60761        |                   |                   |
| C                                               | 0.65834  | -2.84856          | -0.53508        |                   |                   |
| H                                               | 1.07472  | 3.05641           | -0.65018        |                   |                   |
| H                                               | 0.15424  | 5.34969           | -0.75666        |                   |                   |
| H                                               | -2.33608 | 5.66271           | -0.57494        |                   |                   |
| H                                               | -3.77851 | 3.65622           | -0.32016        |                   |                   |
| H                                               | -4.91316 | 1.78008           | -0.13557        |                   |                   |
| Cl                                              | -6.53791 | -0.55377          | 0.02169         |                   |                   |
| H                                               | -4.45661 | -2.49587          | -0.09917        |                   |                   |
| H                                               | -2.94491 | -4.09597          | -0.30790        |                   |                   |
| H                                               | -1.10338 | -5.74352          | -0.56285        |                   |                   |
| H                                               | 1.26178  | -4.90314          | -0.73707        |                   |                   |
| H                                               | 1.66780  | -2.45908          | -0.60934        |                   |                   |

53

|                                             |                      |                   |                 |                   |
|---------------------------------------------|----------------------|-------------------|-----------------|-------------------|
| [Cu <sup>II</sup> (tpy)(Phe)] <sup>2+</sup> | TS-1,2-hydride shift | E=-2937.226364590 | H0=-2936.812295 | H298=-2936.782968 |
| C                                           | -1.27257             | -0.27852          | 0.72497         |                   |
| C                                           | -2.79062             | -0.41870          | 0.82674         |                   |
| C                                           | -3.65735             | -0.13646          | -0.25309        |                   |
| C                                           | -5.11711             | -0.17446          | -0.25617        |                   |
| C                                           | -5.88163             | -0.49088          | 0.88771         |                   |
| C                                           | -5.77385             | 0.13107           | -1.46727        |                   |
| C                                           | -7.16420             | 0.12397           | -1.53393        |                   |
| C                                           | -7.26923             | -0.50048          | 0.81335         |                   |
| C                                           | -7.91143             | -0.19430          | -0.39555        |                   |
| N                                           | -2.91853             | 1.47391           | 2.47317         |                   |
| O                                           | -0.80102             | -0.11461          | -0.47156        |                   |
| O                                           | -0.60495             | -0.34791          | 1.75553         |                   |



| Atom | x        | y        | z        |
|------|----------|----------|----------|
| H    | 1.23631  | 3.07780  |          |
| H    | 1.51153  | 3.05061  |          |
| H    | -2.76472 | 2.41752  | 2.12361  |
| H    | -3.16906 | -0.89475 | 1.72257  |
| H    | -3.12081 | -1.29717 | -0.19492 |
| H    | -3.17321 | 0.29084  | -1.13083 |
| H    | -5.39975 | -0.72014 | 1.83293  |
| H    | -5.19095 | 0.37342  | -2.35181 |
| H    | -7.66420 | 0.36227  | -2.46668 |
| H    | -7.85656 | -0.74049 | 1.69349  |
| H    | -8.99573 | -0.20205 | -0.44555 |
| Cu   | 1.14761  | -0.04482 | -0.31329 |
| N    | 1.41511  | 1.98236  | -0.41449 |
| N    | 3.07601  | 0.05331  | -0.02986 |
| N    | 1.61217  | -2.04150 | -0.35627 |
| C    | 0.47543  | 2.89716  | -0.68737 |
| C    | 0.75910  | 4.26248  | -0.72897 |
| C    | 2.06317  | 4.68148  | -0.47058 |
| C    | 3.04490  | 3.72759  | -0.18994 |
| C    | 2.69453  | 2.37892  | -0.17443 |
| C    | 3.64528  | 1.26623  | 0.06793  |
| C    | 5.00888  | 1.36972  | 0.35300  |
| C    | 5.74177  | 0.19212  | 0.52531  |
| C    | 5.12460  | -1.05550 | 0.40420  |
| C    | 3.75735  | -1.09468 | 0.11732  |
| C    | 2.91875  | -2.30222 | -0.07903 |
| C    | 3.39561  | -3.61001 | -0.01731 |
| C    | 2.51389  | -4.66716 | -0.25664 |
| C    | 1.18140  | -4.38845 | -0.55423 |
| C    | 0.77020  | -3.05594 | -0.59075 |
| H    | -0.51972 | 2.51189  | -0.88159 |
| H    | -0.02650 | 4.97241  | -0.96207 |
| H    | 2.31961  | 5.73569  | -0.49204 |
| H    | 4.06543  | 4.03654  | 0.00387  |
| H    | 5.49565  | 2.33361  | 0.44025  |
| H    | 6.80203  | 0.24739  | 0.74980  |
| H    | 5.70030  | -1.96448 | 0.52987  |
| H    | 4.43688  | -3.80930 | 0.20732  |
| H    | 2.86872  | -5.69180 | -0.21551 |
| H    | 0.46941  | -5.18072 | -0.75604 |
| H    | -0.25369 | -2.78297 | -0.82101 |

53

| [Cu <sup>II</sup> (tpy)(Phe)] <sup>2+</sup> | TS-phenonium | E=-2937.242643850 | H0=-2936.825926 | H298=-2936.796546 | G298=-2936.889546 |
|---------------------------------------------|--------------|-------------------|-----------------|-------------------|-------------------|
| C                                           | 1.86615      | -1.07108          | 0.35941         |                   |                   |
| C                                           | 3.20202      | -0.81416          | 1.05390         |                   |                   |
| C                                           | 4.31554      | -1.69937          | 0.89121         |                   |                   |
| C                                           | 4.58153      | -0.53346          | -0.12560        |                   |                   |
| C                                           | 4.29024      | -0.71636          | -1.50631        |                   |                   |
| C                                           | 5.40869      | 0.55298           | 0.28082         |                   |                   |
| C                                           | 5.95386      | 1.40269           | -0.66694        |                   |                   |
| C                                           | 4.84984      | 0.13724           | -2.44485        |                   |                   |
| C                                           | 5.67800      | 1.19093           | -2.02816        |                   |                   |
| N                                           | 2.10892      | -1.87833          | 3.36167         |                   |                   |
| O                                           | 0.96271      | -0.18965          | 0.65010         |                   |                   |
| O                                           | 1.75519      | -2.05027          | -0.37496        |                   |                   |
| H                                           | 1.31606      | -1.35924          | 3.73363         |                   |                   |
| H                                           | 2.80573      | -1.90943          | 4.10435         |                   |                   |
| H                                           | 1.79502      | -2.83774          | 3.22666         |                   |                   |
| H                                           | 3.24194      | -0.00620          | 1.77178         |                   |                   |
| H                                           | 4.11457      | -2.64353          | 0.39312         |                   |                   |
| H                                           | 5.06377      | -1.74169          | 1.67704         |                   |                   |
| H                                           | 3.64359      | -1.53300          | -1.80890        |                   |                   |
| H                                           | 5.63596      | 0.69052           | 1.33446         |                   |                   |
| H                                           | 6.60305      | 2.21666           | -0.36232        |                   |                   |
| H                                           | 4.65377      | -0.01412          | -3.50103        |                   |                   |
| H                                           | 6.11510      | 1.85278           | -2.77015        |                   |                   |
| Cu                                          | -0.88296     | -0.01882          | 0.14127         |                   |                   |
| N                                           | -0.76059     | 2.04442           | 0.29659         |                   |                   |
| N                                           | -2.76135     | 0.48547           | -0.14447        |                   |                   |
| N                                           | -1.72169     | -1.88553          | -0.16760        |                   |                   |
| C                                           | 0.35091      | 2.75134           | 0.53661         |                   |                   |
| C                                           | 0.33915      | 4.14415           | 0.62126         |                   |                   |
| C                                           | -0.87034     | 4.81486           | 0.45035         |                   |                   |
| C                                           | -2.03047     | 4.07699           | 0.20304         |                   |                   |

Electronic Supplementary Material  
 This journal is (c) The Owner Societies 2008

|      |          |          |          |
|------|----------|----------|----------|
| 1400 | CCP      | 2.68755  | 0.13213  |
| 1401 | CCP      | 1.78853  | -0.11402 |
| C    | -4.42598 | 2.17201  | -0.30002 |
| C    | -5.38257 | 1.17634  | -0.51236 |
| C    | -5.00944 | -0.16818 | -0.53755 |
| C    | -3.66222 | -0.49063 | -0.34728 |
| C    | -3.07258 | -1.84750 | -0.34972 |
| C    | -3.81487 | -3.01125 | -0.53409 |
| C    | -3.16016 | -4.24567 | -0.53678 |
| C    | -1.78023 | -4.27529 | -0.36343 |
| C    | -1.09356 | -3.07226 | -0.18332 |
| H    | 1.25513  | 2.16837  | 0.66593  |
| H    | 1.25951  | 4.68218  | 0.81819  |
| H    | -0.91636 | 5.89743  | 0.50946  |
| H    | -2.97971 | 4.58241  | 0.06978  |
| H    | -4.71806 | 3.21489  | -0.28008 |
| H    | -6.42234 | 1.45018  | -0.65876 |
| H    | -5.75312 | -0.93783 | -0.70337 |
| H    | -4.88793 | -2.96458 | -0.67638 |
| H    | -3.72370 | -5.16199 | -0.67943 |
| H    | -1.22806 | -5.20833 | -0.37180 |
| H    | -0.01535 | -3.03726 | -0.08315 |

53

| [Cu <sup>II</sup> (tpy)(Phe)] <sup>2+</sup> | TS-lactone | E=-2937.224633820 | H0=-2936.809376 | H298=-2936.779491 | G298=-2936.875794 |
|---------------------------------------------|------------|-------------------|-----------------|-------------------|-------------------|
| C                                           | -1.50478   | -0.19195          | 0.47901         |                   |                   |
| C                                           | -2.94984   | -0.21705          | 0.57372         |                   |                   |
| C                                           | -3.81757   | 0.93213           | 0.21240         |                   |                   |
| C                                           | -5.10491   | 0.54694           | -0.49479        |                   |                   |
| C                                           | -5.06140   | -0.09085          | -1.74354        |                   |                   |
| C                                           | -6.34499   | 0.84578           | 0.08378         |                   |                   |
| C                                           | -7.52987   | 0.51014           | -0.57624        |                   |                   |
| C                                           | -6.24694   | -0.42757          | -2.40025        |                   |                   |
| C                                           | -7.48199   | -0.12897          | -1.81767        |                   |                   |
| N                                           | -4.33499   | -1.13360          | 3.08508         |                   |                   |
| O                                           | -0.49664   | 0.11201           | 1.14944         |                   |                   |
| O                                           | -1.67708   | -0.64097          | -0.68828        |                   |                   |
| H                                           | -4.21679   | -0.47948          | 3.85716         |                   |                   |
| H                                           | -4.13850   | -2.05629          | 3.47019         |                   |                   |
| H                                           | -5.32898   | -1.13133          | 2.85891         |                   |                   |
| H                                           | -3.40692   | -1.14525          | 0.90353         |                   |                   |
| H                                           | -3.23946   | 1.68053           | -0.34384        |                   |                   |
| H                                           | -4.05128   | 1.39277           | 1.18759         |                   |                   |
| H                                           | -4.10630   | -0.31551          | -2.21108        |                   |                   |
| H                                           | -6.39116   | 1.35447           | 1.04381         |                   |                   |
| H                                           | -8.48630   | 0.75279           | -0.12404        |                   |                   |
| H                                           | -6.20607   | -0.91704          | -3.36825        |                   |                   |
| H                                           | -8.40224   | -0.38712          | -2.33186        |                   |                   |
| Cu                                          | 1.35242    | 0.02058           | 0.47961         |                   |                   |
| N                                           | 1.66943    | -1.98836          | 0.38761         |                   |                   |
| N                                           | 3.13125    | 0.02022           | -0.29563        |                   |                   |
| N                                           | 1.70304    | 2.02394           | 0.45580         |                   |                   |
| C                                           | 0.85149    | -2.95756          | 0.82315         |                   |                   |
| C                                           | 1.16767    | -4.31020          | 0.69839         |                   |                   |
| C                                           | 2.37432    | -4.66127          | 0.09699         |                   |                   |
| C                                           | 3.23286    | -3.65325          | -0.35073        |                   |                   |
| C                                           | 2.85947    | -2.32147          | -0.18960        |                   |                   |
| C                                           | 3.69342    | -1.16378          | -0.59170        |                   |                   |
| C                                           | 4.94905    | -1.19434          | -1.20339        |                   |                   |
| C                                           | 5.58014    | 0.02097           | -1.48412        |                   |                   |
| C                                           | 4.97164    | 1.23589           | -1.15563        |                   |                   |
| C                                           | 3.71534    | 1.20474           | -0.54571        |                   |                   |
| C                                           | 2.90110    | 2.36081           | -0.10058        |                   |                   |
| C                                           | 3.29579    | 3.69218           | -0.20354        |                   |                   |
| C                                           | 2.44907    | 4.69276           | 0.28276         |                   |                   |
| C                                           | 1.23315    | 4.33557           | 0.86212         |                   |                   |
| C                                           | 0.89459    | 2.98369           | 0.92840         |                   |                   |
| H                                           | -0.07322   | -2.63736          | 1.28930         |                   |                   |
| H                                           | 0.47851    | -5.06161          | 1.06678         |                   |                   |
| H                                           | 2.65138    | -5.70394          | -0.01985        |                   |                   |
| H                                           | 4.17941    | -3.90921          | -0.81228        |                   |                   |
| H                                           | 5.43020    | -2.13116          | -1.45739        |                   |                   |
| H                                           | 6.55556    | 0.02120           | -1.95983        |                   |                   |
| H                                           | 5.46991    | 2.17310           | -1.37269        |                   |                   |
| H                                           | 4.24895    | 3.95339           | -0.64837        |                   |                   |

Electronic Supplementary Material for PCCP  
 This journal is (c) The Owner Societies 2008  
 H -0.03617 2.64965 1.37342

Optimized geometries for the  $[\text{Cu}^{\text{II}}(\text{tpy})(\text{Tyr})]^{2+}$  as shown in Table 1, Figure 4b

| [Cu <sup>II</sup> (tpy)(Tyr)] <sup>2+</sup> | 54 | (1)      | E=-3012.533846330 | H0=-3012.106236 | H298=-3012.077418 | G298=-3012.168685 |
|---------------------------------------------|----|----------|-------------------|-----------------|-------------------|-------------------|
| C                                           |    | -1.01395 | -0.59931          | 0.34092         |                   |                   |
| C                                           |    | -2.52255 | -0.86120          | 0.16638         |                   |                   |
| C                                           |    | -3.29705 | 0.40226           | -0.29958        |                   |                   |
| C                                           |    | -4.79736 | 0.24388           | -0.18232        |                   |                   |
| C                                           |    | -5.53276 | -0.47497          | -1.13866        |                   |                   |
| C                                           |    | -5.49093 | 0.78803           | 0.91613         |                   |                   |
| C                                           |    | -6.86592 | 0.61535           | 1.06398         |                   |                   |
| C                                           |    | -6.90856 | -0.65027          | -1.00653        |                   |                   |
| C                                           |    | -7.58251 | -0.10855          | 0.10045         |                   |                   |
| N                                           |    | -3.02812 | -1.28840          | 1.53073         |                   |                   |
| O                                           |    | -0.35008 | -0.44667          | -0.74979        |                   |                   |
| O                                           |    | -0.55727 | -0.52183          | 1.49159         |                   |                   |
| O                                           |    | -8.91438 | -0.23791          | 0.29783         |                   |                   |
| H                                           |    | -2.34350 | -0.91493          | 2.21682         |                   |                   |
| H                                           |    | -3.05640 | -2.30455          | 1.64295         |                   |                   |
| H                                           |    | -3.98020 | -0.91790          | 1.68821         |                   |                   |
| H                                           |    | -2.69989 | -1.68385          | -0.52881        |                   |                   |
| H                                           |    | -2.99055 | 0.58641           | -1.33354        |                   |                   |
| H                                           |    | -2.96349 | 1.26005           | 0.29699         |                   |                   |
| H                                           |    | -5.03433 | -0.88712          | -2.01314        |                   |                   |
| H                                           |    | -4.96140 | 1.39955           | 1.64539         |                   |                   |
| H                                           |    | -7.40157 | 1.05081           | 1.90058         |                   |                   |
| H                                           |    | -7.46064 | -1.19623          | -1.76699        |                   |                   |
| H                                           |    | -9.34389 | -0.70961          | -0.42983        |                   |                   |
| Cu                                          |    | 1.52594  | -0.06892          | -0.39694        |                   |                   |
| N                                           |    | 1.49595  | 1.97494           | -0.45200        |                   |                   |
| N                                           |    | 3.37471  | 0.30413           | 0.10188         |                   |                   |
| N                                           |    | 2.27915  | -1.97102          | -0.39934        |                   |                   |
| C                                           |    | 0.46690  | 2.74765           | -0.82400        |                   |                   |
| C                                           |    | 0.54463  | 4.14067           | -0.81716        |                   |                   |
| C                                           |    | 1.73215  | 4.74085           | -0.40272        |                   |                   |
| C                                           |    | 2.80836  | 3.93550           | -0.02026        |                   |                   |
| C                                           |    | 2.66595  | 2.55019           | -0.06061        |                   |                   |
| C                                           |    | 3.74068  | 1.58468           | 0.27669         |                   |                   |
| C                                           |    | 5.03400  | 1.87982           | 0.71541         |                   |                   |
| C                                           |    | 5.91107  | 0.81872           | 0.95648         |                   |                   |
| C                                           |    | 5.50489  | -0.50302          | 0.75301         |                   |                   |
| C                                           |    | 4.19932  | -0.73501          | 0.31269         |                   |                   |
| C                                           |    | 3.57539  | -2.04635          | 0.00873         |                   |                   |
| C                                           |    | 4.23295  | -3.27178          | 0.09419         |                   |                   |
| C                                           |    | 3.54767  | -4.43689          | -0.26048        |                   |                   |
| C                                           |    | 2.22618  | -4.34565          | -0.69390        |                   |                   |
| C                                           |    | 1.62542  | -3.08757          | -0.74575        |                   |                   |
| H                                           |    | -0.43000 | 2.22635           | -1.14034        |                   |                   |
| H                                           |    | -0.30751 | 4.73192           | -1.13293        |                   |                   |
| H                                           |    | 1.82740  | 5.82162           | -0.38208        |                   |                   |
| H                                           |    | 3.74195  | 4.38688           | 0.29465         |                   |                   |
| H                                           |    | 5.35857  | 2.90217           | 0.86732         |                   |                   |
| H                                           |    | 6.91992  | 1.02355           | 1.29982         |                   |                   |
| H                                           |    | 6.19280  | -1.32017          | 0.93370         |                   |                   |
| H                                           |    | 5.26424  | -3.32431          | 0.42311         |                   |                   |
| H                                           |    | 4.04581  | -5.39932          | -0.20433        |                   |                   |
| H                                           |    | 1.66658  | -5.22559          | -0.99050        |                   |                   |
| H                                           |    | 0.60205  | -2.95565          | -1.08016        |                   |                   |
| [Cu <sup>II</sup> (tpy)(Tyr)] <sup>2+</sup> | 54 | (2)      | E=-3012.518197100 | H0=-3012.090904 | H298=-3012.062242 | G298=-3012.152790 |
| C                                           |    | 0.73332  | -0.70805          | 2.43190         |                   |                   |
| C                                           |    | 1.77819  | -0.83660          | 1.32860         |                   |                   |
| C                                           |    | 3.05396  | 0.00367           | 1.64531         |                   |                   |
| C                                           |    | 4.06003  | -0.01995          | 0.51630         |                   |                   |
| C                                           |    | 4.85030  | -1.15462          | 0.27388         |                   |                   |
| C                                           |    | 4.22827  | 1.09263           | -0.32572        |                   |                   |
| C                                           |    | 5.13674  | 1.07719           | -1.38166        |                   |                   |
| C                                           |    | 5.76548  | -1.18615          | -0.77672        |                   |                   |
| C                                           |    | 5.91035  | -0.06832          | -1.61399        |                   |                   |
| N                                           |    | 1.15901  | -0.46921          | 0.01382         |                   |                   |
| O                                           |    | -0.41391 | -0.31633          | 2.24828         |                   |                   |

| Atom | x        | y        | z        |
|------|----------|----------|----------|
| O    | 0.51824  | -0.97222 | 4.30057  |
| H    | 1.33004  | -1.22006 | -0.65457 |
| H    | 1.68991  | 0.31130  | -0.38187 |
| H    | 2.07606  | -1.88996 | 1.29321  |
| H    | 3.47890  | -0.39477 | 2.57096  |
| H    | 2.75541  | 1.03695  | 1.86233  |
| H    | 4.77656  | -2.02150 | 0.92707  |
| H    | 3.67716  | 2.01100  | -0.12929 |
| H    | 5.27963  | 1.94478  | -2.01675 |
| H    | 6.37944  | -2.06896 | -0.93459 |
| H    | 7.31898  | -0.82246 | -2.70567 |
| Cu   | -0.87816 | -0.05691 | 0.04311  |
| N    | -0.85638 | 2.02402  | 0.06666  |
| N    | -2.74622 | 0.31910  | -0.41300 |
| N    | -1.58555 | -1.99460 | -0.27477 |
| C    | 0.17421  | 2.83062  | 0.35751  |
| C    | 0.05665  | 4.21843  | 0.40996  |
| C    | -1.18788 | 4.79026  | 0.15311  |
| C    | -2.26806 | 3.95697  | -0.14200 |
| C    | -2.07611 | 2.57592  | -0.17829 |
| C    | -3.15012 | 1.60030  | -0.47167 |
| C    | -4.47674 | 1.90033  | -0.79288 |
| C    | -5.35519 | 0.84617  | -1.04995 |
| C    | -4.90797 | -0.47534 | -0.99164 |
| C    | -3.57008 | -0.71303 | -0.66611 |
| C    | -2.91319 | -2.03649 | -0.57078 |
| C    | -3.57566 | -3.24918 | -0.76347 |
| C    | -2.86350 | -4.44398 | -0.64944 |
| C    | -1.50499 | -4.39480 | -0.34151 |
| C    | -0.90993 | -3.14777 | -0.16150 |
| H    | 1.12601  | 2.35298  | 0.55958  |
| H    | 0.92224  | 4.82663  | 0.64753  |
| H    | -1.32062 | 5.86677  | 0.18459  |
| H    | -3.24500 | 4.38336  | -0.33615 |
| H    | -4.82420 | 2.92474  | -0.84747 |
| H    | -6.38989 | 1.05504  | -1.30162 |
| H    | -5.58985 | -1.29062 | -1.20010 |
| H    | -4.63335 | -3.26834 | -0.99757 |
| H    | -3.36436 | -5.39520 | -0.79720 |
| H    | -0.91242 | -5.29723 | -0.24121 |
| H    | 0.14382  | -3.07743 | 0.08566  |

Optimized geometries for the  $[\text{Cu}^{\text{II}}(\text{tpy})(\text{Trp})]^{2+}$  as shown in Table 1, Figure 4c

| [Cu <sup>II</sup> (tpy)(Trp)] <sup>2+</sup> | (1)      | E=-3068.891956050 | H0=-3068.438945 | H298=-3068.409345 | G298=-3068.502269 |
|---------------------------------------------|----------|-------------------|-----------------|-------------------|-------------------|
| C                                           | -0.73754 | -0.73032          | 0.13087         | 0.77059           | -0.00373          |
| C                                           | -2.20221 | -1.12042          | -0.14820        | -0.15151          | 0.00525           |
| C                                           | -2.98609 | -0.00429          | -0.89365        | -0.46420          | -0.00012          |
| C                                           | -4.46674 | -0.24210          | -0.91452        | -0.17858          | 0.00008           |
| C                                           | -5.19849 | -0.89896          | -1.88318        | -0.00009          | 0.00025           |
| C                                           | -5.40108 | 0.13066           | 0.12688         | -0.13645          | -0.00003          |
| C                                           | -6.67926 | -0.34881          | -0.27577        | 0.15148           | 0.00004           |
| C                                           | -5.29309 | 0.83786           | 1.34682         | -0.26581          | 0.00017           |
| C                                           | -6.43385 | 1.01893           | 2.12238         | -0.23324          | -0.00003          |
| C                                           | -7.82821 | -0.16299          | 0.50129         | -0.23281          | 0.00007           |
| C                                           | -7.68601 | 0.51863           | 1.70522         | -0.21881          | 0.00013           |
| N                                           | -2.82548 | -1.38870          | 1.20977         | -0.79432          | 0.00084           |
| N                                           | -6.51620 | -0.96437          | -1.50203        | -0.54430          | 0.00005           |
| O                                           | 0.01958  | -0.65291          | -0.90681        | -0.82277          | 0.07929           |
| O                                           | -0.39791 | -0.48919          | 1.29932         | -0.69429          | -0.00009          |
| H                                           | -2.20987 | -0.91662          | 1.90007         | 0.48493           | -0.00003          |
| H                                           | -2.84355 | -2.38440          | 1.44203         | 0.46623           | -0.00001          |
| H                                           | -3.79542 | -1.03007          | 1.25890         | 0.48310           | 0.00018           |
| H                                           | -2.25373 | -2.04573          | -0.72501        | 0.27607           | -0.00021          |
| H                                           | -2.57188 | 0.03600           | -1.90506        | 0.28041           | 0.00001           |
| H                                           | -2.76553 | 0.96061           | -0.41855        | 0.25064           | 0.00003           |
| H                                           | -4.87836 | -1.31354          | -2.82951        | 0.25063           | -0.00001          |
| H                                           | -7.25891 | -1.36423          | -2.05705        | 0.45850           | 0.00000           |
| H                                           | -4.35092 | 1.28381           | 1.66164         | 0.23284           | 0.00000           |
| H                                           | -6.36755 | 1.57034           | 3.05474         | 0.25508           | 0.00000           |
| H                                           | -8.79708 | -0.53051          | 0.17765         | 0.25941           | 0.00000           |
| H                                           | -8.55764 | 0.68104           | 2.33045         | 0.26015           | -0.00001          |

Electronic Supplementary Material for PCCP  
 This journal is (c) The Owner Societies 2008

|   |          |          |          |          |          |          |
|---|----------|----------|----------|----------|----------|----------|
| N | 3.59918  | 0.42557  | -0.10662 | -0.43213 | 0.78801  | 0.59983  |
| N | 2.70693  | -1.94536 | 1.92648  | -0.59348 | -0.56856 | 0.09868  |
| C | 0.60322  | 2.60438  | 0.42557  | 0.17806  | 2.44127  | 0.08191  |
| C | 0.57953  | 3.99846  | -1.94536 | -0.27992 | -0.56488 | 0.09936  |
| C | 1.68624  | 4.70239  | 2.60438  | -1.07365 | 0.06391  | -0.00743 |
| C | 2.78572  | 3.99608  | 0.57953  | -1.12461 | -0.23402 | 0.00584  |
| C | 2.74640  | 2.60343  | 1.68624  | -0.65377 | -0.14175 | -0.00414 |
| C | 3.85915  | 1.73630  | 2.78572  | -0.15857 | -0.21865 | 0.00284  |
| C | 5.09212  | 2.14660  | 2.74640  | -0.14541 | 0.14124  | 0.00065  |
| C | 6.02219  | 1.16584  | 3.85915  | 0.31416  | -0.80921 | 0.00994  |
| C | 5.72732  | -0.19028 | 5.09212  | 0.82776  | -0.29457 | 0.00631  |
| C | 4.47781  | -0.53867 | 6.02219  | 1.18284  | -0.13609 | -0.00365 |
| C | 3.97271  | -1.90540 | 5.72732  | 1.01772  | -0.28273 | 0.00611  |
| C | 4.70769  | -3.07349 | 4.47781  | 0.49865  | -0.85170 | 0.01064  |
| C | 4.13361  | -4.30105 | 3.97271  | 0.21871  | 0.13660  | 0.00088  |
| C | 2.84313  | -4.32811 | 4.70769  | 0.40952  | -0.21383 | 0.00285  |
| C | 2.15968  | -3.12163 | 4.13361  | 0.06790  | -0.14211 | -0.00419 |
| H | -0.22801 | 2.00586  | 2.84313  | -0.45743 | -0.23440 | 0.00592  |
| H | -0.28707 | 4.51067  | 2.15968  | -0.61302 | 0.06348  | -0.00750 |
| H | 1.70154  | 5.78722  | -0.22801 | -1.42999 | 0.25219  | 0.00299  |
| H | 3.65805  | 4.52852  | -0.28707 | -1.52717 | 0.27683  | 0.00047  |
| H | 5.33098  | 3.19611  | 1.70154  | -0.67531 | 0.27817  | 0.00011  |
| H | 6.98576  | 1.46052  | 3.65805  | 0.20204  | 0.26831  | 0.00089  |
| H | 6.45654  | -0.94468 | 5.33098  | 0.95040  | 0.26906  | 0.00139  |
| H | 5.71455  | -3.03512 | 6.98576  | 1.58573  | 0.28207  | 0.00006  |
| H | 4.69381  | -5.22019 | 6.45654  | 1.28746  | 0.26918  | 0.00140  |
| H | 2.36954  | -5.25967 | 5.71455  | 0.80871  | 0.26841  | 0.00090  |
| H | 1.15527  | -3.08070 | 4.69381  | 0.20550  | 0.27822  | 0.00011  |
|   |          |          | 2.36954  | -0.74604 | 0.27675  | 0.00047  |
|   |          |          | 1.15527  | -1.02049 | 0.25376  | 0.00299  |

57

| [Cu <sup>II</sup> (tpy)(Trp)] <sup>2+</sup> | (2)      | E=-3068.876614880 | H0=-3068.423859 | H298=-3068.394426 | G298=-3068.486478 |
|---------------------------------------------|----------|-------------------|-----------------|-------------------|-------------------|
| C                                           | -0.27228 | -0.76150          | 2.37094         |                   |                   |
| C                                           | -1.39401 | -0.72619          | 1.34200         |                   |                   |
| C                                           | -2.58956 | -1.67394          | 1.61527         |                   |                   |
| C                                           | -3.60701 | -1.58982          | 0.51443         |                   |                   |
| C                                           | -4.00893 | -2.61526          | -0.31726        |                   |                   |
| C                                           | -4.34802 | -0.41581          | 0.10906         |                   |                   |
| C                                           | -5.17067 | -0.80494          | -0.98463        |                   |                   |
| C                                           | -4.43050 | 0.91245           | 0.58041         |                   |                   |
| C                                           | -5.29272 | 1.80067           | -0.05462        |                   |                   |
| C                                           | -6.03775 | 0.08682           | -1.62729        |                   |                   |
| C                                           | -6.08198 | 1.39296           | -1.15230        |                   |                   |
| N                                           | -0.79052 | -0.94084          | -0.01142        |                   |                   |
| N                                           | -4.93863 | -2.14809          | -1.21653        |                   |                   |
| O                                           | 0.90799  | -0.61554          | 2.07130         |                   |                   |
| O                                           | -0.70575 | -0.91583          | 3.61169         |                   |                   |
| H                                           | 0.04207  | -0.88293          | 4.23739         |                   |                   |
| H                                           | -1.48637 | -0.64789          | -0.70143        |                   |                   |
| H                                           | -0.71894 | -1.94964          | -0.15808        |                   |                   |
| H                                           | -1.76900 | 0.30373           | 1.35818         |                   |                   |
| H                                           | -3.01690 | -1.39461          | 2.58464         |                   |                   |
| H                                           | -2.22421 | -2.70302          | 1.72214         |                   |                   |
| H                                           | -3.72448 | -3.65908          | -0.31191        |                   |                   |
| H                                           | -5.43381 | -2.71852          | -1.88629        |                   |                   |
| H                                           | -3.88333 | 1.23200           | 1.46453         |                   |                   |
| H                                           | -5.38912 | 2.81614           | 0.31724         |                   |                   |
| H                                           | -6.66500 | -0.22927          | -2.45509        |                   |                   |
| H                                           | -6.75321 | 2.10635           | -1.61913        |                   |                   |
| Cu                                          | 1.06205  | -0.10597          | -0.20818        |                   |                   |
| N                                           | 2.24669  | -1.78685          | -0.61753        |                   |                   |
| N                                           | 2.83082  | 0.71408           | -0.25964        |                   |                   |
| N                                           | 0.53008  | 1.90495           | -0.28830        |                   |                   |
| C                                           | 1.85950  | -3.04516          | -0.87002        |                   |                   |
| C                                           | 2.75938  | -4.09779          | -1.02898        |                   |                   |
| C                                           | 4.12188  | -3.82918          | -0.91446        |                   |                   |
| C                                           | 4.53496  | -2.52019          | -0.66094        |                   |                   |
| C                                           | 3.57729  | -1.51552          | -0.52269        |                   |                   |
| C                                           | 3.90784  | -0.08769          | -0.30380        |                   |                   |
| C                                           | 5.18757  | 0.46139           | -0.18268        |                   |                   |
| C                                           | 5.30637  | 1.84334           | -0.02118        |                   |                   |
| C                                           | 4.16970  | 2.65475           | -0.00070        |                   |                   |
| C                                           | 2.91720  | 2.04889           | -0.12908        |                   |                   |
| C                                           | 1.60462  | 2.73486           | -0.17711        |                   |                   |

|   |          |          |          |
|---|----------|----------|----------|
|   |          | 4.12057  | -0.15878 |
| C |          | 4.66826  | -0.27437 |
| C | -0.92117 | 3.81398  | -0.41140 |
| C | -0.69563 | 2.43809  | -0.41021 |
| H | 0.79323  | -3.22476 | -0.96130 |
| H | 2.39297  | -5.09637 | -1.23892 |
| H | 4.85463  | -4.62152 | -1.02736 |
| H | 5.59074  | -2.29047 | -0.58018 |
| H | 6.07315  | -0.16154 | -0.21366 |
| H | 6.28963  | 2.29133  | 0.07950  |
| H | 4.26793  | 3.72779  | 0.11014  |
| H | 2.31279  | 4.77019  | -0.06759 |
| H | 0.03570  | 5.74493  | -0.26681 |
| H | -1.93108 | 4.19282  | -0.52048 |
| H | -1.52924 | 1.75148  | -0.51627 |

57

|                                             |                |                   |                 |                   |                   |
|---------------------------------------------|----------------|-------------------|-----------------|-------------------|-------------------|
| [Cu <sup>II</sup> (tpy)(Trp)] <sup>2+</sup> | (TS-phenonium) | E=-3068.839203900 | H0=-3068.391701 | H298=-3068.360969 | G298=-3068.455414 |
| C                                           | -0.91814       | -1.27400          | -1.08079        |                   |                   |
| C                                           | -2.11302       | -2.14922          | -1.37941        |                   |                   |
| C                                           | -2.93353       | -2.81774          | -0.36966        |                   |                   |
| C                                           | -3.74310       | -1.54225          | -0.34949        |                   |                   |
| C                                           | -4.72923       | -1.20774          | -1.30116        |                   |                   |
| C                                           | -3.80951       | -0.51459          | 0.68046         |                   |                   |
| C                                           | -4.84295       | 0.37390           | 0.29800         |                   |                   |
| C                                           | -3.15613       | -0.30981          | 1.90476         |                   |                   |
| C                                           | -3.54474       | 0.77229           | 2.69350         |                   |                   |
| C                                           | -5.23999       | 1.46142           | 1.07671         |                   |                   |
| C                                           | -4.56933       | 1.64850           | 2.28480         |                   |                   |
| N                                           | -0.70087       | -3.81674          | -2.30372        |                   |                   |
| N                                           | -5.36215       | -0.08594          | -0.91793        |                   |                   |
| O                                           | -0.58439       | -1.12327          | 0.16427         |                   |                   |
| O                                           | -0.29114       | -0.78664          | -2.03046        |                   |                   |
| H                                           | -0.11921       | -3.27578          | -2.94123        |                   |                   |
| H                                           | -1.22701       | -4.49605          | -2.85041        |                   |                   |
| H                                           | -0.09151       | -4.33690          | -1.67664        |                   |                   |
| H                                           | -2.45272       | -2.11711          | -2.40468        |                   |                   |
| H                                           | -2.43104       | -2.99600          | 0.57916         |                   |                   |
| H                                           | -3.48025       | -3.69616          | -0.71159        |                   |                   |
| H                                           | -5.01194       | -1.72777          | -2.20706        |                   |                   |
| H                                           | -6.12595       | 0.34453           | -1.42428        |                   |                   |
| H                                           | -2.36803       | -0.97828          | 2.23147         |                   |                   |
| H                                           | -3.06007       | 0.93645           | 3.65062         |                   |                   |
| H                                           | -6.05014       | 2.11749           | 0.77397         |                   |                   |
| H                                           | -4.85704       | 2.47165           | 2.93061         |                   |                   |
| Cu                                          | 1.04264        | -0.04253          | 0.12017         |                   |                   |
| N                                           | 2.36960        | -1.52392          | 0.62525         |                   |                   |
| N                                           | 2.72840        | 0.93649           | -0.03943        |                   |                   |
| N                                           | 0.32608        | 1.86292           | -0.15895        |                   |                   |
| C                                           | 2.05850        | -2.76094          | 1.03435         |                   |                   |
| C                                           | 3.03636        | -3.70233          | 1.35732         |                   |                   |
| C                                           | 4.37729        | -3.33884          | 1.24089         |                   |                   |
| C                                           | 4.70182        | -2.04678          | 0.81985         |                   |                   |
| C                                           | 3.67406        | -1.15270          | 0.52422         |                   |                   |
| C                                           | 3.87822        | 0.25931           | 0.11623         |                   |                   |
| C                                           | 5.09836        | 0.90920           | -0.08377        |                   |                   |
| C                                           | 5.07893        | 2.26088           | -0.43909        |                   |                   |
| C                                           | 3.86801        | 2.94330           | -0.57755        |                   |                   |
| C                                           | 2.67981        | 2.23844           | -0.36378        |                   |                   |
| C                                           | 1.29848        | 2.77467           | -0.43062        |                   |                   |
| C                                           | 0.98461        | 4.10018           | -0.72323        |                   |                   |
| C                                           | -0.35557       | 4.49517           | -0.72586        |                   |                   |
| C                                           | -1.34174       | 3.55570           | -0.43411        |                   |                   |
| C                                           | -0.95745       | 2.24248           | -0.15868        |                   |                   |
| H                                           | 0.99854        | -2.98128          | 1.10611         |                   |                   |
| H                                           | 2.74696        | -4.69116          | 1.69521         |                   |                   |
| H                                           | 5.16437        | -4.04619          | 1.48125         |                   |                   |
| H                                           | 5.73937        | -1.74526          | 0.73567         |                   |                   |
| H                                           | 6.04104        | 0.38802           | 0.03184         |                   |                   |
| H                                           | 6.01396        | 2.78688           | -0.60232        |                   |                   |
| H                                           | 3.86051        | 3.99362           | -0.84263        |                   |                   |
| H                                           | 1.76547        | 4.81890           | -0.94247        |                   |                   |
| H                                           | -0.61888       | 5.52391           | -0.94924        |                   |                   |
| H                                           | -2.39144       | 3.82514           | -0.41574        |                   |                   |
| H                                           | -1.68491       | 1.47351           | 0.07719         |                   |                   |

|                                             |    |          |                   |          |          |          |
|---------------------------------------------|----|----------|-------------------|----------|----------|----------|
|                                             | 57 | Cu-O=3.0 | E=-3068.857549880 |          |          |          |
| [Cu <sup>II</sup> (tpy)(Trp)] <sup>2+</sup> |    |          |                   |          |          |          |
| C                                           |    | 1.46057  | -0.52729          | 0.83265  | 0.83081  | -0.00024 |
| C                                           |    | 2.96166  | -0.25739          | 1.09605  | -0.16637 | 0.01021  |
| C                                           |    | 3.59115  | 0.37120           | -0.17920 | -0.47237 | -0.00435 |
| C                                           |    | 5.03824  | 0.73326           | -0.02321 | -0.06135 | 0.13787  |
| C                                           |    | 5.54675  | 1.86406           | 0.62814  | 0.03091  | 0.06300  |
| C                                           |    | 6.17583  | 0.00169           | -0.50084 | -0.11925 | -0.02329 |
| C                                           |    | 7.33789  | 0.72272           | -0.11105 | 0.14127  | 0.00223  |
| C                                           |    | 6.33341  | -1.19113          | -1.24266 | -0.16167 | 0.11552  |
| C                                           |    | 7.62064  | -1.62622          | -1.55556 | -0.24283 | -0.03067 |
| C                                           |    | 8.62479  | 0.29868           | -0.41878 | -0.20524 | 0.04835  |
| C                                           |    | 8.74936  | -0.89502          | -1.14890 | -0.17811 | 0.08285  |
| N                                           |    | 3.58164  | -1.53323          | 1.48321  | -0.93247 | 0.00023  |
| N                                           |    | 6.90372  | 1.85232           | 0.57731  | -0.51392 | 0.06756  |
| O                                           |    | 0.64487  | 0.35383           | 0.60557  | -0.66225 | 0.01511  |
| O                                           |    | 1.13918  | -1.81446          | 0.86380  | -0.72072 | 0.00221  |
| H                                           |    | 2.00627  | -2.26914          | 1.09608  | 0.54033  | -0.00009 |
| H                                           |    | 3.80027  | -1.57782          | 2.47443  | 0.42657  | 0.00005  |
| H                                           |    | 4.43789  | -1.73013          | 0.97264  | 0.42319  | 0.00001  |
| H                                           |    | 3.00851  | 0.47587           | 1.90922  | 0.26460  | -0.00038 |
| H                                           |    | 2.99647  | 1.25444           | -0.43322 | 0.27711  | 0.00345  |
| H                                           |    | 3.47733  | -0.33200          | -1.01262 | 0.25706  | 0.00060  |
| H                                           |    | 5.01766  | 2.67500           | 1.11009  | 0.25351  | -0.00199 |
| H                                           |    | 7.50455  | 2.56974           | 0.96033  | 0.46430  | -0.00194 |
| H                                           |    | 5.47121  | -1.75780          | -1.58314 | 0.24446  | -0.00332 |
| H                                           |    | 7.75560  | -2.53782          | -2.12772 | 0.26276  | 0.00076  |
| H                                           |    | 9.50318  | 0.85998           | -0.11624 | 0.26385  | -0.00135 |
| H                                           |    | 9.74003  | -1.25346          | -1.40792 | 0.26449  | -0.00241 |
| Cu                                          |    | -2.29580 | -0.01753          | 0.14233  | 1.10998  | 0.32977  |
| N                                           |    | -2.40375 | 1.99699           | 0.06831  | -0.56194 | 0.04636  |
| N                                           |    | -4.23034 | 0.17893           | -0.21980 | -0.54456 | 0.10219  |
| N                                           |    | -2.80856 | -1.97047          | 0.11412  | -0.56689 | 0.04289  |
| C                                           |    | -1.39631 | 2.86760           | 0.23650  | 0.05924  | -0.00332 |
| C                                           |    | -1.58930 | 4.24850           | 0.17004  | -0.24942 | 0.00304  |
| C                                           |    | -2.86942 | 4.73542           | -0.08076 | -0.14069 | -0.00183 |
| C                                           |    | -3.92025 | 3.83099           | -0.25694 | -0.20172 | 0.00056  |
| C                                           |    | -3.66488 | 2.46445           | -0.17740 | 0.17306  | 0.00026  |
| C                                           |    | -4.71257 | 1.41728           | -0.34507 | 0.17054  | -0.00520 |
| C                                           |    | -6.07633 | 1.59030           | -0.60489 | -0.15550 | 0.00500  |
| C                                           |    | -6.87143 | 0.44413           | -0.72031 | -0.17419 | -0.00400 |
| C                                           |    | -6.32468 | -0.83659          | -0.58054 | -0.21047 | 0.00505  |
| C                                           |    | -4.95323 | -0.93810          | -0.32140 | 0.18831  | -0.00527 |
| C                                           |    | -4.13997 | -2.17254          | -0.12927 | 0.18580  | 0.00040  |
| C                                           |    | -4.67256 | -3.45785          | -0.18485 | -0.22126 | 0.00044  |
| C                                           |    | -3.83386 | -4.55803          | 0.01276  | -0.14586 | -0.00168 |
| C                                           |    | -2.48130 | -4.34267          | 0.26150  | -0.23841 | 0.00273  |
| C                                           |    | -2.00627 | -3.03087          | 0.30421  | 0.05620  | -0.00330 |
| H                                           |    | -0.42175 | 2.43125           | 0.42773  | 0.26676  | 0.00136  |
| H                                           |    | -0.74852 | 4.91770           | 0.31331  | 0.27176  | 0.00018  |
| H                                           |    | -3.05489 | 5.80302           | -0.13910 | 0.27766  | 0.00006  |
| H                                           |    | -4.92333 | 4.19212           | -0.45212 | 0.26667  | 0.00042  |
| H                                           |    | -6.51807 | 2.57360           | -0.71572 | 0.26207  | 0.00071  |
| H                                           |    | -7.93249 | 0.55065           | -0.92163 | 0.27674  | 0.00012  |
| H                                           |    | -6.95668 | -1.71194          | -0.67238 | 0.26902  | 0.00071  |
| H                                           |    | -5.72857 | -3.60622          | -0.37830 | 0.26576  | 0.00038  |
| H                                           |    | -4.23730 | -5.56460          | -0.02721 | 0.27530  | 0.00006  |
| H                                           |    | -1.79678 | -5.16790          | 0.42194  | 0.27420  | 0.00020  |
| H                                           |    | -0.96116 | -2.81245          | 0.49553  | 0.26440  | 0.00150  |
|                                             | 57 | Cu-O=4.0 | E=-3068.851747060 |          |          |          |
| [Cu <sup>II</sup> (tpy)(Trp)] <sup>2+</sup> |    |          |                   |          |          |          |
| C                                           |    | -1.80145 | -0.28064          | -0.44701 | 0.81925  | 0.00099  |
| C                                           |    | -3.31456 | -0.47984          | -0.72277 | -0.17127 | 0.01203  |
| C                                           |    | -4.14718 | 0.54202           | 0.09712  | -0.48390 | -0.00448 |
| C                                           |    | -5.59026 | 0.60995           | -0.29827 | -0.02005 | 0.18530  |
| C                                           |    | -6.10086 | 1.26475           | -1.43704 | 0.04565  | 0.09427  |
| C                                           |    | -6.72191 | 0.05229           | 0.37637  | -0.12052 | -0.03311 |
| C                                           |    | -7.87865 | 0.38260           | -0.38247 | 0.14076  | 0.00708  |
| C                                           |    | -6.88239 | -0.68369          | 1.57243  | -0.13547 | 0.14825  |
| C                                           |    | -8.16511 | -1.07338          | 1.95938  | -0.24481 | -0.04063 |
| C                                           |    | -9.15820 | 0.00243           | -0.00910 | -0.19891 | 0.05541  |
| C                                           |    | -9.28459 | -0.73919          | 1.18204  | -0.16551 | 0.10845  |

Electronic Supplementary Material for  
 This journal is (c) The Owner Societies 2008

1400 PCP

|    |           |          |          |          |          |
|----|-----------|----------|----------|----------|----------|
|    |           | -1.89528 | -0.52384 | -0.92755 | 0.00327  |
| O  |           | 1.12315  | -1.48380 | -0.50540 | 0.08750  |
| O  | -1.27347  | 0.80972  | -0.36331 | -0.62727 | 0.00600  |
| O  | -1.11954  | -1.42577 | -0.34794 | -0.72405 | 0.00245  |
| H  | -1.81307  | -2.13535 | -0.43152 | 0.53640  | -0.00004 |
| H  | -4.26197  | -2.26705 | -1.23770 | 0.42573  | -0.00008 |
| H  | -4.06441  | -2.08045 | 0.38330  | 0.41133  | -0.00005 |
| H  | -3.43260  | -0.25402 | -1.78978 | 0.26880  | -0.00050 |
| H  | -3.67183  | 1.52047  | -0.02951 | 0.28811  | 0.00559  |
| H  | -4.06342  | 0.29294  | 1.16140  | 0.25561  | 0.00073  |
| H  | -5.57349  | 1.82874  | -2.19479 | 0.25902  | -0.00296 |
| H  | -8.04535  | 1.51950  | -2.19513 | 0.46750  | -0.00252 |
| H  | -6.02791  | -0.93167 | 2.19500  | 0.24594  | -0.00430 |
| H  | -8.30282  | -1.63549 | 2.87667  | 0.26551  | 0.00101  |
| H  | -10.03284 | 0.26200  | -0.59710 | 0.26632  | -0.00154 |
| H  | -10.27242 | -1.05063 | 1.50494  | 0.26654  | -0.00317 |
| Cu | 2.60950   | -0.09471 | -0.04000 | 1.02330  | 0.23780  |
| N  | 2.56835   | 1.91239  | 0.06018  | -0.56325 | 0.03175  |
| N  | 4.56117   | 0.24098  | 0.11785  | -0.55138 | 0.07710  |
| N  | 3.25982   | -2.00082 | -0.09532 | -0.55682 | 0.02941  |
| C  | 1.48664   | 2.70834  | 0.02334  | 0.05649  | -0.00251 |
| C  | 1.58456   | 4.09875  | 0.10827  | -0.24108 | 0.00210  |
| C  | 2.84422   | 4.67694  | 0.23449  | -0.15021 | -0.00127 |
| C  | 3.97167   | 3.85160  | 0.27148  | -0.22396 | 0.00030  |
| C  | 3.81243   | 2.47139  | 0.18274  | 0.18581  | 0.00028  |
| C  | 4.95527   | 1.50986  | 0.21239  | 0.18881  | -0.00403 |
| C  | 6.32374   | 1.78510  | 0.32161  | -0.21093 | 0.00391  |
| C  | 7.20886   | 0.70022  | 0.32582  | -0.15505 | -0.00308 |
| C  | 6.74841   | -0.61861 | 0.22376  | -0.21644 | 0.00390  |
| C  | 5.36747   | -0.81917 | 0.11680  | 0.20596  | -0.00408 |
| C  | 4.62175   | -2.10793 | -0.00537 | 0.17119  | 0.00036  |
| C  | 5.24531   | -3.35338 | -0.02969 | -0.21743 | 0.00025  |
| C  | 4.46991   | -4.50951 | -0.14745 | -0.14798 | -0.00122 |
| C  | 3.08531   | -4.39136 | -0.23774 | -0.24117 | 0.00195  |
| C  | 2.52057   | -3.11616 | -0.20757 | 0.05654  | -0.00238 |
| H  | 0.52759   | 2.20952  | -0.07792 | 0.27341  | 0.00111  |
| H  | 0.68502   | 4.70284  | 0.07484  | 0.27137  | 0.00014  |
| H  | 2.95614   | 5.75414  | 0.30321  | 0.27246  | 0.00004  |
| H  | 4.96073   | 4.28409  | 0.36891  | 0.26396  | 0.00028  |
| H  | 6.70275   | 2.79730  | 0.40046  | 0.26716  | 0.00053  |
| H  | 8.27494   | 0.88513  | 0.40948  | 0.27588  | 0.00010  |
| H  | 7.45207   | -1.44280 | 0.22874  | 0.26698  | 0.00052  |
| H  | 6.32433   | -3.42659 | 0.04171  | 0.26521  | 0.00027  |
| H  | 4.94542   | -5.48470 | -0.16784 | 0.27422  | 0.00004  |
| H  | 2.44705   | -5.26278 | -0.33016 | 0.27322  | 0.00012  |
| H  | 1.44706   | -2.97317 | -0.27436 | 0.25348  | 0.00106  |

57

|                                             |           |                   |          |          |          |
|---------------------------------------------|-----------|-------------------|----------|----------|----------|
| [Cu <sup>II</sup> (tpy)(Trp)] <sup>2+</sup> | Cu-O=5.0  | E=-3068.848683570 |          |          |          |
| C                                           | -2.49949  | -0.64548          | -0.36729 | 0.80630  | 0.00144  |
| C                                           | -4.03734  | -0.80097          | -0.53000 | -0.17088 | 0.01542  |
| C                                           | -4.75094  | 0.47717           | -0.00587 | -0.49069 | -0.00367 |
| C                                           | -6.17971  | 0.59819           | -0.42765 | 0.00497  | 0.21507  |
| C                                           | -6.62379  | 1.00962           | -1.70675 | 0.05871  | 0.11811  |
| C                                           | -7.36192  | 0.34666           | 0.33442  | -0.12418 | -0.03981 |
| C                                           | -8.47980  | 0.60795           | -0.50546 | 0.14155  | 0.01159  |
| C                                           | -7.59436  | -0.05717          | 1.66875  | -0.12285 | 0.16579  |
| C                                           | -8.91064  | -0.19786          | 2.11218  | -0.24508 | -0.04624 |
| C                                           | -9.78966  | 0.47377           | -0.07939 | -0.19653 | 0.05666  |
| C                                           | -9.98974  | 0.06036           | 1.25486  | -0.15828 | 0.12276  |
| N                                           | -4.45518  | -2.07543          | 0.05236  | -0.92307 | 0.00913  |
| N                                           | -7.97147  | 1.00851           | -1.74601 | -0.50035 | 0.09889  |
| O                                           | -1.91538  | 0.40190           | -0.53520 | -0.59819 | 0.00895  |
| O                                           | -1.87179  | -1.79004          | -0.06990 | -0.71681 | 0.00294  |
| H                                           | -2.58767  | -2.46331          | 0.04373  | 0.53461  | -0.00013 |
| H                                           | -5.19473  | -2.53696          | -0.46603 | 0.42238  | -0.00016 |
| H                                           | -4.74183  | -1.99823          | 1.02462  | 0.40827  | -0.00013 |
| H                                           | -4.19095  | -0.87025          | -1.61432 | 0.26631  | -0.00066 |
| H                                           | -4.17473  | 1.33309           | -0.37423 | 0.29381  | 0.00703  |
| H                                           | -4.67846  | 0.49956           | 1.08731  | 0.25667  | 0.00087  |
| H                                           | -6.03889  | 1.31065           | -2.56578 | 0.26237  | -0.00370 |
| H                                           | -8.52870  | 1.28197           | -2.54561 | 0.46936  | -0.00288 |
| H                                           | -6.76784  | -0.24299          | 2.34759  | 0.24926  | -0.00482 |
| H                                           | -9.10403  | -0.50411          | 3.13445  | 0.26729  | 0.00117  |
| H                                           | -10.63432 | 0.67758           | -0.72981 | 0.26772  | -0.00158 |



| Electronic Supplementary Material            |         | D012BCCP |          |          |          |
|----------------------------------------------|---------|----------|----------|----------|----------|
| This journal is (c) The Owner Societies 2008 |         |          |          |          |          |
| N                                            | 3.46256 | 2.10921  | 0.02266  | -0.55436 | 0.02194  |
| N                                            | 5.04421 | 0.03813  | 0.09018  | -0.55813 | 0.05561  |
| N                                            | 3.28231 | -1.87458 | -0.10848 | -0.55664 | 0.02193  |
| C                                            | 2.59261 | 3.13143  | -0.02070 | 0.05676  | -0.00178 |
| C                                            | 2.99344 | 4.46575  | 0.04987  | -0.24171 | 0.00151  |
| C                                            | 4.35167 | 4.74769  | 0.17033  | -0.15053 | -0.00095 |
| C                                            | 5.26334 | 3.69035  | 0.21666  | -0.21907 | 0.00023  |
| C                                            | 4.79964 | 2.37860  | 0.14119  | 0.17055  | 0.00017  |
| C                                            | 5.70504 | 1.18925  | 0.18456  | 0.20651  | -0.00299 |
| C                                            | 7.09945 | 1.16180  | 0.30970  | -0.21709 | 0.00284  |
| C                                            | 7.72588 | -0.09047 | 0.32972  | -0.15807 | -0.00225 |
| C                                            | 6.98930 | -1.27741 | 0.22994  | -0.21746 | 0.00283  |
| C                                            | 5.59850 | -1.17157 | 0.10731  | 0.20080  | -0.00298 |
| C                                            | 4.58995 | -2.26941 | -0.01170 | 0.18526  | 0.00016  |
| C                                            | 4.93425 | -3.61934 | -0.02561 | -0.22498 | 0.00023  |
| C                                            | 3.93184 | -4.58528 | -0.14035 | -0.15102 | -0.00096 |
| C                                            | 2.60494 | -4.17561 | -0.23892 | -0.24292 | 0.00150  |
| C                                            | 2.32361 | -2.80916 | -0.21901 | 0.05553  | -0.00183 |
| H                                            | 1.54451 | 2.86694  | -0.11441 | 0.25237  | 0.00076  |
| H                                            | 2.25113 | 5.25483  | 0.01031  | 0.27282  | 0.00008  |
| H                                            | 4.70234 | 5.77298  | 0.22796  | 0.27265  | 0.00003  |
| H                                            | 6.32442 | 3.89028  | 0.31045  | 0.26356  | 0.00020  |
| H                                            | 7.69009 | 2.06685  | 0.39037  | 0.26542  | 0.00038  |
| H                                            | 8.80563 | -0.14243 | 0.42559  | 0.27435  | 0.00007  |
| H                                            | 7.49658 | -2.23487 | 0.24962  | 0.26525  | 0.00038  |
| H                                            | 5.97281 | -3.91983 | 0.05075  | 0.26353  | 0.00020  |
| H                                            | 4.18956 | -5.63931 | -0.15281 | 0.27214  | 0.00004  |
| H                                            | 1.79575 | -4.89116 | -0.33038 | 0.27101  | 0.00009  |
| H                                            | 1.30337 | -2.44733 | -0.29932 | 0.25643  | 0.00082  |

57

| [Cu <sup>II</sup> (tpy)(Trp)] <sup>2+</sup> |           | Cu-O=6.0 |          | E=-3068.848638850 |          |
|---------------------------------------------|-----------|----------|----------|-------------------|----------|
| C                                           | -3.14779  | -0.85616 | -0.27103 | 0.80828           | 0.00166  |
| C                                           | -4.68772  | -0.90723 | -0.49021 | -0.17015          | 0.01773  |
| C                                           | -5.34502  | 0.34492  | 0.16147  | -0.49326          | -0.00272 |
| C                                           | -6.73043  | 0.62444  | -0.31751 | 0.01665           | 0.22841  |
| C                                           | -7.06024  | 1.22957  | -1.55666 | 0.06490           | 0.13084  |
| C                                           | -7.97533  | 0.36145  | 0.33137  | -0.12609          | -0.04312 |
| C                                           | -9.01461  | 0.80737  | -0.53135 | 0.14212           | 0.01382  |
| C                                           | -8.32302  | -0.19770 | 1.58201  | -0.11771          | 0.17267  |
| C                                           | -9.67326  | -0.30499 | 1.92136  | -0.24482          | -0.04830 |
| C                                           | -10.35586 | 0.70849  | -0.20872 | -0.19601          | 0.05657  |
| C                                           | -10.67237 | 0.13733  | 1.04315  | -0.15534          | 0.12814  |
| N                                           | -5.19435  | -2.21036 | -0.07070 | -0.91957          | 0.01373  |
| N                                           | -8.39764  | 1.32959  | -1.67528 | -0.49813          | 0.10425  |
| O                                           | -2.51150  | 0.17339  | -0.29765 | -0.59373          | 0.01230  |
| O                                           | -2.58713  | -2.05681 | -0.09926 | -0.70715          | 0.00375  |
| H                                           | -3.32922  | -2.70748 | -0.09325 | 0.53394           | -0.00018 |
| H                                           | -5.95312  | -2.56214 | -0.64405 | 0.42126           | -0.00023 |
| H                                           | -5.47884  | -2.23975 | 0.90468  | 0.40765           | -0.00021 |
| H                                           | -4.80981  | -0.84419 | -1.57886 | 0.26512           | -0.00076 |
| H                                           | -4.68913  | 1.19401  | -0.06183 | 0.29619           | 0.00769  |
| H                                           | -5.33899  | 0.22037  | 1.24988  | 0.25760           | 0.00086  |
| H                                           | -6.39882  | 1.59563  | -2.33079 | 0.26369           | -0.00409 |
| H                                           | -8.88081  | 1.74289  | -2.46316 | 0.47008           | -0.00304 |
| H                                           | -7.55775  | -0.52783 | 2.27746  | 0.25111           | -0.00503 |
| H                                           | -9.95526  | -0.72938 | 2.87873  | 0.26820           | 0.00122  |
| H                                           | -11.13996 | 1.05314  | -0.87535 | 0.26822           | -0.00159 |
| H                                           | -11.71499 | 0.04677  | 1.32933  | 0.26820           | -0.00376 |
| Cu                                          | 3.48258   | 0.13127  | -0.03429 | 0.93203           | 0.14017  |
| N                                           | 3.87629   | 2.11781  | 0.05656  | -0.55446          | 0.01770  |
| N                                           | 5.48591   | 0.06373  | 0.06846  | -0.55608          | 0.04476  |
| N                                           | 3.74776   | -1.87733 | -0.08828 | -0.55422          | 0.01768  |
| C                                           | 2.99666   | 3.13269  | 0.04803  | 0.05574           | -0.00146 |
| C                                           | 3.38518   | 4.47060  | 0.11645  | -0.24275          | 0.00121  |
| C                                           | 4.74351   | 4.76574  | 0.19693  | -0.15167          | -0.00079 |
| C                                           | 5.66584   | 3.71717  | 0.20693  | -0.22537          | 0.00019  |
| C                                           | 5.21324   | 2.40092  | 0.13617  | 0.19073           | 0.00012  |
| C                                           | 6.13449   | 1.22268  | 0.14252  | 0.18579           | -0.00243 |
| C                                           | 7.53300   | 1.21546  | 0.21487  | -0.21303          | 0.00232  |
| C                                           | 8.17789   | -0.02740 | 0.20476  | -0.16277          | -0.00185 |
| C                                           | 7.45478   | -1.22388 | 0.12530  | -0.21826          | 0.00232  |
| C                                           | 6.05886   | -1.13668 | 0.05594  | 0.20036           | -0.00244 |

Electronic Supplementary Material for PCCP  
This journal is (c) The Owner Societies 2008

|   |         |          |          |          |          |
|---|---------|----------|----------|----------|----------|
| C | 4.44452 | -4.57792 | -0.14942 | -0.15202 | -0.00079 |
| C | 3.10803 | -4.19184 | -0.20309 | -0.24310 | 0.00121  |
| C | 2.80504 | -2.83049 | -0.16969 | 0.05572  | -0.00148 |
| H | 1.94842 | 2.86049  | -0.01563 | 0.24944  | 0.00062  |
| H | 2.63375 | 5.25193  | 0.10621  | 0.27196  | 0.00006  |
| H | 5.08582 | 5.79401  | 0.25161  | 0.27180  | 0.00002  |
| H | 6.72726 | 3.92701  | 0.26970  | 0.26278  | 0.00016  |
| H | 8.11354 | 2.12845  | 0.27710  | 0.26424  | 0.00030  |
| H | 9.26111 | -0.06420 | 0.25953  | 0.27592  | 0.00006  |
| H | 7.97599 | -2.17401 | 0.11899  | 0.26419  | 0.00030  |
| H | 6.47740 | -3.87553 | -0.02080 | 0.26273  | 0.00017  |
| H | 4.72084 | -5.62702 | -0.17319 | 0.27150  | 0.00003  |
| H | 2.30834 | -4.92072 | -0.26951 | 0.27134  | 0.00006  |
| H | 1.77564 | -2.49002 | -0.20901 | 0.25103  | 0.00063  |

57

|                                             |           |                   |          |          |          |
|---------------------------------------------|-----------|-------------------|----------|----------|----------|
| [Cu <sup>II</sup> (tpy)(Trp)] <sup>2+</sup> | Cu-O=7.0  | E=-3068.849264800 |          |          |          |
| C                                           | -3.75368  | -0.51129          | 0.86657  | 0.80699  | 0.00186  |
| C                                           | -5.29843  | -0.71450          | 0.84080  | -0.16932 | 0.01992  |
| C                                           | -5.91491  | 0.19507           | -0.26608 | -0.49481 | -0.00199 |
| C                                           | -7.29049  | -0.19963          | -0.68234 | 0.02300  | 0.23576  |
| C                                           | -7.60230  | -1.25553          | -1.57821 | 0.06952  | 0.13834  |
| C                                           | -8.54387  | 0.36272           | -0.29187 | -0.12729 | -0.04509 |
| C                                           | -9.56993  | -0.36610          | -0.95418 | 0.14269  | 0.01541  |
| C                                           | -8.90762  | 1.43705           | 0.55103  | -0.11614 | 0.17498  |
| C                                           | -10.26149 | 1.73747           | 0.71484  | -0.24472 | -0.04910 |
| C                                           | -10.91433 | -0.08001          | -0.80318 | -0.19607 | 0.05557  |
| C                                           | -11.24751 | 0.99333           | 0.05249  | -0.15422 | 0.13046  |
| N                                           | -5.83295  | -0.56542          | 2.18825  | -0.91614 | 0.01854  |
| N                                           | -8.93621  | -1.34759          | -1.72908 | -0.49711 | 0.10715  |
| O                                           | -3.09919  | -0.33131          | -0.13574 | -0.58914 | 0.01578  |
| O                                           | -3.21538  | -0.60010          | 2.08413  | -0.69901 | 0.00451  |
| H                                           | -3.96331  | -0.72457          | 2.71359  | 0.53367  | -0.00023 |
| H                                           | -6.61049  | -1.18095          | 2.39877  | 0.42093  | -0.00031 |
| H                                           | -6.09046  | 0.38908           | 2.42329  | 0.40717  | -0.00028 |
| H                                           | -5.43151  | -1.76425          | 0.55084  | 0.26494  | -0.00085 |
| H                                           | -5.23178  | 0.14746           | -1.12171 | 0.29765  | 0.00759  |
| H                                           | -5.90841  | 1.23191           | 0.08760  | 0.25797  | 0.00117  |
| H                                           | -6.92853  | -1.91524          | -2.10897 | 0.26498  | -0.00432 |
| H                                           | -9.40744  | -2.01057          | -2.33201 | 0.47052  | -0.00314 |
| H                                           | -8.15138  | 2.03094           | 1.05442  | 0.25134  | -0.00510 |
| H                                           | -10.55617 | 2.56070           | 1.35653  | 0.26841  | 0.00125  |
| H                                           | -11.68881 | -0.64304          | -1.31426 | 0.26852  | -0.00156 |
| H                                           | -12.29313 | 1.24712           | 0.19205  | 0.26836  | -0.00384 |
| Cu                                          | 3.89211   | 0.01514           | -0.09456 | 0.91461  | 0.11999  |
| N                                           | 4.13020   | 2.03131           | -0.14593 | -0.55261 | 0.01517  |
| N                                           | 5.90144   | 0.11471           | -0.08273 | -0.55680 | 0.03810  |
| N                                           | 4.32588   | -1.96765          | -0.04256 | -0.55318 | 0.01516  |
| C                                           | 3.17268   | 2.97258           | -0.17455 | 0.05537  | -0.00129 |
| C                                           | 3.45384   | 4.33868           | -0.20643 | -0.24347 | 0.00104  |
| C                                           | 4.78593   | 4.74342           | -0.20797 | -0.15276 | -0.00069 |
| C                                           | 5.78910   | 3.77247           | -0.17760 | -0.22614 | 0.00018  |
| C                                           | 5.44173   | 2.42272           | -0.14695 | 0.18618  | 0.00009  |
| C                                           | 6.45551   | 1.32342           | -0.11329 | 0.20003  | -0.00210 |
| C                                           | 7.85162   | 1.43211           | -0.11210 | -0.21875 | 0.00198  |
| C                                           | 8.59579   | 0.24648           | -0.07923 | -0.16384 | -0.00159 |
| C                                           | 7.97096   | -1.00612          | -0.04942 | -0.21367 | 0.00198  |
| C                                           | 6.57090   | -1.03408          | -0.05258 | 0.18542  | -0.00209 |
| C                                           | 5.66944   | -2.22786          | -0.02681 | 0.19116  | 0.00008  |
| C                                           | 6.14780   | -3.53673          | 0.01156  | -0.22603 | 0.00018  |
| C                                           | 5.24495   | -4.60179          | 0.03467  | -0.15268 | -0.00069 |
| C                                           | 3.87934   | -4.33009          | 0.01937  | -0.24350 | 0.00104  |
| C                                           | 3.46518   | -2.99879          | -0.01922 | 0.05521  | -0.00128 |
| H                                           | 2.14832   | 2.61615           | -0.17118 | 0.24812  | 0.00054  |
| H                                           | 2.64189   | 5.05667           | -0.22908 | 0.27124  | 0.00006  |
| H                                           | 5.04626   | 5.79667           | -0.23192 | 0.27115  | 0.00002  |
| H                                           | 6.83175   | 4.06853           | -0.17751 | 0.26227  | 0.00015  |
| H                                           | 8.35746   | 2.39024           | -0.13632 | 0.26352  | 0.00026  |
| H                                           | 9.67968   | 0.29961           | -0.07777 | 0.27519  | 0.00006  |
| H                                           | 8.56767   | -1.91044          | -0.02552 | 0.26349  | 0.00025  |
| H                                           | 7.21449   | -3.72774          | 0.02381  | 0.26221  | 0.00014  |
| H                                           | 5.60747   | -5.62418          | 0.06468  | 0.27117  | 0.00003  |
| H                                           | 3.14176   | -5.12434          | 0.03675  | 0.27124  | 0.00006  |

|                                             | 21108     | PCCP              | -2.74509 | -0.03252 | 0.24825  | 0.00053 |
|---------------------------------------------|-----------|-------------------|----------|----------|----------|---------|
| [Cu <sup>II</sup> (tpy)(Trp)] <sup>2+</sup> | Cu-O=8.0  | E=-3068.850471460 |          |          |          |         |
| C                                           | -4.34097  | -0.48151          | 0.90577  | 0.80681  | 0.00192  |         |
| C                                           | -5.88607  | -0.68700          | 0.87754  | -0.16910 | 0.02124  |         |
| C                                           | -6.49577  | 0.21145           | -0.24307 | -0.49596 | -0.00133 |         |
| C                                           | -7.85875  | -0.20298          | -0.67700 | 0.02724  | 0.24086  |         |
| C                                           | -8.13975  | -1.26629          | -1.57609 | 0.07215  | 0.14345  |         |
| C                                           | -9.12726  | 0.33825           | -0.30645 | -0.12819 | -0.04645 |         |
| C                                           | -10.13052 | -0.40891          | -0.98303 | 0.14306  | 0.01646  |         |
| C                                           | -9.52209  | 1.40679           | 0.52935  | -0.11471 | 0.17673  |         |
| C                                           | -10.88366 | 1.68372           | 0.67191  | -0.24449 | -0.04956 |         |
| C                                           | -11.48144 | -0.14630          | -0.85342 | -0.19631 | 0.05487  |         |
| C                                           | -11.84622 | 0.92201           | -0.00449 | -0.15364 | 0.13170  |         |
| N                                           | -6.42803  | -0.52538          | 2.21922  | -0.91417 | 0.02151  |         |
| N                                           | -9.46849  | -1.38083          | -1.74686 | -0.49628 | 0.10898  |         |
| O                                           | -3.68744  | -0.30252          | -0.09659 | -0.58403 | 0.01843  |         |
| O                                           | -3.80426  | -0.56745          | 2.12409  | -0.69635 | 0.00506  |         |
| H                                           | -4.55057  | -0.69070          | 2.75455  | 0.53322  | -0.00026 |         |
| H                                           | -7.20971  | -1.13476          | 2.43181  | 0.42067  | -0.00034 |         |
| H                                           | -6.67684  | 0.43251           | 2.44947  | 0.40735  | -0.00034 |         |
| H                                           | -6.01614  | -1.73978          | 0.59723  | 0.26496  | -0.00090 |         |
| H                                           | -5.79873  | 0.16500           | -1.08769 | 0.29893  | 0.00779  |         |
| H                                           | -6.50486  | 1.25014           | 0.10491  | 0.25875  | 0.00117  |         |
| H                                           | -7.44673  | -1.91536          | -2.09516 | 0.26572  | -0.00448 |         |
| H                                           | -9.91922  | -2.05268          | -2.35583 | 0.47079  | -0.00319 |         |
| H                                           | -8.78387  | 2.01372           | 1.04374  | 0.25205  | -0.00515 |         |
| H                                           | -11.20246 | 2.50225           | 1.30792  | 0.26859  | 0.00126  |         |
| H                                           | -12.23810 | -0.72331          | -1.37543 | 0.26859  | -0.00155 |         |
| H                                           | -12.89817 | 1.15755           | 0.11851  | 0.26841  | -0.00387 |         |
| Cu                                          | 4.30830   | -0.04190          | -0.11143 | 0.90258  | 0.10632  |         |
| N                                           | 4.45098   | 1.98470           | -0.16039 | -0.55179 | 0.01347  |         |
| N                                           | 6.31460   | 0.15600           | -0.07808 | -0.55696 | 0.03362  |         |
| N                                           | 4.84235   | -2.00172          | -0.05153 | -0.55233 | 0.01347  |         |
| C                                           | 3.45015   | 2.87918           | -0.20374 | 0.05503  | -0.00115 |         |
| C                                           | 3.66592   | 4.25690           | -0.23455 | -0.24394 | 0.00092  |         |
| C                                           | 4.97711   | 4.72495           | -0.21961 | -0.15351 | -0.00062 |         |
| C                                           | 6.02489   | 3.80316           | -0.17493 | -0.22673 | 0.00017  |         |
| C                                           | 5.74212   | 2.43845           | -0.14616 | 0.18648  | 0.00007  |         |
| C                                           | 6.80865   | 1.39013           | -0.09872 | 0.19981  | -0.00187 |         |
| C                                           | 8.19765   | 1.56834           | -0.07486 | -0.21932 | 0.00176  |         |
| C                                           | 8.99891   | 0.42093           | -0.02943 | -0.16477 | -0.00141 |         |
| C                                           | 8.43612   | -0.86108          | -0.00827 | -0.21407 | 0.00175  |         |
| C                                           | 7.03915   | -0.95792          | -0.03457 | 0.18530  | -0.00186 |         |
| C                                           | 6.19700   | -2.19456          | -0.01953 | 0.19111  | 0.00007  |         |
| C                                           | 6.73991   | -3.47774          | 0.02472  | -0.22646 | 0.00016  |         |
| C                                           | 5.89168   | -4.58680          | 0.03689  | -0.15333 | -0.00062 |         |
| C                                           | 4.51461   | -4.38397          | 0.00419  | -0.24367 | 0.00092  |         |
| C                                           | 4.03497   | -3.07494          | -0.03970 | 0.05501  | -0.00115 |         |
| H                                           | 2.44390   | 2.47409           | -0.21454 | 0.24765  | 0.00048  |         |
| H                                           | 2.82081   | 4.93501           | -0.26937 | 0.27084  | 0.00005  |         |
| H                                           | 5.18708   | 5.78932           | -0.24242 | 0.27058  | 0.00002  |         |
| H                                           | 7.05221   | 4.14818           | -0.16285 | 0.26177  | 0.00013  |         |
| H                                           | 8.65545   | 2.55046           | -0.09035 | 0.26293  | 0.00023  |         |
| H                                           | 10.07873  | 0.52740           | -0.01009 | 0.27464  | 0.00006  |         |
| H                                           | 9.07642   | -1.73469          | 0.02735  | 0.26299  | 0.00022  |         |
| H                                           | 7.81467   | -3.61501          | 0.04947  | 0.26179  | 0.00013  |         |
| H                                           | 6.30461   | -5.58969          | 0.07131  | 0.27078  | 0.00002  |         |
| H                                           | 3.81755   | -5.21423          | 0.01204  | 0.27117  | 0.00005  |         |
| H                                           | 2.96904   | -2.87528          | -0.06618 | 0.24744  | 0.00048  |         |

57

|                                             | 57        | PCCP              | -2.74509 | -0.03252 | 0.24825  | 0.00053 |
|---------------------------------------------|-----------|-------------------|----------|----------|----------|---------|
| [Cu <sup>II</sup> (tpy)(Trp)] <sup>2+</sup> | Cu-O=9.0  | E=-3068.851703610 |          |          |          |         |
| C                                           | -4.92338  | -0.24451          | 0.98365  | 0.80661  | 0.00185  |         |
| C                                           | -6.46952  | -0.44636          | 1.01002  | -0.16882 | 0.02197  |         |
| C                                           | -7.08153  | 0.18318           | -0.28068 | -0.49679 | -0.00059 |         |
| C                                           | -8.43768  | -0.32856          | -0.61868 | 0.03043  | 0.24431  |         |
| C                                           | -8.70494  | -1.57615          | -1.24515 | 0.07379  | 0.14772  |         |
| C                                           | -9.71210  | 0.27725           | -0.40000 | -0.12870 | -0.04742 |         |
| C                                           | -10.70500 | -0.61432          | -0.89148 | 0.14336  | 0.01722  |         |
| C                                           | -10.11955 | 1.51061           | 0.15578  | -0.11348 | 0.17794  |         |
| C                                           | -11.48362 | 1.80529           | 0.21490  | -0.24434 | -0.04986 |         |
| C                                           | -12.05799 | -0.33670          | -0.84140 | -0.19659 | 0.05435  |         |
| C                                           | -12.43577 | 0.89969           | -0.27217 | -0.15318 | 0.13256  |         |
| N                                           | -7.00485  | 0.00999           | 2.28387  | -0.91282 | 0.02340  |         |

| Electronic Supplementary Material | 10.1007/978-3-319-2008-2 | CCP      | -1.73519 | -1.39803 | -0.49571 | 0.11039  |
|-----------------------------------|--------------------------|----------|----------|----------|----------|----------|
| O                                 | -4.37752                 | -0.06908 | -0.28804 | -0.03853 | -0.57997 | 0.02075  |
| H                                 | -5.11709                 | -0.05097 | 2.18801  | 2.83699  | -0.69441 | 0.00545  |
| H                                 | -7.79024                 | -0.53072 | 2.62770  | 2.83699  | 0.53296  | -0.00030 |
| H                                 | -7.24295                 | 0.99765  | 2.30056  | 2.62770  | 0.42032  | -0.00036 |
| H                                 | -6.60192                 | -1.53483 | 0.97109  | 2.30056  | 0.40761  | -0.00037 |
| H                                 | -6.37910                 | -0.03979 | -1.09244 | 0.97109  | 0.26469  | -0.00093 |
| H                                 | -7.10101                 | 1.27224  | -0.16647 | -1.09244 | 0.30047  | 0.00833  |
| H                                 | -8.00364                 | -2.32507 | -1.58920 | -0.16647 | 0.25901  | 0.00095  |
| H                                 | -10.47232                | -2.53459 | -1.83559 | -1.58920 | 0.26619  | -0.00462 |
| H                                 | -9.38932                 | 2.22617  | 0.52012  | -1.83559 | 0.47095  | -0.00324 |
| H                                 | -11.81242                | 2.74886  | 0.63645  | 0.52012  | 0.25286  | -0.00519 |
| H                                 | -12.80681                | -1.02478 | -1.22056 | 0.63645  | 0.26871  | 0.00127  |
| H                                 | -13.48985                | 1.15130  | -0.21888 | -1.22056 | 0.26861  | -0.00153 |
| Cu                                | 4.71806                  | -0.04171 | -0.10926 | -0.21888 | 0.26839  | -0.00390 |
| N                                 | 4.91686                  | 1.98099  | -0.18272 | -0.10926 | 0.89398  | 0.09607  |
| N                                 | 6.73172                  | 0.10393  | -0.08491 | -0.18272 | -0.55114 | 0.01220  |
| N                                 | 5.20335                  | -2.01469 | -0.02788 | -0.08491 | -0.55710 | 0.03026  |
| C                                 | 3.94073                  | 2.90202  | -0.23254 | -0.02788 | -0.55166 | 0.01219  |
| C                                 | 4.19331                  | 4.27302  | -0.28028 | -0.23254 | 0.05484  | -0.00106 |
| C                                 | 5.51669                  | 4.70541  | -0.27588 | -0.28028 | -0.24415 | 0.00084  |
| C                                 | 6.53915                  | 3.75603  | -0.22444 | -0.27588 | -0.15407 | -0.00057 |
| C                                 | 6.21981                  | 2.39984  | -0.17876 | -0.22444 | -0.22712 | 0.00016  |
| C                                 | 7.25836                  | 1.32394  | -0.12315 | -0.17876 | 0.18647  | 0.00005  |
| C                                 | 8.65173                  | 1.46552  | -0.10807 | -0.12315 | 0.19973  | -0.00169 |
| C                                 | 9.42255                  | 0.29791  | -0.05238 | -0.10807 | -0.21971 | 0.00158  |
| C                                 | 8.82609                  | -0.96829 | -0.01297 | -0.05238 | -0.16548 | -0.00128 |
| C                                 | 7.42684                  | -1.02798 | -0.03146 | -0.01297 | -0.21453 | 0.00158  |
| C                                 | 6.55258                  | -2.24201 | 0.00207  | -0.03146 | 0.18514  | -0.00168 |
| C                                 | 7.06261                  | -3.53814 | 0.06068  | 0.00207  | 0.19124  | 0.00006  |
| C                                 | 6.18640                  | -4.62484 | 0.08942  | 0.06068  | -0.22690 | 0.00016  |
| C                                 | 4.81488                  | -4.38710 | 0.05847  | 0.08942  | -0.15397 | -0.00057 |
| C                                 | 4.36901                  | -3.06679 | -0.00018 | 0.05847  | -0.24403 | 0.00083  |
| H                                 | 2.92369                  | 2.52472  | -0.23399 | -0.00018 | 0.05478  | -0.00106 |
| H                                 | 3.36663                  | 4.97326  | -0.31961 | -0.23399 | 0.24720  | 0.00044  |
| H                                 | 5.75544                  | 5.76333  | -0.31186 | -0.31961 | 0.27072  | 0.00004  |
| H                                 | 7.57542                  | 4.07345  | -0.22008 | -0.31186 | 0.27024  | 0.00002  |
| H                                 | 9.13561                  | 2.43474  | -0.13799 | -0.22008 | 0.26142  | 0.00012  |
| H                                 | 10.50489                 | 0.37596  | -0.03951 | -0.13799 | 0.26253  | 0.00019  |
| H                                 | 9.44315                  | -1.85815 | 0.03008  | -0.03951 | 0.27417  | 0.00005  |
| H                                 | 8.13359                  | -3.70245 | 0.08389  | 0.03008  | 0.26255  | 0.00020  |
| H                                 | 6.57363                  | -5.63749 | 0.13510  | 0.08389  | 0.26142  | 0.00012  |
| H                                 | 4.09672                  | -5.19897 | 0.07875  | 0.13510  | 0.27036  | 0.00002  |
| H                                 | 3.30847                  | -2.84024 | -0.02607 | 0.07875  | 0.27088  | 0.00004  |
| H                                 |                          |          |          | -0.02607 | 0.24712  | 0.00044  |

57

| [Cu <sup>II</sup> (tpy)(Trp)] <sup>2+</sup> | 57        | Cu-O=10.0 | E=-3068.852948860 |          |          |  |
|---------------------------------------------|-----------|-----------|-------------------|----------|----------|--|
| C                                           | -5.52088  | -0.48095  | 0.94745           | 0.80654  | 0.00196  |  |
| C                                           | -7.07123  | -0.65395  | 0.91736           | -0.16859 | 0.02313  |  |
| C                                           | -7.65168  | 0.23318   | -0.22973          | -0.49726 | -0.00029 |  |
| C                                           | -9.00740  | -0.17800  | -0.68317          | 0.03230  | 0.24668  |  |
| C                                           | -9.27642  | -1.25089  | -1.57661          | 0.07555  | 0.15003  |  |
| C                                           | -10.28048 | 0.37121   | -0.34126          | -0.12919 | -0.04807 |  |
| C                                           | -11.27401 | -0.37938  | -1.02798          | 0.14358  | 0.01777  |  |
| C                                           | -10.68572 | 1.44901   | 0.47698           | -0.11339 | 0.17805  |  |
| C                                           | -12.04880 | 1.73185   | 0.59255           | -0.24425 | -0.04985 |  |
| C                                           | -12.62582 | -0.11123  | -0.92533          | -0.19684 | 0.05374  |  |
| C                                           | -13.00167 | 0.96685   | -0.09349          | -0.15323 | 0.13271  |  |
| N                                           | -7.61774  | -0.44952  | 2.24934           | -0.91125 | 0.02610  |  |
| N                                           | -10.60145 | -1.36193  | -1.77013          | -0.49545 | 0.11125  |  |
| O                                           | -4.86420  | -0.33129  | -0.05682          | -0.57699 | 0.02265  |  |
| O                                           | -4.98861  | -0.56049  | 2.16761           | -0.69257 | 0.00587  |  |
| H                                           | -5.73547  | -0.65787  | 2.80047           | 0.53264  | -0.00032 |  |
| H                                           | -8.41663  | -1.03206  | 2.47228           | 0.42045  | -0.00040 |  |
| H                                           | -7.83435  | 0.51971   | 2.46360           | 0.40770  | -0.00042 |  |
| H                                           | -7.22232  | -1.70982  | 0.66039           | 0.26511  | -0.00099 |  |
| H                                           | -6.93741  | 0.16475   | -1.05859          | 0.30069  | 0.00801  |  |
| H                                           | -7.65766  | 1.27710   | 0.10186           | 0.25959  | 0.00120  |  |
| H                                           | -8.57589  | -1.90761  | -2.07577          | 0.26682  | -0.00469 |  |
| H                                           | -11.04366 | -2.03841  | -2.38035          | 0.47107  | -0.00327 |  |
| H                                           | -9.95422  | 2.05786   | 0.99857           | 0.25281  | -0.00520 |  |
| H                                           | -12.37600 | 2.55759   | 1.21484           | 0.26870  | 0.00127  |  |
| H                                           | -13.37516 | -0.69084  | -1.45493          | 0.26861  | -0.00151 |  |
| H                                           | -14.05480 | 1.20719   | 0.00837           | 0.26835  | -0.00391 |  |

Electronic Supplementary Material for PCCP  
This journal is (c) The Owner Societies 2008

|   |          |          |          |          |          |
|---|----------|----------|----------|----------|----------|
| N | 7.14741  | 0.11116  | -0.07033 | -0.55744 | 0.02790  |
| N | 5.60007  | -1.99491 | -0.04617 | -0.55097 | 0.01129  |
| C | 4.38269  | 2.93704  | -0.19161 | 0.05489  | -0.00099 |
| C | 4.64813  | 4.30613  | -0.22120 | -0.24430 | 0.00078  |
| C | 5.97547  | 4.72591  | -0.20690 | -0.15466 | -0.00053 |
| C | 6.98870  | 3.76631  | -0.16388 | -0.22180 | 0.00015  |
| C | 6.65653  | 2.41267  | -0.13618 | 0.17210  | 0.00005  |
| C | 7.68514  | 1.32663  | -0.09032 | 0.20507  | -0.00156 |
| C | 9.07966  | 1.45560  | -0.06740 | -0.21980 | 0.00146  |
| C | 9.83980  | 0.28052  | -0.02376 | -0.16324 | -0.00118 |
| C | 9.23190  | -0.98066 | -0.00346 | -0.21481 | 0.00146  |
| C | 7.83221  | -1.02738 | -0.02867 | 0.18528  | -0.00155 |
| C | 6.94714  | -2.23412 | -0.01451 | 0.19122  | 0.00004  |
| C | 7.44605  | -3.53525 | 0.02850  | -0.22720 | 0.00015  |
| C | 6.56071  | -4.61480 | 0.03958  | -0.15439 | -0.00053 |
| C | 5.19136  | -4.36504 | 0.00705  | -0.24418 | 0.00078  |
| C | 4.75697  | -3.04030 | -0.03544 | 0.05473  | -0.00099 |
| H | 3.36214  | 2.56952  | -0.20159 | 0.24699  | 0.00041  |
| H | 3.82815  | 5.01452  | -0.25454 | 0.27061  | 0.00004  |
| H | 6.22430  | 5.78190  | -0.22884 | 0.26995  | 0.00002  |
| H | 8.02787  | 4.07392  | -0.15225 | 0.26114  | 0.00011  |
| H | 9.57241  | 2.42070  | -0.08235 | 0.26223  | 0.00019  |
| H | 10.92274 | 0.34870  | -0.00522 | 0.27127  | 0.00005  |
| H | 9.84084  | -1.87649 | 0.03066  | 0.26222  | 0.00018  |
| H | 8.51553  | -3.70884 | 0.05324  | 0.26112  | 0.00011  |
| H | 6.93923  | -5.63122 | 0.07299  | 0.27006  | 0.00002  |
| H | 4.46626  | -5.17095 | 0.01397  | 0.27075  | 0.00004  |
| H | 3.69846  | -2.80460 | -0.06211 | 0.24699  | 0.00041  |

Optimized geometries of the potential energy scan for  $[\text{Cu}^{\text{II}}(\text{tpy})(\text{Phe})]^{2+}$  as shown in Figure S1b

53

| $[\text{Cu}^{\text{II}}(\text{tpy})(\text{Phe})]^{2+}$ | Cu-O=3.0 | E=-2937.264102290 |          |          |          |
|--------------------------------------------------------|----------|-------------------|----------|----------|----------|
| C                                                      | -2.08879 | -0.86023          | -0.54383 | 0.85394  | -0.00198 |
| C                                                      | -3.61436 | -0.69907          | -0.70125 | -0.17748 | 0.00611  |
| C                                                      | -4.20399 | -0.06122          | 0.58621  | -0.46190 | -0.00028 |
| C                                                      | -5.69685 | 0.16754           | 0.49517  | -0.05685 | 0.02905  |
| C                                                      | -6.21583 | 1.17754           | -0.33692 | -0.22479 | 0.01641  |
| C                                                      | -6.58907 | -0.62803          | 1.22962  | -0.24333 | -0.00411 |
| C                                                      | -7.96823 | -0.42749          | 1.13085  | -0.20457 | 0.01513  |
| C                                                      | -7.59118 | 1.38086           | -0.43611 | -0.21667 | -0.00597 |
| C                                                      | -8.47231 | 0.57581           | 0.29528  | -0.19682 | 0.03420  |
| N                                                      | -4.15206 | -2.04107          | -0.98193 | -0.92805 | 0.00137  |
| O                                                      | -1.31129 | 0.08141           | -0.41167 | -0.68728 | 0.03020  |
| O                                                      | -1.69066 | -2.12084          | -0.54796 | -0.72828 | 0.00236  |
| H                                                      | -2.56584 | -2.62236          | -0.70424 | 0.54036  | -0.00015 |
| H                                                      | -4.47406 | -2.13882          | -1.94101 | 0.42956  | -0.00003 |
| H                                                      | -4.93632 | -2.27393          | -0.37720 | 0.43043  | 0.00038  |
| H                                                      | -3.77946 | -0.01650          | -1.54206 | 0.27012  | -0.00014 |
| H                                                      | -3.67542 | 0.88290           | 0.75518  | 0.26570  | 0.00120  |
| H                                                      | -3.97746 | -0.71254          | 1.43911  | 0.24970  | -0.00004 |
| H                                                      | -5.53911 | 1.81664           | -0.90006 | 0.23525  | -0.00049 |
| H                                                      | -6.20642 | -1.39358          | 1.90101  | 0.24141  | 0.00005  |
| H                                                      | -8.64745 | -1.04545          | 1.70964  | 0.25699  | -0.00043 |
| H                                                      | -7.97798 | 2.16811           | -1.07553 | 0.25564  | 0.00012  |
| H                                                      | -9.54339 | 0.73446           | 0.22137  | 0.25837  | -0.00093 |
| Cu                                                     | 1.67093  | -0.00823          | -0.09810 | 1.27376  | 0.52358  |
| N                                                      | 1.57328  | 1.96691           | -0.11295 | -0.57060 | 0.08318  |
| N                                                      | 3.55233  | 0.34197           | 0.11068  | -0.53387 | 0.19277  |
| N                                                      | 2.27780  | -1.89154          | -0.02897 | -0.57824 | 0.07624  |
| C                                                      | 0.46621  | 2.71694           | -0.23654 | 0.06886  | -0.00518 |
| C                                                      | 0.52457  | 4.11238           | -0.23504 | -0.22960 | 0.00570  |
| C                                                      | 1.76230  | 4.73542           | -0.10123 | -0.14744 | -0.00290 |
| C                                                      | 2.91494  | 3.95203           | 0.02831  | -0.18540 | 0.00053  |
| C                                                      | 2.79793  | 2.56702           | 0.01974  | 0.15665  | 0.00094  |
| C                                                      | 3.93810  | 1.62471           | 0.14875  | 0.18156  | -0.00876 |
| C                                                      | 5.29863  | 1.90751           | 0.29814  | -0.14863 | 0.00908  |
| C                                                      | 6.18803  | 0.83107           | 0.40174  | -0.16077 | -0.00698 |
| C                                                      | 5.73756  | -0.49394          | 0.35735  | -0.20763 | 0.00916  |
| C                                                      | 4.36631  | -0.71772          | 0.20525  | 0.19818  | -0.00890 |
| C                                                      | 3.63518  | -2.00772          | 0.12722  | 0.14149  | 0.00115  |
| C                                                      | 4.24027  | -3.25696          | 0.20120  | -0.12401 | 0.00026  |
| C                                                      | 3.44831  | -4.40743          | 0.11436  | -0.16769 | -0.00262 |

|                                              |          |          |          |          |          |          |
|----------------------------------------------|----------|----------|----------|----------|----------|----------|
| Electronic Supplementary Material            | 217162   | PCCP     | -4.27644 | -0.04530 | -0.22952 | 0.00510  |
| This journal is (c) The Owner Societies 2008 | 217162   | PCCP     | -2.99658 | -0.11381 | 0.06388  | -0.00512 |
| H                                            | -0.46884 | 2.17519  | -0.33698 | 0.27971  | 0.00230  | 0.00230  |
| H                                            | -0.38943 | 4.68634  | -0.33732 | 0.28186  | 0.00038  | 0.00038  |
| H                                            | 1.83860  | 5.81795  | -0.09653 | 0.28505  | 0.00011  | 0.00011  |
| H                                            | 3.88615  | 4.42172  | 0.13419  | 0.27301  | 0.00073  | 0.00073  |
| H                                            | 5.66546  | 2.92660  | 0.33381  | 0.27020  | 0.00144  | 0.00144  |
| H                                            | 7.24893  | 1.02781  | 0.51874  | 0.28430  | 0.00020  | 0.00020  |
| H                                            | 6.44095  | -1.31424 | 0.43911  | 0.27852  | 0.00142  | 0.00142  |
| H                                            | 5.31390  | -3.34102 | 0.32455  | 0.26305  | 0.00066  | 0.00066  |
| H                                            | 3.90801  | -5.38884 | 0.17096  | 0.28064  | 0.00010  | 0.00010  |
| H                                            | 1.42497  | -5.14346 | -0.11760 | 0.28257  | 0.00040  | 0.00040  |
| H                                            | 0.45052  | -2.84258 | -0.24025 | 0.27491  | 0.00243  | 0.00243  |

53

|                                              |          |                   |          |          |          |          |
|----------------------------------------------|----------|-------------------|----------|----------|----------|----------|
| [Cu <sup>II</sup> (tpy)(Phe)] <sup>*2+</sup> | Cu-O=4.0 | E=-2937.252846480 |          |          |          |          |
| C                                            | 2.17573  | -0.61367          | -0.42795 | 0.82193  | -0.00022 | -0.00022 |
| C                                            | 3.61918  | -0.11503          | -0.60571 | -0.17316 | 0.00600  | 0.00600  |
| C                                            | 4.47454  | -0.55342          | 0.60896  | -0.46855 | -0.00135 | -0.00135 |
| C                                            | 5.94260  | -0.23161          | 0.44140  | -0.03009 | 0.06405  | 0.06405  |
| C                                            | 6.72729  | -0.95876          | -0.47773 | -0.21741 | 0.02329  | 0.02329  |
| C                                            | 6.55568  | 0.77426           | 1.20535  | -0.24116 | -0.00365 | -0.00365 |
| C                                            | 7.91357  | 1.04795           | 1.06082  | -0.20251 | 0.02111  | 0.02111  |
| C                                            | 8.08221  | -0.68886          | -0.62617 | -0.21605 | -0.00680 | -0.00680 |
| C                                            | 8.68139  | 0.31870           | 0.14101  | -0.17528 | 0.07206  | 0.07206  |
| N                                            | 3.56318  | 1.35627           | -0.78946 | -0.93438 | 0.00022  | 0.00022  |
| O                                            | 1.88283  | -1.78389          | -0.32303 | -0.60435 | 0.00194  | 0.00194  |
| O                                            | 1.27073  | 0.40090           | -0.36384 | -0.78219 | 0.00784  | 0.00784  |
| H                                            | 1.87280  | 1.20934           | -0.50296 | 0.52835  | -0.00015 | -0.00015 |
| H                                            | 3.85979  | 1.63900           | -1.71957 | 0.42911  | 0.00006  | 0.00006  |
| H                                            | 4.16065  | 1.84312           | -0.12555 | 0.42500  | 0.00000  | 0.00000  |
| H                                            | 4.00219  | -0.59861          | -1.50996 | 0.27619  | -0.00015 | -0.00015 |
| H                                            | 4.32764  | -1.62962          | 0.74386  | 0.28174  | 0.00226  | 0.00226  |
| H                                            | 4.08399  | -0.06383          | 1.50946  | 0.24762  | 0.00003  | 0.00003  |
| H                                            | 6.27487  | -1.75824          | -1.05862 | 0.24339  | -0.00073 | -0.00073 |
| H                                            | 5.97154  | 1.33206           | 1.93268  | 0.24077  | -0.00001 | -0.00001 |
| H                                            | 8.37856  | 1.82001           | 1.66392  | 0.25800  | -0.00062 | -0.00062 |
| H                                            | 8.67682  | -1.26466          | -1.32683 | 0.25959  | 0.00011  | 0.00011  |
| H                                            | 9.73957  | 0.52830           | 0.03185  | 0.25933  | -0.00197 | -0.00197 |
| Cu                                           | -1.67409 | 0.02998           | -0.08176 | 1.24735  | 0.49049  | 0.49049  |
| N                                            | -1.93592 | -1.95043          | -0.02567 | -0.57701 | 0.07498  | 0.07498  |
| N                                            | -3.60803 | 0.03354           | 0.06307  | -0.53302 | 0.18012  | 0.18012  |
| N                                            | -1.95712 | 2.01169           | -0.09819 | -0.57174 | 0.06872  | 0.06872  |
| C                                            | -1.00279 | -2.91658          | -0.08007 | 0.06585  | -0.00487 | -0.00487 |
| C                                            | -1.34529 | -4.27330          | -0.01755 | -0.22702 | 0.00522  | 0.00522  |
| C                                            | -2.68304 | -4.63167          | 0.09881  | -0.13785 | -0.00249 | -0.00249 |
| C                                            | -3.65400 | -3.62400          | 0.14977  | -0.21283 | 0.00029  | 0.00029  |
| C                                            | -3.26206 | -2.29289          | 0.08808  | 0.17362  | 0.00100  | 0.00100  |
| C                                            | -4.21408 | -1.15828          | 0.14235  | 0.19490  | -0.00846 | -0.00846 |
| C                                            | -5.60917 | -1.18989          | 0.26788  | -0.20404 | 0.00891  | 0.00891  |
| C                                            | -6.29761 | 0.02869           | 0.31254  | -0.16236 | -0.00652 | -0.00652 |
| C                                            | -5.61584 | 1.25190           | 0.23772  | -0.14953 | 0.00859  | 0.00859  |
| C                                            | -4.22398 | 1.22290           | 0.11048  | 0.16905  | -0.00811 | -0.00811 |
| C                                            | -3.27632 | 2.36073           | 0.01708  | 0.17492  | 0.00095  | 0.00095  |
| C                                            | -3.65961 | 3.69860           | 0.04100  | -0.18824 | 0.00040  | 0.00040  |
| C                                            | -2.68275 | 4.69450           | -0.05677 | -0.14662 | -0.00246 | -0.00246 |
| C                                            | -1.34440 | 4.32677           | -0.18222 | -0.23131 | 0.00444  | 0.00444  |
| C                                            | -1.02311 | 2.96935           | -0.20085 | 0.06574  | -0.00465 | -0.00465 |
| H                                            | 0.03677  | -2.60848          | -0.18689 | 0.28516  | 0.00233  | 0.00233  |
| H                                            | -0.55814 | -5.01784          | -0.06429 | 0.28291  | 0.00040  | 0.00040  |
| H                                            | -2.97870 | -5.67497          | 0.14759  | 0.28048  | 0.00012  | 0.00012  |
| H                                            | -4.70334 | -3.88334          | 0.23566  | 0.26917  | 0.00065  | 0.00065  |
| H                                            | -6.15210 | -2.12598          | 0.33200  | 0.27638  | 0.00132  | 0.00132  |
| H                                            | -7.37891 | 0.02673           | 0.40943  | 0.28374  | 0.00022  | 0.00022  |
| H                                            | -6.16362 | 2.18658           | 0.27999  | 0.26862  | 0.00136  | 0.00136  |
| H                                            | -4.70568 | 3.96834           | 0.13419  | 0.27337  | 0.00059  | 0.00059  |
| H                                            | -2.96832 | 5.74154           | -0.03488 | 0.28576  | 0.00008  | 0.00008  |
| H                                            | -0.55809 | 5.06892           | -0.26595 | 0.28172  | 0.00036  | 0.00036  |
| H                                            | -0.00175 | 2.62035           | -0.29666 | 0.24924  | 0.00224  | 0.00224  |

53

|                                              |          |                   |          |          |         |         |
|----------------------------------------------|----------|-------------------|----------|----------|---------|---------|
| [Cu <sup>II</sup> (tpy)(Phe)] <sup>*2+</sup> | Cu-O=5.0 | E=-2937.244469090 |          |          |         |         |
| C                                            | 3.20663  | -0.42998          | 0.07525  | 0.80919  | 0.00022 | 0.00022 |
| C                                            | 4.74108  | -0.62586          | 0.19992  | -0.17169 | 0.01486 | 0.01486 |
| C                                            | 5.48209  | 0.47938           | -0.60065 | -0.48290 | 0.00213 | 0.00213 |
| C                                            | 6.94591  | 0.58288           | -0.27281 | 0.02898  | 0.13162 | 0.13162 |

|    |          |          |          |          |          |
|----|----------|----------|----------|----------|----------|
|    | 7.15514  | 1.12013  | 0.97529  | -0.20444 | 0.05078  |
| C  | 9.28150  | 0.26192  | -0.87123 | -0.19428 | 0.03164  |
| C  | 8.70458  | 1.22347  | 1.29503  | -0.22227 | -0.01527 |
| C  | 9.67496  | 0.79222  | 0.37460  | -0.13686 | 0.15310  |
| N  | 5.06867  | -2.01124 | -0.14710 | -0.92268 | 0.01304  |
| O  | 2.66320  | 0.65178  | 0.11288  | -0.59660 | 0.02033  |
| O  | 2.52853  | -1.58289 | -0.03751 | -0.73438 | 0.00422  |
| H  | 3.23575  | -2.28202 | -0.07101 | 0.53486  | -0.00035 |
| H  | 5.77167  | -2.41982 | 0.46005  | 0.42608  | -0.00020 |
| H  | 5.38566  | -2.11144 | -1.10837 | 0.41250  | 0.00006  |
| H  | 4.95037  | -0.49021 | 1.26821  | 0.27116  | -0.00046 |
| H  | 4.97556  | 1.42386  | -0.36821 | 0.28903  | 0.00739  |
| H  | 5.34140  | 0.29522  | -1.67210 | 0.25149  | -0.00007 |
| H  | 6.60855  | 1.47144  | 1.67949  | 0.24857  | -0.00159 |
| H  | 7.63360  | -0.23431 | -2.15497 | 0.24954  | -0.00029 |
| H  | 10.03522 | -0.06009 | -1.58250 | 0.26273  | -0.00099 |
| H  | 9.00993  | 1.64440  | 2.24735  | 0.26320  | 0.00025  |
| H  | 10.72949 | 0.87389  | 0.61834  | 0.26118  | -0.00422 |
| Cu | -2.31582 | 0.20428  | 0.01765  | 1.11871  | 0.36082  |
| N  | -2.89029 | 2.10923  | -0.02102 | -0.56923 | 0.04747  |
| N  | -4.23979 | -0.10143 | -0.00045 | -0.54306 | 0.13420  |
| N  | -2.26599 | -1.78398 | 0.05179  | -0.56954 | 0.04759  |
| C  | -2.11199 | 3.20433  | -0.03040 | 0.06301  | -0.00315 |
| C  | -2.64155 | 4.49459  | -0.06668 | -0.23190 | 0.00338  |
| C  | -4.02528 | 4.64818  | -0.09359 | -0.15066 | -0.00168 |
| C  | -4.83988 | 3.51152  | -0.08240 | -0.19119 | 0.00006  |
| C  | -4.25407 | 2.24996  | -0.04586 | 0.17545  | 0.00091  |
| C  | -5.02784 | 0.97563  | -0.03002 | 0.18969  | -0.00652 |
| C  | -6.41399 | 0.78812  | -0.04049 | -0.20737 | 0.00677  |
| C  | -6.89617 | -0.52697 | -0.01823 | -0.14590 | -0.00508 |
| C  | -6.02769 | -1.62552 | 0.01381  | -0.20617 | 0.00675  |
| C  | -4.65201 | -1.37066 | 0.02238  | 0.18983  | -0.00654 |
| C  | -3.51989 | -2.34052 | 0.05435  | 0.18601  | 0.00091  |
| C  | -3.68828 | -3.72108 | 0.08479  | -0.21697 | 0.00003  |
| C  | -2.56251 | -4.55004 | 0.11372  | -0.14005 | -0.00167 |
| C  | -1.29492 | -3.97480 | 0.10907  | -0.23402 | 0.00334  |
| C  | -1.18579 | -2.58363 | 0.07679  | 0.06126  | -0.00328 |
| H  | -1.03963 | 3.03887  | -0.00821 | 0.25921  | 0.00149  |
| H  | -1.97466 | 5.34927  | -0.07301 | 0.28150  | 0.00022  |
| H  | -4.47149 | 5.63693  | -0.12254 | 0.28289  | 0.00007  |
| H  | -5.91881 | 3.61397  | -0.10233 | 0.27087  | 0.00041  |
| H  | -7.10503 | 1.62262  | -0.06423 | 0.27471  | 0.00095  |
| H  | -7.96776 | -0.69857 | -0.02551 | 0.28148  | 0.00018  |
| H  | -6.42383 | -2.63405 | 0.03116  | 0.27271  | 0.00096  |
| H  | -4.68307 | -4.15140 | 0.08644  | 0.26908  | 0.00042  |
| H  | -2.68148 | -5.62838 | 0.13855  | 0.27844  | 0.00006  |
| H  | -0.39703 | -4.58169 | 0.12992  | 0.27783  | 0.00024  |
| H  | -0.21319 | -2.10005 | 0.06622  | 0.26948  | 0.00164  |

53

|                                             |          |                   |          |          |          |
|---------------------------------------------|----------|-------------------|----------|----------|----------|
| [Cu <sup>II</sup> (tpy)(Phe)] <sup>2+</sup> | Cu-O=6.0 | E=-2937.242487670 |          |          |          |
| C                                           | 3.98391  | -0.99859          | 0.09163  | 0.81192  | 0.00024  |
| C                                           | 5.53533  | -0.98705          | 0.23848  | -0.16912 | 0.02116  |
| C                                           | 6.12884  | 0.14179           | -0.65569 | -0.48423 | 0.00653  |
| C                                           | 7.54096  | 0.50463           | -0.30565 | 0.03770  | 0.14066  |
| C                                           | 7.81241  | 1.23484           | 0.88391  | -0.19892 | 0.06134  |
| C                                           | 8.62172  | 0.13624           | -1.13626 | -0.22610 | 0.00740  |
| C                                           | 9.92326  | 0.47834           | -0.79604 | -0.19345 | 0.03074  |
| C                                           | 9.11149  | 1.57875           | 1.22639  | -0.22442 | -0.02030 |
| C                                           | 10.17590 | 1.20014           | 0.39009  | -0.12983 | 0.16953  |
| N                                           | 6.04695  | -2.33317          | 0.01255  | -0.90988 | 0.03168  |
| O                                           | 3.31705  | 0.01113           | 0.02804  | -0.58646 | 0.04108  |
| O                                           | 3.45265  | -2.22286          | 0.08511  | -0.70837 | 0.00759  |
| H                                           | 4.22172  | -2.84502          | 0.12740  | 0.53451  | -0.00069 |
| H                                           | 6.79385  | -2.60186          | 0.64376  | 0.42591  | -0.00045 |
| H                                           | 6.35078  | -2.49637          | -0.94371 | 0.41252  | -0.00020 |
| H                                           | 5.70878  | -0.73501          | 1.29184  | 0.27091  | -0.00061 |
| H                                           | 5.46961  | 1.00883           | -0.52267 | 0.29092  | 0.00854  |
| H                                           | 6.05598  | -0.16391          | -1.70552 | 0.25317  | -0.00025 |
| H                                           | 6.98653  | 1.54088           | 1.52083  | 0.24997  | -0.00191 |
| H                                           | 8.42873  | -0.40715          | -2.05685 | 0.25129  | -0.00045 |
| H                                           | 10.74895 | 0.19725           | -1.44171 | 0.26366  | -0.00097 |
| H                                           | 9.30774  | 2.14485           | 2.13099  | 0.26383  | 0.00038  |
| H                                           | 11.19459 | 1.46796           | 0.65224  | 0.26150  | -0.00470 |

|   |          |     |          |          |          |          |
|---|----------|-----|----------|----------|----------|----------|
|   | 1.18205  | CCP | 0.10991  | -0.00502 | 1.07399  | 0.31019  |
| N | -4.64363 |     | 2.08948  | -0.04203 | -0.56649 | 0.04011  |
| N | -2.96871 |     | 0.11625  | -0.00032 | -0.54665 | 0.11273  |
| C | -2.02155 |     | -1.86785 | 0.03316  | -0.56611 | 0.04004  |
| C | -2.34478 |     | 3.05324  | -0.06349 | 0.06121  | -0.00278 |
| C | -3.68827 |     | 4.41003  | -0.08804 | -0.23416 | 0.00286  |
| C | -4.66704 |     | 4.77574  | -0.09027 | -0.14995 | -0.00149 |
| C | -4.28262 |     | 3.77796  | -0.06822 | -0.19309 | 0.00012  |
| C | -5.24930 |     | 2.44043  | -0.04443 | 0.17680  | 0.00070  |
| C | -6.64795 |     | 1.30437  | -0.02037 | 0.18870  | -0.00558 |
| C | -7.33591 |     | 1.34411  | -0.01681 | -0.20855 | 0.00573  |
| C | -6.65515 |     | 0.12435  | 0.00782  | -0.14881 | -0.00431 |
| C | -5.25624 |     | -1.09949 | 0.02841  | -0.20706 | 0.00572  |
| C | -4.29642 |     | -1.06818 | 0.02356  | 0.18875  | -0.00559 |
| C | -4.68981 |     | -2.21019 | 0.04219  | 0.18773  | 0.00069  |
| C | -3.71771 |     | -3.54503 | 0.06731  | -0.21818 | 0.00012  |
| C | -2.37202 |     | -4.54938 | 0.08371  | -0.14121 | -0.00149 |
| C | -2.03922 |     | -4.19244 | 0.07467  | -0.23468 | 0.00284  |
| H | -0.98714 |     | -2.83786 | 0.04923  | 0.06137  | -0.00280 |
| H | -1.55394 |     | 2.72560  | -0.06093 | 0.25542  | 0.00128  |
| H | -3.97738 |     | 5.15128  | -0.10487 | 0.27939  | 0.00017  |
| H | -5.71738 |     | 5.82149  | -0.10900 | 0.27811  | 0.00007  |
| H | -7.19609 |     | 4.04565  | -0.06982 | 0.26972  | 0.00036  |
| H | -8.42115 |     | -7.19609 | -0.03248 | 0.27288  | 0.00079  |
| H | -7.20883 |     | 0.12762  | 0.01110  | 0.27997  | 0.00015  |
| H | -5.74194 |     | -2.03089 | 0.04755  | 0.27111  | 0.00080  |
| H | -4.01378 |     | -3.80546 | 0.07414  | 0.26817  | 0.00036  |
| H | -1.58592 |     | -5.59318 | 0.10332  | 0.27786  | 0.00006  |
| H | -1.00177 |     | -4.93877 | 0.08690  | 0.27897  | 0.00017  |
| H |          |     | -2.51973 | 0.04135  | 0.25693  | 0.00131  |

53

[Cu<sup>II</sup>(tpy)(Phe)]<sup>2+</sup>

Cu-O=7.0

E=-2937.242351650

|    |          |  |          |          |          |          |
|----|----------|--|----------|----------|----------|----------|
| C  | 4.67448  |  | -0.87060 | -0.80144 | 0.81111  | -0.00004 |
| C  | 6.22956  |  | -0.89036 | -0.65857 | -0.16780 | 0.02478  |
| C  | 6.72675  |  | 0.55276  | -0.33572 | -0.48493 | 0.00993  |
| C  | 8.11014  |  | 0.59626  | 0.23449  | 0.04032  | 0.14318  |
| C  | 8.34249  |  | 0.15586  | 1.56728  | -0.19654 | 0.06613  |
| C  | 9.20447  |  | 1.06810  | -0.52438 | -0.22398 | 0.01119  |
| C  | 10.48059 |  | 1.09856  | 0.01951  | -0.19404 | 0.02870  |
| C  | 9.61648  |  | 0.18537  | 2.11342  | -0.22500 | -0.02268 |
| C  | 10.69437 |  | 0.65372  | 1.34209  | -0.12707 | 0.17647  |
| N  | 6.81212  |  | -1.53741 | -1.82193 | -0.90043 | 0.04588  |
| O  | 3.95779  |  | -0.19571 | -0.09587 | -0.57187 | 0.05631  |
| O  | 4.20636  |  | -1.69543 | -1.73715 | -0.69691 | 0.00973  |
| H  | 4.99843  |  | -2.09486 | -2.17140 | 0.53430  | -0.00093 |
| H  | 7.60086  |  | -2.14014 | -1.61564 | 0.42612  | -0.00062 |
| H  | 7.06648  |  | -0.89469 | -2.56700 | 0.41321  | -0.00047 |
| H  | 6.41509  |  | -1.53435 | 0.20977  | 0.27131  | -0.00071 |
| H  | 6.00374  |  | 0.95831  | 0.38412  | 0.29351  | 0.00932  |
| H  | 6.65947  |  | 1.16150  | -1.24415 | 0.25389  | -0.00041 |
| H  | 7.50457  |  | -0.18960 | 2.16710  | 0.25105  | -0.00205 |
| H  | 9.03948  |  | 1.42178  | -1.53805 | 0.25194  | -0.00056 |
| H  | 11.31632 |  | 1.46716  | -0.56641 | 0.26394  | -0.00092 |
| H  | 9.78269  |  | -0.14277 | 3.13416  | 0.26428  | 0.00044  |
| H  | 11.69376 |  | 0.67974  | 1.76492  | 0.26154  | -0.00490 |
| Cu | -3.03565 |  | 0.07501  | 0.04039  | 1.04794  | 0.28007  |
| N  | -3.32320 |  | 2.05564  | -0.06956 | -0.56180 | 0.03589  |
| N  | -5.00453 |  | 0.08102  | 0.09820  | -0.55116 | 0.10020  |
| N  | -3.32794 |  | -1.90382 | 0.16779  | -0.56394 | 0.03588  |
| C  | -2.39420 |  | 3.02215  | -0.15681 | 0.06044  | -0.00256 |
| C  | -2.72361 |  | 4.37570  | -0.22765 | -0.23573 | 0.00254  |
| C  | -4.06830 |  | 4.73632  | -0.20714 | -0.14256 | -0.00138 |
| C  | -5.04059 |  | 3.73647  | -0.11695 | -0.21370 | 0.00014  |
| C  | -4.64923 |  | 2.40210  | -0.04921 | 0.16915  | 0.00061  |
| C  | -5.61254 |  | 1.26630  | 0.04830  | 0.20826  | -0.00508 |
| C  | -7.01070 |  | 1.30701  | 0.09121  | -0.21274 | 0.00511  |
| C  | -7.69643 |  | 0.08947  | 0.18530  | -0.15012 | -0.00387 |
| C  | -7.01370 |  | -1.13232 | 0.23567  | -0.20775 | 0.00512  |
| C  | -5.61541 |  | -1.10034 | 0.18840  | 0.18819  | -0.00503 |
| C  | -4.65496 |  | -2.24209 | 0.22649  | 0.18847  | 0.00059  |
| C  | -5.05011 |  | -3.57408 | 0.31573  | -0.21919 | 0.00015  |
| C  | -4.08049 |  | -4.58012 | 0.34621  | -0.14253 | -0.00137 |
| C  | -2.73478 |  | -4.22776 | 0.28662  | -0.23580 | 0.00254  |
| C  | -2.40146 |  | -2.87621 | 0.19786  | 0.06041  | -0.00257 |



|                                         |          |          |          |          |         |         |
|-----------------------------------------|----------|----------|----------|----------|---------|---------|
| Electronic Supplementary Material       | 1565     | PCCP     | 2.69918  | -0.17018 | 0.25306 | 0.00116 |
| This journal is (c) The Owner Societies | 2008     |          | 5.11837  | -0.29684 | 0.27836 | 0.00015 |
| H                                       | -4.36300 | 5.77931  | -0.26052 | 0.27720  | 0.00006 |         |
| H                                       | -6.09189 | 3.99970  | -0.10017 | 0.26742  | 0.00032 |         |
| H                                       | -7.56034 | 2.24025  | 0.05403  | 0.27008  | 0.00070 |         |
| H                                       | -8.78110 | 0.09290  | 0.22029  | 0.27896  | 0.00014 |         |
| H                                       | -7.56552 | -2.06208 | 0.30943  | 0.27000  | 0.00070 |         |
| H                                       | -6.10221 | -3.83052 | 0.36137  | 0.26739  | 0.00033 |         |
| H                                       | -4.37798 | -5.62136 | 0.41567  | 0.27710  | 0.00006 |         |
| H                                       | -1.95002 | -4.97534 | 0.30756  | 0.27822  | 0.00015 |         |
| H                                       | -1.36465 | -2.56029 | 0.14902  | 0.25357  | 0.00116 |         |

53

|                                             |           |          |                   |          |          |  |
|---------------------------------------------|-----------|----------|-------------------|----------|----------|--|
| [Cu <sup>II</sup> (tpy)(Phe)] <sup>2+</sup> | 53        | Cu-O=8.0 | E=-2937.243018990 |          |          |  |
| C                                           | -5.34257  | -0.61767 | 1.13217           | 0.81097  | -0.00019 |  |
| C                                           | -6.89624  | -0.66129 | 0.95352           | -0.16684 | 0.02740  |  |
| C                                           | -7.35080  | 0.63585  | 0.21174           | -0.48477 | 0.01215  |  |
| C                                           | -8.70129  | 0.52030  | -0.42021          | 0.04104  | 0.14356  |  |
| C                                           | -8.87027  | -0.27447 | -1.58864          | -0.19463 | 0.06969  |  |
| C                                           | -9.82628  | 1.18662  | 0.11577           | -0.22290 | 0.01302  |  |
| C                                           | -11.07052 | 1.06653  | -0.48591          | -0.19407 | 0.02789  |  |
| C                                           | -10.11244 | -0.39553 | -2.19216          | -0.22568 | -0.02460 |  |
| C                                           | -11.22129 | 0.27115  | -1.64269          | -0.12608 | 0.17950  |  |
| N                                           | -7.52398  | -0.93617 | 2.23170           | -0.89407 | 0.05617  |  |
| O                                           | -4.59910  | -0.18349 | 0.28116           | -0.56050 | 0.06824  |  |
| O                                           | -4.91296  | -1.13935 | 2.27885           | -0.69083 | 0.01133  |  |
| H                                           | -5.71919  | -1.39053 | 2.78906           | 0.53387  | -0.00111 |  |
| H                                           | -8.31290  | -1.57130 | 2.18958           | 0.42673  | -0.00076 |  |
| H                                           | -7.78220  | -0.10552 | 2.75686           | 0.41407  | -0.00065 |  |
| H                                           | -7.06983  | -1.52611 | 0.30173           | 0.27201  | -0.00077 |  |
| H                                           | -6.58414  | 0.81566  | -0.55378          | 0.29496  | 0.00948  |  |
| H                                           | -7.31600  | 1.47572  | 0.91418           | 0.25466  | -0.00050 |  |
| H                                           | -8.00741  | -0.77493 | -2.02014          | 0.25164  | -0.00215 |  |
| H                                           | -9.70931  | 1.80846  | 0.99862           | 0.25233  | -0.00061 |  |
| H                                           | -11.92985 | 1.58543  | -0.07368          | 0.26401  | -0.00090 |  |
| H                                           | -10.22975 | -0.99467 | -3.08907          | 0.26437  | 0.00051  |  |
| H                                           | -12.19635 | 0.18020  | -2.11092          | 0.26149  | -0.00499 |  |
| Cu                                          | 3.38987   | 0.04607  | -0.07043          | 1.02131  | 0.26077  |  |
| N                                           | 3.68402   | 2.03070  | 0.00391           | -0.56065 | 0.03305  |  |
| N                                           | 5.36423   | 0.04906  | -0.11207          | -0.54993 | 0.09203  |  |
| N                                           | 3.68647   | -1.93761 | -0.15836          | -0.56064 | 0.03306  |  |
| C                                           | 2.75800   | 3.00205  | 0.06426           | 0.05977  | -0.00242 |  |
| C                                           | 3.09056   | 4.35581  | 0.11143           | -0.23646 | 0.00234  |  |
| C                                           | 4.43646   | 4.71207  | 0.09535           | -0.14348 | -0.00130 |  |
| C                                           | 5.40594   | 3.70762  | 0.03308           | -0.21978 | 0.00014  |  |
| C                                           | 5.01095   | 2.37315  | -0.01184          | 0.18894  | 0.00048  |  |
| C                                           | 5.97339   | 1.23384  | -0.07891          | 0.18934  | -0.00475 |  |
| C                                           | 7.37208   | 1.27290  | -0.10932          | -0.20838 | 0.00470  |  |
| C                                           | 8.05735   | 0.05323  | -0.17360          | -0.15161 | -0.00358 |  |
| C                                           | 7.37364   | -1.16854 | -0.20693          | -0.20840 | 0.00470  |  |
| C                                           | 5.97489   | -1.13379 | -0.17356          | 0.18934  | -0.00475 |  |
| C                                           | 5.01392   | -2.27603 | -0.19855          | 0.18895  | 0.00049  |  |
| C                                           | 5.41082   | -3.60933 | -0.25903          | -0.21980 | 0.00014  |  |
| C                                           | 4.44267   | -4.61679 | -0.27931          | -0.14354 | -0.00130 |  |
| C                                           | 3.09621   | -4.26458 | -0.23883          | -0.23649 | 0.00234  |  |
| C                                           | 2.76170   | -2.91181 | -0.17873          | 0.05982  | -0.00242 |  |
| H                                           | 1.72121   | 2.68273  | 0.07515           | 0.25200  | 0.00108  |  |
| H                                           | 2.30557   | 5.10192  | 0.15934           | 0.27768  | 0.00014  |  |
| H                                           | 4.73404   | 5.75500  | 0.13073           | 0.27651  | 0.00005  |  |
| H                                           | 6.45819   | 3.96718  | 0.02003           | 0.26686  | 0.00030  |  |
| H                                           | 7.92254   | 2.20606  | -0.08473          | 0.26924  | 0.00064  |  |
| H                                           | 9.14230   | 0.05493  | -0.19838          | 0.27816  | 0.00014  |  |
| H                                           | 7.92524   | -2.09998 | -0.25741          | 0.26922  | 0.00064  |  |
| H                                           | 6.46350   | -3.86555 | -0.29027          | 0.26684  | 0.00030  |  |
| H                                           | 4.74167   | -5.65885 | -0.32631          | 0.27646  | 0.00006  |  |
| H                                           | 2.31218   | -5.01308 | -0.25299          | 0.27762  | 0.00014  |  |
| H                                           | 1.72436   | -2.59578 | -0.14595          | 0.25216  | 0.00108  |  |

53

|                                             |           |          |                   |          |          |  |
|---------------------------------------------|-----------|----------|-------------------|----------|----------|--|
| [Cu <sup>II</sup> (tpy)(Phe)] <sup>2+</sup> | 53        | Cu-O=9.0 | E=-2937.243987900 |          |          |  |
| C                                           | -5.98626  | -0.62132 | 1.15463           | 0.81094  | -0.00037 |  |
| C                                           | -7.54072  | -0.65825 | 0.96497           | -0.16614 | 0.02928  |  |
| C                                           | -7.97973  | 0.64139  | 0.21594           | -0.48472 | 0.01370  |  |
| C                                           | -9.31959  | 0.52936  | -0.43655          | 0.04160  | 0.14394  |  |
| C                                           | -9.47279  | -0.26883 | -1.60523          | -0.19348 | 0.07182  |  |
| C                                           | -10.45068 | 1.20181  | 0.07933           | -0.22207 | 0.01450  |  |

|    |           |          |          |          |          |
|----|-----------|----------|----------|----------|----------|
|    |           | 1.08466  | -0.54199 | -0.19431 | 0.02709  |
| C  | -11.82034 | 0.28595  | -1.69856 | -0.12534 | 0.18167  |
| N  | -8.18041  | -0.92508 | 2.23679  | -0.88991 | 0.06310  |
| O  | -5.23772  | -0.19294 | 0.30591  | -0.55146 | 0.07717  |
| O  | -5.56606  | -1.13955 | 2.30548  | -0.68739 | 0.01247  |
| H  | -6.37392  | -1.38844 | 2.81284  | 0.53355  | -0.00123 |
| H  | -8.96901  | -1.56041 | 2.19461  | 0.42716  | -0.00086 |
| H  | -8.43494  | -0.09339 | 2.76189  | 0.41466  | -0.00076 |
| H  | -7.71299  | -1.52381 | 0.31398  | 0.27257  | -0.00079 |
| H  | -7.19956  | 0.81631  | -0.53747 | 0.29620  | 0.00970  |
| H  | -7.95235  | 1.48135  | 0.91846  | 0.25524  | -0.00058 |
| H  | -8.60492  | -0.77362 | -2.02135 | 0.25221  | -0.00221 |
| H  | -10.34536 | 1.82559  | 0.96225  | 0.25256  | -0.00066 |
| H  | -12.54917 | 1.60815  | -0.14545 | 0.26402  | -0.00088 |
| H  | -10.81079 | -0.98817 | -3.12510 | 0.26452  | 0.00054  |
| H  | -12.78813 | 0.19717  | -2.18204 | 0.26142  | -0.00506 |
| Cu | 3.75136   | 0.04456  | -0.06826 | 1.00918  | 0.24642  |
| N  | 4.05264   | 2.03031  | 0.00938  | -0.55975 | 0.03114  |
| N  | 5.72964   | 0.04396  | -0.10490 | -0.55066 | 0.08617  |
| N  | 4.04865   | -1.94123 | -0.15809 | -0.55973 | 0.03117  |
| C  | 3.13013   | 3.00498  | 0.06877  | 0.05940  | -0.00232 |
| C  | 3.46660   | 4.35768  | 0.11855  | -0.23702 | 0.00220  |
| C  | 4.81363   | 4.70964  | 0.10619  | -0.14434 | -0.00124 |
| C  | 5.77976   | 3.70202  | 0.04493  | -0.22041 | 0.00015  |
| C  | 5.38054   | 2.36877  | -0.00271 | 0.18914  | 0.00044  |
| C  | 6.34093   | 1.22719  | -0.06904 | 0.18917  | -0.00448 |
| C  | 7.73983   | 1.26426  | -0.09644 | -0.20893 | 0.00441  |
| C  | 8.42318   | 0.04356  | -0.16082 | -0.15263 | -0.00337 |
| C  | 7.73739   | -1.17694 | -0.19719 | -0.20893 | 0.00442  |
| C  | 6.33856   | -1.13941 | -0.16670 | 0.18914  | -0.00448 |
| C  | 5.37581   | -2.28055 | -0.19540 | 0.18918  | 0.00044  |
| C  | 5.77197   | -3.61418 | -0.25645 | -0.22043 | 0.00015  |
| C  | 4.80343   | -4.62110 | -0.28035 | -0.14439 | -0.00123 |
| C  | 3.45708   | -4.26817 | -0.24282 | -0.23707 | 0.00219  |
| C  | 3.12383   | -2.91517 | -0.18195 | 0.05945  | -0.00231 |
| H  | 2.09233   | 2.68904  | 0.07668  | 0.25137  | 0.00103  |
| H  | 2.68383   | 5.10618  | 0.16554  | 0.27722  | 0.00012  |
| H  | 5.11460   | 5.75153  | 0.14368  | 0.27598  | 0.00005  |
| H  | 6.83289   | 3.95805  | 0.03481  | 0.26635  | 0.00029  |
| H  | 8.29198   | 2.19637  | -0.06955 | 0.26864  | 0.00060  |
| H  | 9.50817   | 0.04340  | -0.18331 | 0.27755  | 0.00013  |
| H  | 8.28761   | -2.10919 | -0.24780 | 0.26863  | 0.00060  |
| H  | 6.82456   | -3.87101 | -0.28529 | 0.26636  | 0.00028  |
| H  | 5.10201   | -5.66326 | -0.32782 | 0.27594  | 0.00005  |
| H  | 2.67253   | -5.01608 | -0.25982 | 0.27719  | 0.00013  |
| H  | 2.08723   | -2.59696 | -0.15114 | 0.25140  | 0.00102  |

53

|                                             |           |                   |          |          |          |
|---------------------------------------------|-----------|-------------------|----------|----------|----------|
| [Cu <sup>II</sup> (tpy)(Phe)] <sup>2+</sup> | Cu-O=10.0 | E=-2937.245035230 |          |          |          |
| C                                           | -6.63406  | -0.63263          | 1.19888  | 0.81091  | -0.00055 |
| C                                           | -8.18639  | -0.67002          | 0.98337  | -0.16560 | 0.03080  |
| C                                           | -8.60970  | 0.63325           | 0.23022  | -0.48472 | 0.01504  |
| C                                           | -9.93415  | 0.52280           | -0.45177 | 0.04174  | 0.14382  |
| C                                           | -10.06015 | -0.26907          | -1.62813 | -0.19257 | 0.07351  |
| C                                           | -11.07773 | 1.19000           | 0.04331  | -0.22147 | 0.01565  |
| C                                           | -12.29814 | 1.07385           | -0.60534 | -0.19452 | 0.02643  |
| C                                           | -11.27882 | -0.38595          | -2.27834 | -0.22626 | -0.02668 |
| C                                           | -12.40624 | 0.28144           | -1.76913 | -0.12500 | 0.18304  |
| N                                           | -8.84747  | -0.93993          | 2.24184  | -0.88635 | 0.06869  |
| O                                           | -5.87455  | -0.19454          | 0.36552  | -0.54442 | 0.08438  |
| O                                           | -6.23076  | -1.16200          | 2.35012  | -0.68443 | 0.01340  |
| H                                           | -7.04455  | -1.41563          | 2.84454  | 0.53332  | -0.00133 |
| H                                           | -9.63461  | -1.57594          | 2.18694  | 0.42742  | -0.00092 |
| H                                           | -9.10615  | -0.11140          | 2.76971  | 0.41517  | -0.00087 |
| H                                           | -8.34691  | -1.53358          | 0.32676  | 0.27303  | -0.00083 |
| H                                           | -7.81228  | 0.80965           | -0.50474 | 0.29709  | 0.00979  |
| H                                           | -8.59696  | 1.47043           | 0.93635  | 0.25580  | -0.00064 |
| H                                           | -9.18231  | -0.76952          | -2.02825 | 0.25262  | -0.00226 |
| H                                           | -10.99283 | 1.80900           | 0.93178  | 0.25271  | -0.00069 |
| H                                           | -13.17161 | 1.59334           | -0.22480 | 0.26399  | -0.00086 |
| H                                           | -11.36328 | -0.98226          | -3.18081 | 0.26458  | 0.00056  |
| H                                           | -13.36313 | 0.19342           | -2.27401 | 0.26133  | -0.00510 |
| Cu                                          | 4.11329   | 0.01646           | -0.08024 | 1.00001  | 0.23535  |
| N                                           | 4.36380   | 2.01094           | 0.00514  | -0.55894 | 0.02970  |

|                                               |          |          |          |          |
|-----------------------------------------------|----------|----------|----------|----------|
| NElectronic Supplementary Material for PCCP   | 0.06876  | -0.09304 | -0.55124 | 0.08168  |
| NThis journal is (c) The Owner Societies 2008 | -1.96185 | -0.17114 | -0.55898 | 0.02970  |
| C                                             | 3.41619  | 2.96174  | 0.05428  | -0.00223 |
| C                                             | 3.71709  | 4.32261  | 0.10994  | 0.00209  |
| C                                             | 5.05468  | 4.70897  | 0.11469  | -0.00119 |
| C                                             | 6.04678  | 3.72643  | 0.06417  | 0.00016  |
| C                                             | 5.68247  | 2.38336  | 0.01004  | 0.00039  |
| C                                             | 6.67326  | 1.26727  | -0.04592 | -0.00427 |
| C                                             | 8.07098  | 1.34148  | -0.05394 | 0.00420  |
| C                                             | 8.78720  | 0.13946  | -0.11195 | -0.00321 |
| C                                             | 8.13439  | -1.09852 | -0.16071 | 0.00419  |
| C                                             | 6.73467  | -1.09762 | -0.14934 | -0.00427 |
| C                                             | 5.80334  | -2.26431 | -0.19387 | 0.00040  |
| C                                             | 6.23745  | -3.58618 | -0.25557 | 0.00015  |
| C                                             | 5.29801  | -4.61967 | -0.29506 | -0.00119 |
| C                                             | 3.94206  | -4.30429 | -0.27206 | 0.00209  |
| C                                             | 3.57047  | -2.96136 | -0.20978 | -0.00223 |
| H                                             | 2.38680  | 2.61935  | 0.04843  | 0.00099  |
| H                                             | 2.91482  | 5.05069  | 0.14810  | 0.00012  |
| H                                             | 5.32844  | 5.75814  | 0.15706  | 0.00005  |
| H                                             | 7.09303  | 4.00948  | 0.06711  | 0.00027  |
| H                                             | 8.59796  | 2.28768  | -0.01691 | 0.00057  |
| H                                             | 9.87203  | 0.16802  | -0.11945 | 0.00012  |
| H                                             | 8.70959  | -2.01586 | -0.20573 | 0.00057  |
| H                                             | 7.29713  | -3.81301 | -0.27312 | 0.00028  |
| H                                             | 5.62605  | -5.65290 | -0.34323 | 0.00004  |
| H                                             | 3.17886  | -5.07361 | -0.30134 | 0.00013  |
| H                                             | 2.52447  | -2.67425 | -0.19022 | 0.00099  |
